# Supplementary material for: A mechanochemical [2+2+2] cycloaddition facilitated by a cobalt(ii) catalyst and piezoelectric materials
Source: Royal Society of Chemistry journal article supplement (doi:10.1039/d5sc02074c), 2025-01-01
Supplement: d5sc02074c1.pdf [file d5sc02074c1.pdf]

## **A Mechanochemical [2+2+2] Cycloaddition Facilitated by a Cobalt(II) Catalyst and Piezoelectric Materials**

Kalipada Jana,<sup>a</sup> Koji Kubota,<sup>\*a,b</sup> Hajime Ito<sup>\*a,b</sup>

<sup>a</sup>*Institute for Chemical Reaction Design and Discovery (WPI-ICRD), Hokkaido University, Sapporo, Hokkaido 001-0021, Japan.*

<sup>b</sup>*Division of Applied Chemistry, Graduate School of Engineering, Hokkaido University, Sapporo, Hokkaido, 060-8628, Japan.*

*e-mail: hajito@eng.hokudai.ac.jp, kbt@eng.hokudai.ac.jp*

### **Table of Contents**

- 1. Instrumentation and Chemicals**
- 2. List of Substrates**
- 3. General Experimental Procedure for [2+2+2] Cycloaddition**
- 4. Scale-up Experiment Procedure of 3a**
- 5. Reaction in Test Tube**
- 6. [2+2+2] Cycloaddition of 3w Mediated by Photoredox Catalysis**
- 7. [2+2+2] Cycloaddition of 3w under Solution-based Conditions using Zinc**
- 8. Unsuccessful Examples**
- 9. Proposed Mechanism**
- 10. Characterization of Products**
- 11. References**
- 12. NMR Spectra**

## 1. Instrumentation and Chemicals

Materials were obtained from commercial suppliers and purified by standard procedures unless otherwise noted. BaTiO<sub>3</sub> (tetragonal powder, <3 μm particle size, 99%, product No. 208108) and BaTiO<sub>3</sub> (cubic powder, <75 μm particle size, 99%, product No. 467634) were purchased from Sigma-Aldrich Co. LLC. All reactions were performed using grinding vessels in a Retsch MM 400. Both jars (5 mL) and balls (10 mm) are made of stainless steel (SUS400B and SUS420J2, respectively). Solvents for reactions were purchased from commercial suppliers. NMR spectra were recorded on JNM-ECZ400S spectrometers (<sup>1</sup>H: 401 MHz, <sup>13</sup>C: 99 MHz, <sup>19</sup>F: 376 MHz). Tetramethylsilane (<sup>1</sup>H) and CDCl<sub>3</sub> (<sup>13</sup>C) were employed as external standards, respectively. Multiplicity was recorded as follows: s = singlet, brs = broad singlet, d = doublet, t = triplet, q = quartet, m = multiplet. Mesitylene was used as an internal standard to determine NMR yields. Medium-pressure column chromatography was carried out on a Biotage Flash Purification System Isolera, which is equipped with a UV detector. High-resolution mass spectra were recorded at the Global Facility Center, Hokkaido University.



## 2. List of Substrates

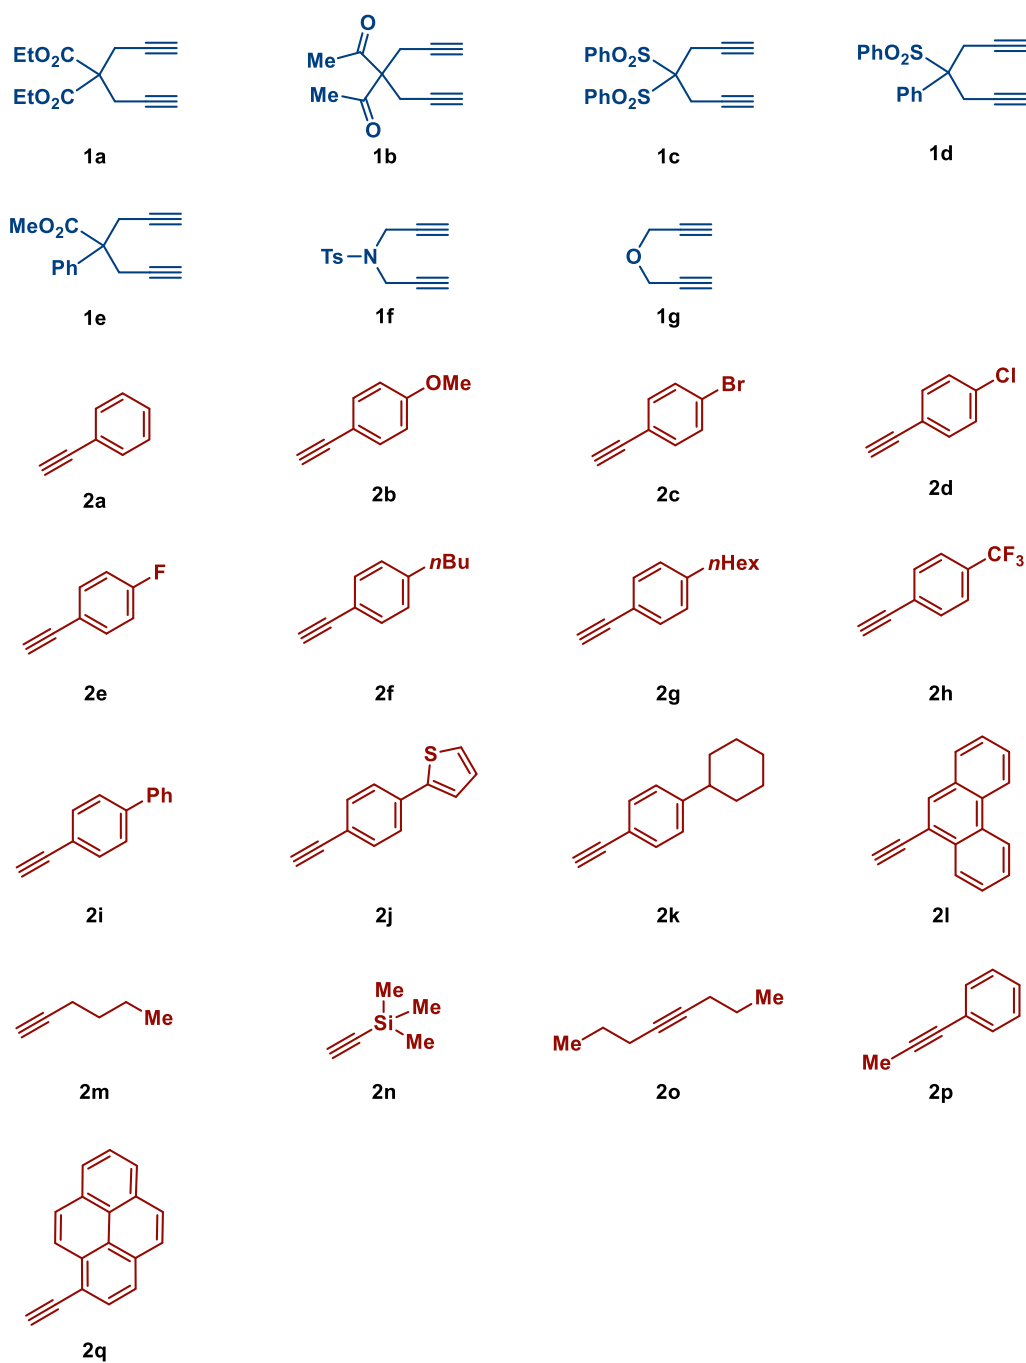

All substrates are commercially available except the diynes **1a-1f**. **1a-1f** were prepared according to the reported procedure.<sup>[1]</sup>

### 3. General Experimental Procedure for [2+2+2] Cycloaddition

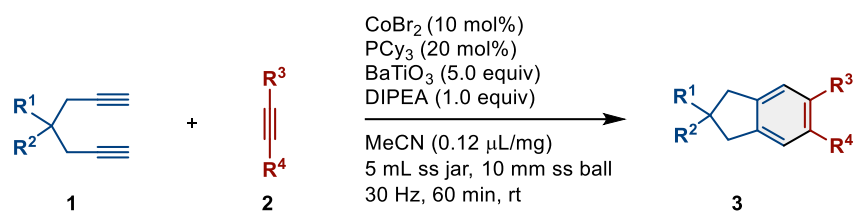

Diyne **1** (0.2 mmol) and BaTiO<sub>3</sub> (233.2 mg, 1.0 mmol, 5.0 equiv) were placed in a stainless-steel ball milling vessel (stainless steel, 5 mL) along with a single grinding ball (stainless steel, diameter: 10 mm). The vessel was then transferred to a glovebox, where CoBr<sub>2</sub> (4.3 mg, 0.02 mmol, 10 mol%), PCy<sub>3</sub> (11.3 mg, 0.04 mmol, 20 mol%), DIPEA (25.9 mg, 0.2 mmol, 1.0 equiv), alkyne **2** (0.6 mmol, 3.0 equiv), and MeCN (0.12 μL/mg) were added. After sealing the vessel inside the glovebox, the vessel was removed from the glovebox. Then, it was placed in a Retsch MM400 ball mill and subjected to milling at 30 Hz for 60 minutes. The jar was opened upon completion, and the reaction mixture was passed through a short silica gel column using EtOAc as the eluent. The crude product was then purified by flash column chromatography to afford the corresponding product **3**.

*\*Since CoBr<sub>2</sub> is highly moisture-sensitive, it should be stored and handled inside a glovebox.*

#### 4. Scale-up Experiment Procedure of 3a

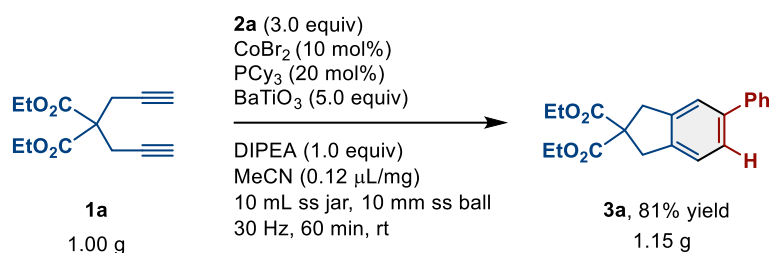

**1a** (1.00 g, 4.23 mmol) and  $\text{BaTiO}_3$  (4.94 g, 21.1 mmol, 5.0 equiv) were placed in a stainless-steel ball milling vessel (stainless steel, 10 mL) along with a single grinding ball (stainless steel, 10 mm). The vessel was then transferred to a glovebox, where  $\text{CoBr}_2$  (93.4 mg, 0.42 mmol, 10 mol%),  $\text{PCy}_3$  (238.3 mg, 0.04 mmol, 20 mol%),  $\text{DIPEA}$  (735  $\mu\text{L}$ , 4.23 mmol, 1.0 equiv), **2a** (1.4 mL, 12.6 mmol, 3.0 equiv), and  $\text{MeCN}$  (0.12  $\mu\text{L}/\text{mg}$ ) were added. After sealing the vessel inside the glovebox, the vessel was removed from the glovebox. Then, it was placed in a Retsch MM400 ball mill and subjected to milling at 30 Hz for 60 minutes. The jar was opened upon completion, and the reaction mixture was passed through a short silica gel column using  $\text{EtOAc}$  as the eluent. The crude product was then purified by flash column chromatography ( $\text{SiO}_2$ ,  $\text{Et}_2\text{O}/\text{hexane}$ , 0:100 to 10:90) to afford the corresponding product **3a** in 81% yield (1.16 g, 3.38 mmol) as a yellowish oil.

## 5. Reaction in Test Tube

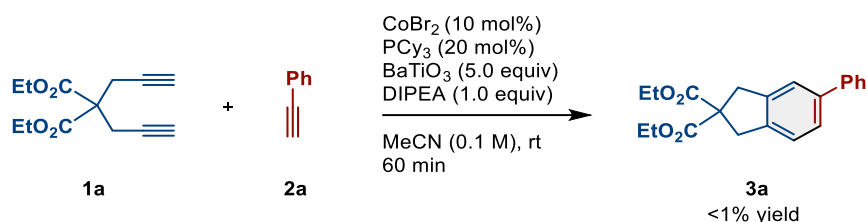

$\text{BaTiO}_3$  (233.4 mg, 1.0 mmol, 5.0 equiv) and **1a** (47.1 mg, 0.2 mmol) were placed in an oven-dried reaction test tube equipped with a magnetic stir bar. After the tube was sealed with a screw cap containing a Teflon-coated rubber septum, it was transferred to a glovebox. In a glovebox,  $\text{CoBr}_2$  (4.1 mg, 0.02 mmol, 0.1 equiv) and  $\text{PCy}_3$  (11.3 mg, 0.04 mmol, 0.2 equiv) were placed in the test tube. After sealing the test tube inside the glovebox, it was removed from the glovebox. Then, the test tube was connected to a vacuum/nitrogen manifold through a needle.  $\text{DIPEA}$  (35  $\mu\text{L}$ , 0.2 mmol, 1.0 equiv), **2a** (65  $\mu\text{L}$ , 0.6 mmol, 3.0 equiv), and  $\text{MeCN}$  (2.0 mL) were introduced to the mixture. The reaction mixture was stirred for 1 hour at room temperature before passing through a short silica gel column using  $\text{EtOAc}$  as the eluent. The crude mixture was analyzed by  $^1\text{H}$  NMR analysis using mesitylene as an internal standard. In this case, no product formation was observed.

## 6. [2+2+2] Cycloaddition of **3w** Mediated by Photoredox Catalysis

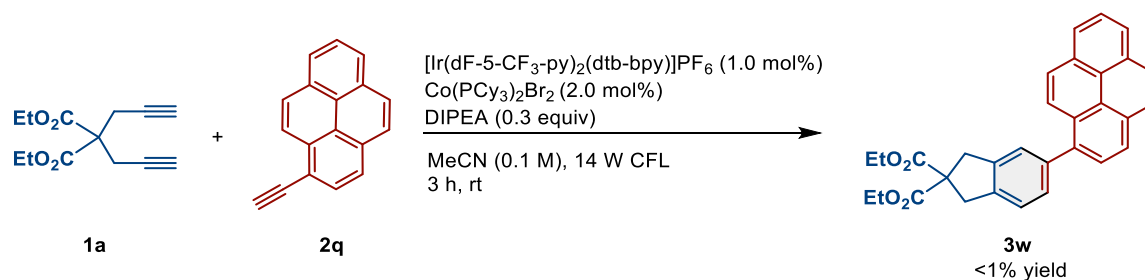

The reaction was performed according to the reported procedure.<sup>[2]</sup> **1a** (23.8 mg, 0.1 mmol), **2q** (45.2 mg, 0.3 mmol, 3.0 equiv) and  $[\text{Ir}(\text{dF-5-CF}_3\text{-py})_2(\text{dtbbpy})]\text{PF}_6$  (1.4 mg, 1.0  $\mu\text{mol}$ , 1 mol%) were placed in an oven-dried reaction test tube. After the vial was sealed with a screw cap containing a Teflon-coated rubber septum, the test tube was connected to a vacuum/nitrogen manifold through a needle. It was evacuated and then backfilled with nitrogen. This cycle was repeated three times. Then,  $\text{CoBr}_2(\text{PCy}_3)_2$  [0.1 mL, 0.1 M stock solution in MeCN (2  $\mu\text{mol}$  of the catalyst)], DIPEA (5  $\mu\text{L}$ , 30.0  $\mu\text{mol}$ , 0.3 equiv) and MeCN (1.0 mL) were introduced to the mixture. The reaction mixture was stirred for 3 hours under irradiation with a 14 W CFL bulb. Then, the solvent was removed under reduced pressure. The crude mixture was analyzed by  $^1\text{H}$  NMR analysis using mesitylene as an internal standard. In this case, no product formation was observed.

## 7. [2+2+2] Cycloaddition of **3w** under Solution-based Conditions using Zinc

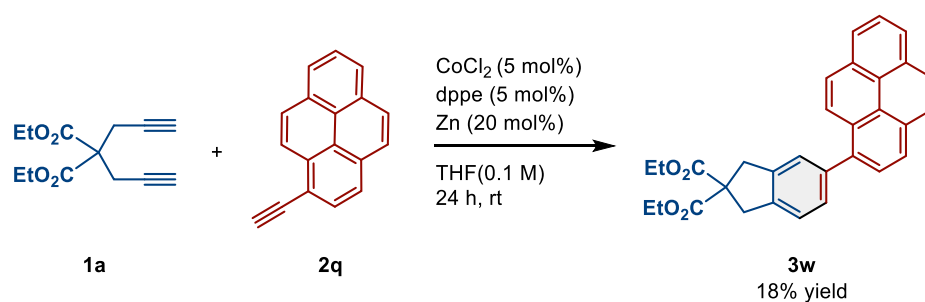

**1a** (23.5 mg, 0.1 mmol), zinc (1.3 mg, 0.01 mmol, 20 mol%), **2q** (29.4 mg, 0.13 mmol, 1.3 equiv),  $\text{CoCl}_2$  (1.2 mg, 5.0 mmol, 5 mol%) and dppe (2.1 mg, 5.0 mmol, 5 mol%) were placed in an oven-dried reaction test tube. After the vial was sealed with a screw cap containing a Teflon-coated rubber septum, the test tube was connected to a vacuum/nitrogen manifold through a needle. It was evacuated and then backfilled with nitrogen. THF (0.4 mL) was then introduced to the mixture. The reaction mixture was stirred for 24 hours before passing through a short silica gel column using EtOAc as the eluent. The crude yield of **3w** was determined by  $^1\text{H}$  NMR analysis using mesitylene as an internal standard. In this case, 18% yield of **3w** was obtained.

## 8. Unsuccessful Examples

### Reactions with nitriles

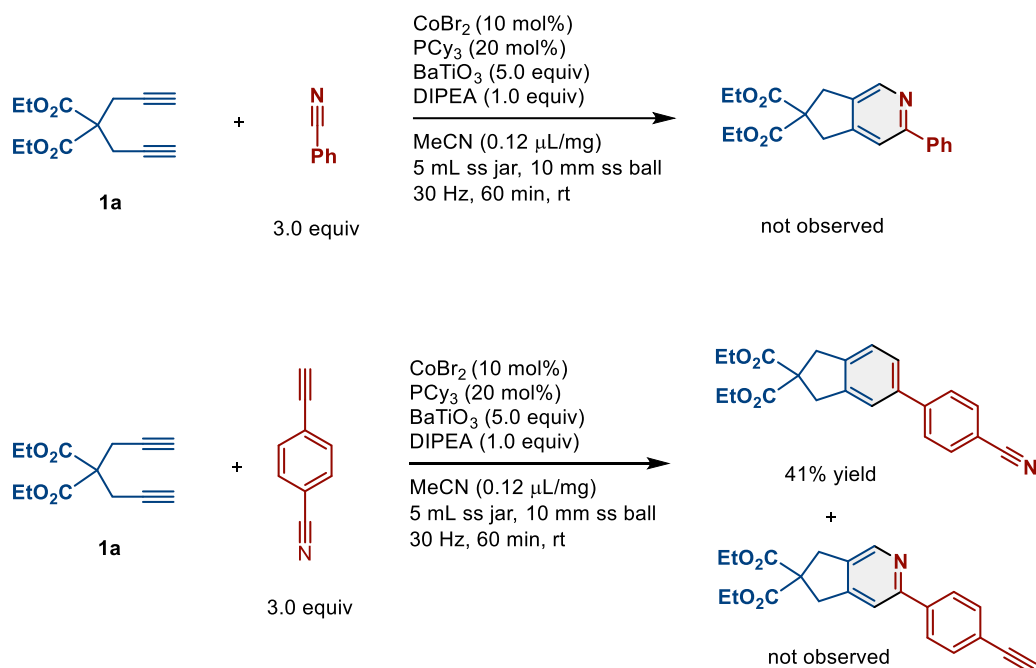

We examined benzonitrile as a coupling partner with **1a**. However, no desired product was formed. Instead, we obtained a homocoupled product of **1a**. To explore the chemoselectivity, we then tested 4-ethynylbenzonitrile as the coupling partner. In this case, the alkyne selectively underwent the cycloaddition reaction, affording the corresponding product in moderate yield. Generally, alkynes are more reactive than cyano groups in [2+2+2] cycloadditions. Therefore, the observed chemoselectivity aligns with established reactivity trends, and no unusual selectivity specific to mechanochemical conditions was observed.

### Reactions with an allene

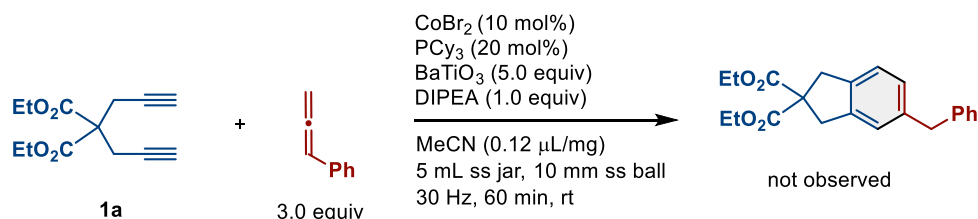

To assess the reactivity of allenes, we tested propa-1,2-dien-1-ylbenzene with **1a**. However, no coupling product was observed in this case. Instead, we obtained a homocoupled product of **1a**.

## Reactions with alkenes

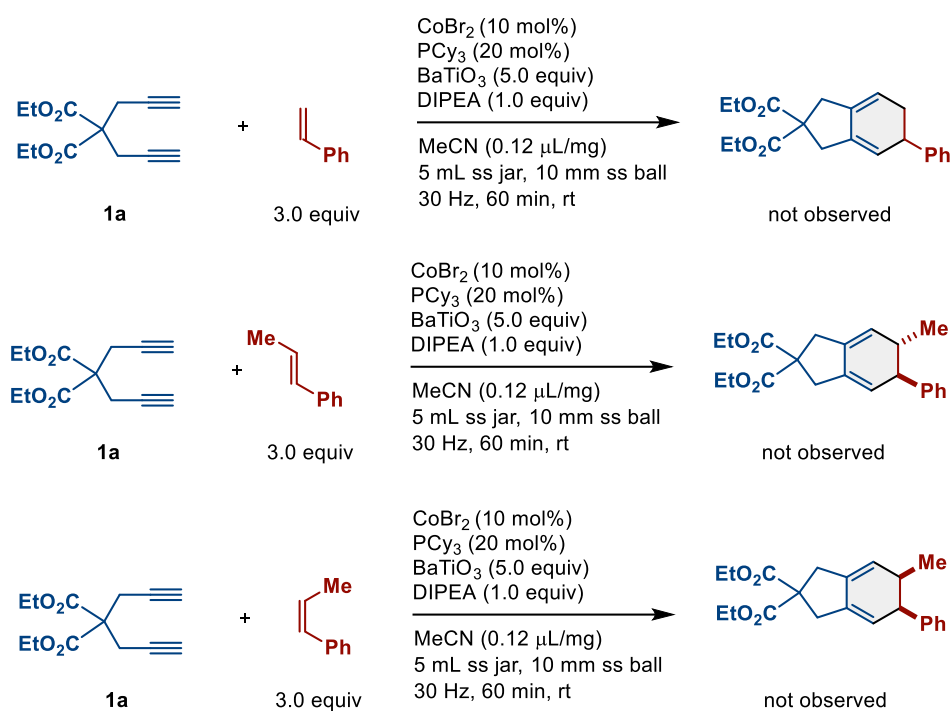

To evaluate the reactivity of alkenes, we conducted the reaction between styrene and **1a**. However, no coupling product was observed. Instead, we obtained a homocoupled product of **1a**. We further tested both (*E*)-prop-1-en-1-ylbenzene and (*Z*)-prop-1-en-1-ylbenzene under the optimized conditions, but neither yielded the desired product.



## Reactions with various alkynes

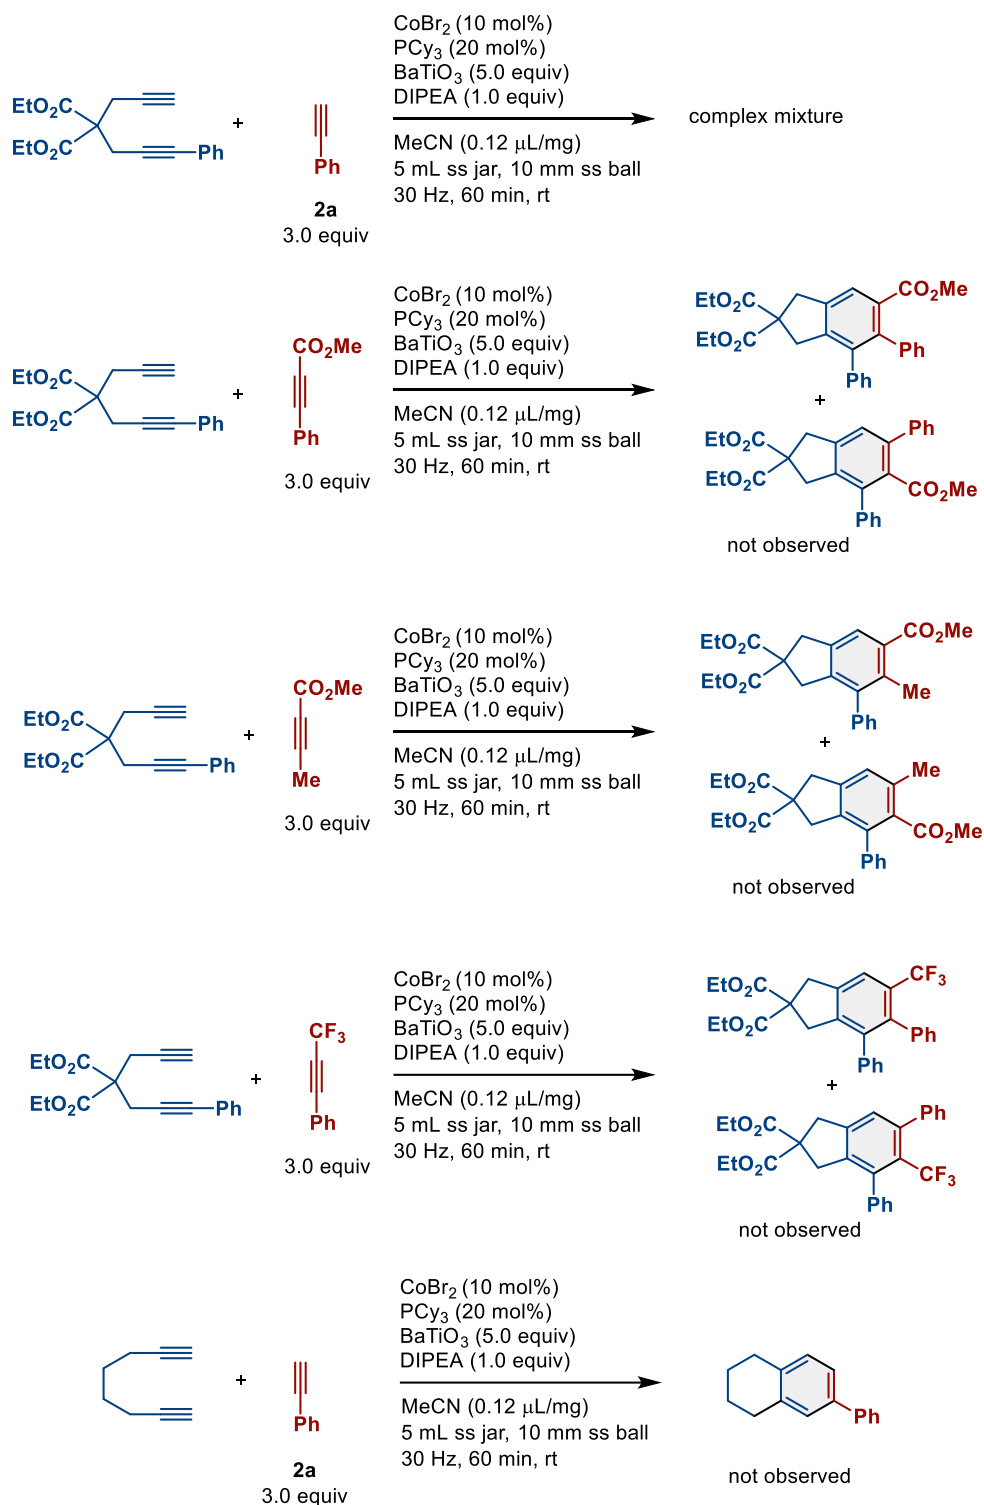

We investigated the reaction using diethyl 2-(3-phenylprop-2-yn-1-yl)-2-(prop-2-yn-1-yl)malonate as a representative monoaryl-substituted diyne and ethynylbenzene (**2a**) as the alkyne partner. However, the reaction yielded a complex mixture that was difficult to purify by column chromatography. Furthermore, the NMR spectra displayed overlapping signals, making it challenging to identify or confirm the formation of any specific product. We also tested other alkynes, including (3,3,3-trifluoroprop-1-yn-1-yl)benzene, methyl

3-phenylpropiolate, and methyl but-2-ynoate, but in all cases, the desired product was not observed. Instead, we mainly obtained homocoupled products with low conversion. We also tested octa-1,7-diyne under the optimized conditions. However, no desired product was obtained, and the starting material was consumed.

## 9. Proposed Mechanism

Based on prior literature, we propose that this low-valent cobalt species undergoes oxidative cyclization, followed by alkyne insertion and reductive elimination to afford the desired product (Mechanism A). Thus, we believe that BaTiO<sub>3</sub> is not involved in the cyclization step. However, it is also possible that the organocobalt intermediate undergoes single-electron oxidation by either a tertiary amine radical cation or piezoelectric BaTiO<sub>3</sub> to form a high-valent cobalt species, which may facilitate the reductive elimination step (Mechanism B). Further mechanistic studies are needed to evaluate these possibilities and will be pursued in future work.

### Mechanism A

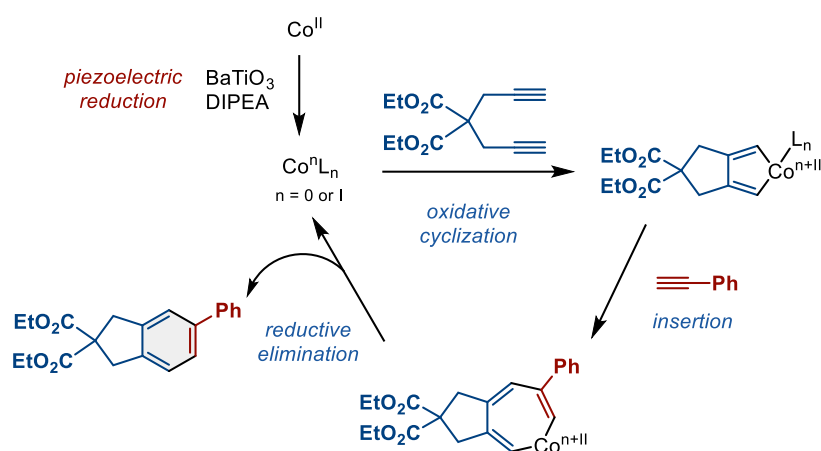

### Mechanism B

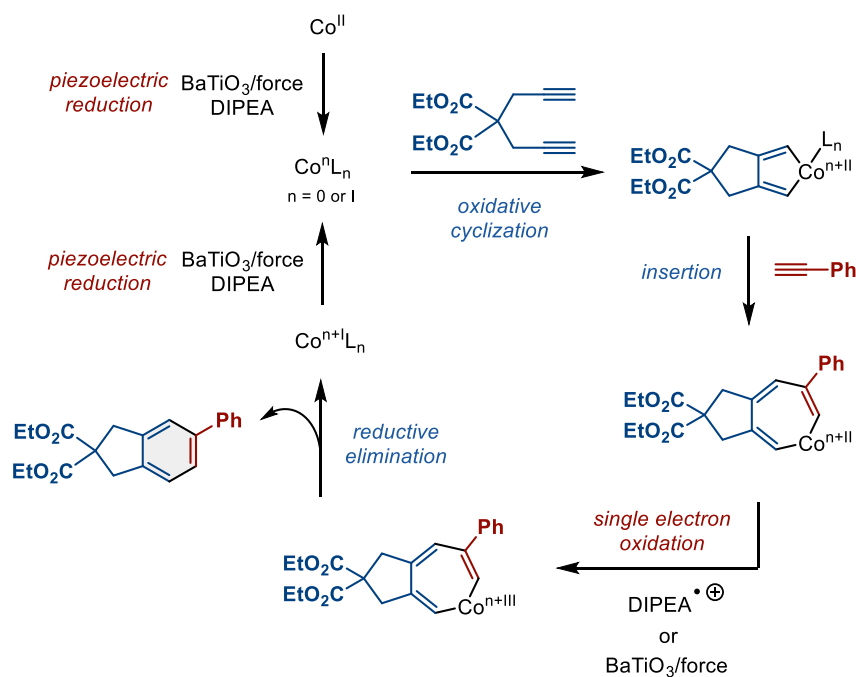

## 10. Characterization of Products

### Diethyl 5-phenyl-1,3-dihydro-2H-indene-2,2-dicarboxylate (**3a**)

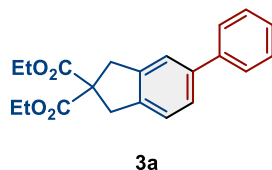

The reaction was conducted with **1a** (47.3 mg, 0.2 mmol) and **2a** (65  $\mu$ L, 0.6 mmol). The resulting crude mixture was purified by silica-gel column chromatography ( $\text{SiO}_2$ ,  $\text{Et}_2\text{O}$ /hexane, 0:100–10:90) to obtain **3a** in 86% yield (58.4 mg, 0.17 mmol) as a yellowish oil.  $^1\text{H}$  and  $^{13}\text{C}$  NMR of **3a** were in agreement with the literature.<sup>[3]</sup>

$^1\text{H}$  NMR (401 MHz,  $\text{CDCl}_3$ ,  $\delta$ ) 1.26 (t,  $J = 7.1$  Hz, 6H), 3.63 (d,  $J = 8.2$  Hz, 4H), 4.22 (q,  $J = 7.1$  Hz, 4H), 7.25 (d,  $J = 7.6$  Hz, 1H), 7.32 (t,  $J = 7.2$  Hz, 1H), 7.37–7.44 (m, 4H), 7.52–7.58 (m, 2H).  $^{13}\text{C}$  NMR (101 MHz,  $\text{CDCl}_3$ ,  $\delta$ ) 14.2 ( $\text{CH}_3$ ), 40.3 ( $\text{CH}_2$ ), 40.6 ( $\text{CH}_2$ ), 60.6 (C), 61.9 ( $\text{CH}_2$ ), 123.1 (CH), 124.6 (CH), 126.2 (CH), 127.16 (CH), 127.23 (CH), 128.8 (C), 139.3 (C), 140.4 (C), 140.8 (C), 141.4 (C), 171.8 (C). ESI ( $m/z$ ):  $[\text{M}+\text{Na}]^+$  calcd for  $\text{C}_{21}\text{H}_{22}\text{O}_4\text{Na}$ : 361.1410, found: 361.1401.

### Diethyl 5-(4-methoxyphenyl)-1,3-dihydro-2H-indene-2,2-dicarboxylate (**3b**)

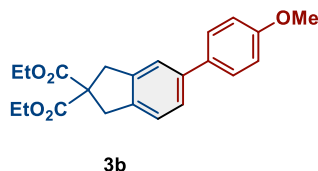

The reaction was conducted with **1a** (47.4 mg, 0.2 mmol) and **2b** (80  $\mu$ L, 0.6 mmol). The resulting crude mixture was purified by silica-gel column chromatography ( $\text{SiO}_2$ ,  $\text{EtOAc}$ /hexane, 0:100–5:95) to obtain **3b** in 81% yield (60.2 mg, 0.16 mmol) as a colorless gum.  $^1\text{H}$  and  $^{13}\text{C}$  NMR of **3b** were in agreement with the literature.<sup>[3]</sup>

$^1\text{H}$  NMR (401 MHz,  $\text{CDCl}_3$ ,  $\delta$ ) 1.26 (t,  $J = 7.1$  Hz, 6H), 3.62 (d,  $J = 8.2$  Hz, 4H), 3.84 (s, 3H), 4.22 (q,  $J = 7.1$  Hz, 4H), 6.93–6.98 (m, 2H), 7.24 (t,  $J = 7.6$  Hz, 1H), 7.35 (d,  $J = 10.0$  Hz, 2H), 7.46–7.52 (m, 2H).  $^{13}\text{C}$  NMR (101 MHz,  $\text{CDCl}_3$ ,  $\delta$ ) 14.1 ( $\text{CH}_3$ ), 40.3 ( $\text{CH}_2$ ), 40.6 ( $\text{CH}_2$ ), 55.4 ( $\text{CH}_3$ ), 60.6 (C), 61.8 ( $\text{CH}_2$ ), 114.2 (CH), 122.7 (CH), 124.5 (CH), 125.8 (CH), 128.2 (CH), 134.0 (C), 138.6 (C), 140.0 (C), 140.8 (C), 159.1 (C), 171.8 (C). ESI ( $m/z$ ):  $[\text{M}+\text{Na}]^+$  calcd for  $\text{C}_{22}\text{H}_{24}\text{O}_5\text{Na}$ : 391.1516, found: 391.1504.

### Diethyl 5-(4-bromophenyl)-1,3-dihydro-2H-indene-2,2-dicarboxylate (**3c**)

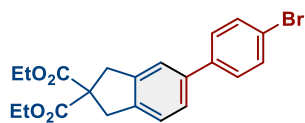

**3c**

The reaction was conducted with **1a** (47.1 mg, 0.2 mmol) and **2c** (108.2 mg, 0.6 mmol). The resulting crude mixture was purified by silica-gel column chromatography (SiO<sub>2</sub>, Et<sub>2</sub>O/hexane, 0:100–5:95) to obtain **3c** in 75% yield (62.4 mg, 0.15 mmol) as a yellowish oil.

<sup>1</sup>H NMR (401 MHz, CDCl<sub>3</sub>, δ) 1.27 (t, *J* = 7.2 Hz, 6H), 3.63 (d, *J* = 8.0 Hz, 4H), 4.22 (q, *J* = 7.1 Hz, 4H), 7.25–7.28 (m, 1H), 7.33–7.38 (m, 2H), 7.39–7.45 (m, 2H), 7.51–7.56 (m, 2H). <sup>13</sup>C NMR (101 MHz, CDCl<sub>3</sub>, δ) 14.2 (CH<sub>3</sub>), 40.3 (CH<sub>2</sub>), 40.5 (CH<sub>2</sub>), 60.6 (C), 61.9 (CH<sub>2</sub>), 121.4 (C), 122.9 (CH), 124.7 (CH), 126.0 (CH), 128.8 (CH), 131.9 (CH), 139.1 (C), 139.8 (C), 140.3 (C), 141.0 (C), 171.7 (C). ESI (m/z): [M+Na]<sup>+</sup> calcd for C<sub>21</sub>H<sub>21</sub>BrO<sub>4</sub>Na: 439.0515, found: 439.0510.

### Diethyl 5-(4-chlorophenyl)-1,3-dihydro-2H-indene-2,2-dicarboxylate (**3d**)

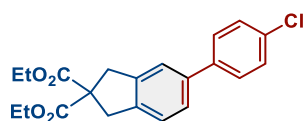

**3d**

The reaction was conducted with **1a** (47.4 mg, 0.2 mmol) and **2d** (82.2 mg, 0.6 mmol). The resulting crude mixture was purified by silica-gel column chromatography (SiO<sub>2</sub>, Et<sub>2</sub>O/hexane, 0:100–10:90) to obtain **3d** in 75% yield (56.5 mg, 0.15 mmol) as a yellowish oil.

<sup>1</sup>H NMR (401 MHz, CDCl<sub>3</sub>, δ) δ 1.26 (t, *J* = 7.1 Hz, 6H), 3.63 (d, *J* = 8.0 Hz, 4H), 4.22 (q, *J* = 7.1 Hz, 4H), 7.23–7.27 (m, 1H), 7.32–7.39 (m, 4H), 7.44–7.49 (m, 2H). <sup>13</sup>C NMR (101 MHz, CDCl<sub>3</sub>, δ) 14.1 (CH<sub>3</sub>), 40.3 (CH<sub>2</sub>), 40.5 (CH<sub>2</sub>), 60.6 (C), 61.9 (CH<sub>2</sub>), 122.9 (CH), 124.7 (CH), 126.1 (CH), 128.4 (CH), 128.9 (CH), 133.2 (C), 139.1 (C), 139.7 (C), 139.8 (C), 141.0 (C), 171.7 (C). ESI (m/z): [M+Na]<sup>+</sup> calcd for C<sub>21</sub>H<sub>21</sub>O<sub>4</sub>ClNa: 395.1021, found: 395.1013.

### Diethyl 5-(4-fluorophenyl)-1,3-dihydro-2H-indene-2,2-dicarboxylate (**3e**)

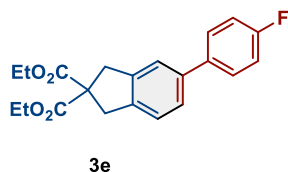

The reaction was conducted with **1a** (47.1 mg, 0.2 mmol) and **2e** (72.3 mg, 0.6 mmol). The resulting crude mixture was purified by silica-gel column chromatography (SiO<sub>2</sub>, Et<sub>2</sub>O/hexane, 0:100–10:90) to obtain **3e** in 86% yield (61.2 mg, 0.17 mmol) as a yellowish oil.

<sup>1</sup>H NMR (401 MHz, CDCl<sub>3</sub>, δ) 1.27 (t, *J* = 7.3 Hz, 6H), 3.63 (d, *J* = 6.6 Hz, 4H), 4.22 (q, *J* = 7.3 Hz, 4H), 7.09 (t, *J* = 8.0 Hz, 2H), 7.24 (d, *J* = 7.6 Hz, 1H), 7.30–7.38 (m, 2H), 7.45–7.54 (m, 2H). <sup>13</sup>C NMR (101 MHz, CDCl<sub>3</sub>, δ) 14.1 (CH<sub>3</sub>), 40.3 (CH<sub>2</sub>), 40.5 (CH<sub>2</sub>), 60.6 (C), 61.9 (CH<sub>2</sub>), 115.6 (d, *J* = 21.4 Hz, CH), 123.0 (CH), 124.6 (CH), 126.1 (CH), 128.7 (d, *J* = 7.9 Hz, CH), 137.5 (C), 139.3 (C), 139.4 (C), 140.9 (C), 162.4 (d, *J* = 246.0 Hz, C), 171.7 (C). <sup>19</sup>F NMR (377 MHz, CDCl<sub>3</sub>) δ –116.7. ESI (m/z): [M+Na]<sup>+</sup> calcd for C<sub>21</sub>H<sub>21</sub>FO<sub>4</sub>Na: 379.1316, found: 379.1304.

### Diethyl 5-(4-butylphenyl)-1,3-dihydro-2H-indene-2,2-dicarboxylate (**3f**)

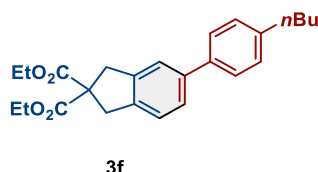

The reaction was conducted with **1a** (47.4 mg, 0.2 mmol) and **2f** (105 μL, 0.6 mmol). The resulting crude mixture was purified by silica-gel column chromatography (SiO<sub>2</sub>, Et<sub>2</sub>O/hexane, 0:100–10:90) to obtain **3f** in 72% yield (57.2 mg, 0.14 mmol) as a colorless oil.

<sup>1</sup>H NMR (401 MHz, CDCl<sub>3</sub>, δ) 0.94 (t, *J* = 7.2 Hz, 3H), 1.26 (t, *J* = 7.6 Hz, 6H), 1.38 (sext, *J* = 7.6 Hz, 2H), 1.58–1.67 (m, 2H), 2.63 (t, *J* = 7.2 Hz, 2H), 3.63 (d, *J* = 8.0 Hz, 4H), 4.21 (q, *J* = 7.2 Hz, 4H), 7.19–7.26 (m, 3H), 7.38 (d, *J* = 9.6 Hz, 2H), 7.46 (d, *J* = 8.0 Hz, 2H). <sup>13</sup>C NMR (101 MHz, CDCl<sub>3</sub>, δ) 14.09 (CH<sub>3</sub>), 14.15 (CH<sub>3</sub>), 22.5 (CH<sub>2</sub>), 33.8 (CH<sub>2</sub>), 35.4 (CH<sub>2</sub>), 40.3 (CH<sub>2</sub>), 40.6 (CH<sub>2</sub>), 60.6 (C), 61.8 (CH<sub>2</sub>), 122.9 (CH), 124.5 (CH), 126.1 (CH), 127.0 (CH), 128.9 (CH), 138.7 (C), 138.9 (C), 140.4 (C), 140.7 (C), 142.0 (C), 171.8 (C). ESI (m/z): [M+Na]<sup>+</sup> calcd for C<sub>25</sub>H<sub>30</sub>O<sub>4</sub>Na: 417.2036, found: 417.2026.

### Diethyl 5-(4-hexylphenyl)-1,3-dihydro-2H-indene-2,2-dicarboxylate (**3g**)

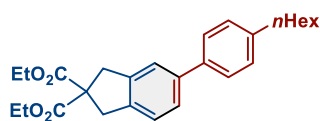

**3g**

The reaction was conducted with **1a** (47.3 mg, 0.2 mmol) and **2g** (125  $\mu$ L, 0.6 mmol). The resulting crude mixture was purified by silica-gel column chromatography ( $\text{SiO}_2$ ,  $\text{Et}_2\text{O}$ /hexane, 0:100–10:90) to obtain **3g** in 67% yield (58.2 mg, 0.13 mmol) as a yellowish oil.

$^1\text{H}$  NMR (401 MHz,  $\text{CDCl}_3$ ,  $\delta$ )  $\delta$  0.89 (t,  $J$  = 6.8 Hz, 3H), 1.26 (t,  $J$  = 7.1 Hz, 6H), 1.31–1.41 (m, 6H), 1.59–1.69 (m, 2H), 2.63 (t,  $J$  = 7.2 Hz, 2H), 3.63 (d,  $J$  = 7.8 Hz, 4H), 4.21 (q,  $J$  = 7.1 Hz, 4H), 7.20–7.26 (m, 3H), 7.38 (d,  $J$  = 8.1 Hz, 2H), 7.45 (d,  $J$  = 8.1 Hz, 2H).  $^{13}\text{C}$  NMR (101 MHz,  $\text{CDCl}_3$ ,  $\delta$ ) 14.1 ( $\text{CH}_3$ ), 14.2 ( $\text{CH}_3$ ), 22.7 ( $\text{CH}_2$ ), 29.2 ( $\text{CH}_2$ ), 31.6 ( $\text{CH}_2$ ), 31.9 ( $\text{CH}_2$ ), 35.7 ( $\text{CH}_2$ ), 40.3 ( $\text{CH}_2$ ), 40.6 ( $\text{CH}_2$ ), 60.6 (C), 61.8 ( $\text{CH}_2$ ), 123.0 (C), 124.5 (CH), 126.1 (CH), 127.0 (CH), 128.8 (CH), 138.7 (C), 138.9 (C), 140.4 (C), 140.7 (C), 142.0 (C), 171.8 (C). ESI ( $m/z$ ):  $[\text{M}+\text{Na}]^+$  calcd for  $\text{C}_{25}\text{H}_{30}\text{O}_4\text{Na}$ : 445.2350, found: 445.2339.

### Diethyl 5-[4-(trifluoromethyl)phenyl]-1,3-dihydro-2H-indene-2,2-dicarboxylate (**3h**)

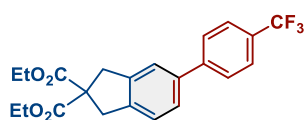

**3h**

The reaction was conducted with **1a** (47.3 mg, 0.2 mmol) and **2h** (86  $\mu$ L, 0.6 mmol). The resulting crude mixture was purified by silica-gel column chromatography ( $\text{SiO}_2$ ,  $\text{Et}_2\text{O}$ /hexane, 0:100–10:90) to obtain **3h** in 70% yield (57.2 mg, 0.14 mmol) as a yellowish oil.  $^1\text{H}$  and  $^{13}\text{C}$  NMR of **3h** were in agreement with the literature.<sup>[3]</sup>

$^1\text{H}$  NMR (401 MHz,  $\text{CDCl}_3$ ,  $\delta$ ) 1.27 (t,  $J$  = 7.1 Hz, 6H), 3.65 (d,  $J$  = 6.4 Hz, 4H), 4.23 (q,  $J$  = 7.1 Hz, 4H), 7.25–7.31 (m, 1H), 7.38–7.44 (m, 2H), 7.62–7.69 (m, 4H).  $^{13}\text{C}$  NMR (101 MHz,  $\text{CDCl}_3$ ,  $\delta$ ) 14.1 ( $\text{CH}_3$ ), 40.3 ( $\text{CH}_2$ ), 40.5 ( $\text{CH}_2$ ), 60.6 (C), 61.9 ( $\text{CH}_2$ ), 123.2 (CH), 124.8 (CH), 125.7 (d,  $J$  = 3.8 Hz, CH), 126.4 (CH), 127.4 (CH), 129.0 (d,  $J$  = 32.8 Hz, C), 138.9 (C), 140.4 (C), 141.1 (C), 144.9 (C), 171.6 (C). The  $\text{CF}_3$  carbon signal was not found due to splitting.  $^{19}\text{F}$  NMR (377 MHz,  $\text{CDCl}_3$ )  $\delta$  –62.87. ESI ( $m/z$ ):  $[\text{M}+\text{Na}]^+$  calcd for  $\text{C}_{22}\text{H}_{21}\text{F}_3\text{O}_4\text{Na}$ : 429.1284, found: 429.1272.

### Diethyl 5-[(1,1'-biphenyl)-4-yl]1,3-dihydro-2H-indene-2,2-dicarboxylate (**3i**)

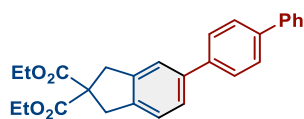

**3i**

The reaction was conducted with **1a** (47.3 mg, 0.2 mmol) and **2i** (106.8 mg, 0.6 mmol). The resulting crude mixture was purified by silica-gel column chromatography (SiO<sub>2</sub>, EtOAc/hexane, 0:100–5:95) to obtain **3i** in 66% yield (54.8 mg, 0.13 mmol) as a yellowish solid.

<sup>1</sup>H NMR (401 MHz, CDCl<sub>3</sub>, δ) 1.27 (t, *J* = 7.1, 6H), 3.65 (d, *J* = 9.3 Hz, 4H), 4.23 (q, *J* = 7.1, 4H), 7.28 (d, *J* = 7.8 Hz, 1H), 7.36 (t, *J* = 6.8 Hz, 1H), 7.42–7.50 (m, 4H), 7.60–7.70 (m, 6H). <sup>13</sup>C NMR (101 MHz, CDCl<sub>3</sub>, δ) 14.2 (CH<sub>3</sub>), 40.3 (CH<sub>2</sub>), 40.6 (CH<sub>2</sub>), 60.6 (C), 61.9 (CH<sub>2</sub>), 123.0 (CH), 124.6 (CH), 126.1 (CH), 127.1 (CH), 127.4 (CH), 127.5 (CH), 127.6 (CH), 128.9 (CH), 139.4 (C), 139.9 (C), 140.3 (C), 140.8 (C), 140.9 (C), 171.8 (C). ESI (m/z): [M+Na]<sup>+</sup> calcd for C<sub>27</sub>H<sub>26</sub>O<sub>4</sub>Na: 437.1723, found: 437.1716.

### Diethyl 5-(thiophen-2-yl)-1,3-dihydro-2H-indene-2,2-dicarboxylate (**3j**)

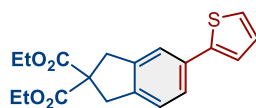

**3j**

The reaction was conducted with **1a** (47.2 mg, 0.2 mmol) and **2j** (60.1 mg, 0.57 mmol). The resulting crude mixture was purified by silica-gel column chromatography (SiO<sub>2</sub>, Et<sub>2</sub>O/hexane, 0:100–10:90) to obtain **3j** in 70% yield (48.6 mg, 0.14 mmol) as a colorless oil.

<sup>1</sup>H NMR (401 MHz, CDCl<sub>3</sub>, δ) 1.26 (t, *J* = 7.1 Hz, 6H), 3.61 (d, *J* = 8.9 Hz, 4H), 4.21 (q, *J* = 7.1 Hz, 4H), 7.21 (d, *J* = 7.7 Hz, 1H), 7.33–7.37 (m, 2H), 7.38–7.43 (m, 3H). <sup>13</sup>C NMR (101 MHz, CDCl<sub>3</sub>, δ) 14.1 (CH<sub>3</sub>), 40.3 (CH<sub>2</sub>), 40.5 (CH<sub>2</sub>), 60.6 (C), 61.9 (CH<sub>2</sub>), 120.0 (CH), 122.4 (CH), 124.6 (CH), 125.5 (CH), 126.2 (CH), 126.5 (CH), 135.0 (C), 139.1 (C), 140.8 (C), 142.5 (C), 171.7 (C). ESI (m/z): [M+Na]<sup>+</sup> calcd for C<sub>19</sub>H<sub>20</sub>O<sub>4</sub>SNa: 367.0975, found: 367.0988.



### Diethyl 5-(phenanthren-9-yl)-1,3-dihydro-2H-indene-2,2-dicarboxylate (**3k**)

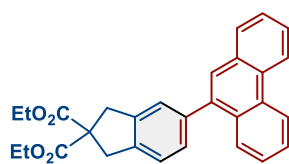

**3k**

The reaction was conducted with **1a** (47.3 mg, 0.2 mmol) and **2k** (121.2 mg, 0.6 mmol). The resulting crude mixture was purified by silica-gel column chromatography (SiO<sub>2</sub>, Et<sub>2</sub>O/hexane, 0:100–10:90) to obtain **3k** in 82% yield (72.4 mg, 0.16 mmol) as a yellowish oil.

<sup>1</sup>H NMR (401 MHz, CDCl<sub>3</sub>, δ) 1.29 (t, *J* = 7.1 Hz, 6H), 3.71 (d, *J* = 5.7 Hz, 4H), 4.25 (q, *J* = 7.1 Hz, 4H), 7.30–7.38 (m, 3H), 7.49–7.55 (m, 1H), 7.57–7.68 (m, 4H), 7.85–7.94 (m, 2H), 8.70 (d, *J* = 8.1 Hz, 1H), 8.75 (d, *J* = 7.2 Hz, 1H). <sup>13</sup>C NMR (101 MHz, CDCl<sub>3</sub>, δ) 14.2 (CH<sub>3</sub>), 40.5 (CH<sub>2</sub>), 40.6 (CH<sub>2</sub>), 60.6 (C), 61.9 (CH<sub>2</sub>), 122.6 (CH), 123.0 (CH), 124.1 (CH), 125.9 (CH), 126.5 (CH), 126.57 (CH), 126.61 (CH), 126.9 (CH), 127.1 (CH), 127.6 (CH), 128.7 (CH), 129.0 (CH), 130.0 (C), 130.7 (C), 131.3 (C), 131.7 (C), 138.9 (C), 139.3 (C), 139.7 (C), 140.3 (C), 171.9 (C). ESI (m/z): [M+Na]<sup>+</sup> calcd for C<sub>29</sub>H<sub>26</sub>O<sub>4</sub>Na: 461.1723, found: 461.1717.

### Diethyl 5-butyl-1,3-dihydro-2H-indene-2,2-dicarboxylate (**3l**)

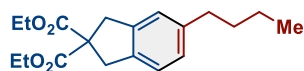

**3l**

The reaction was conducted with **1a** (47.1 mg, 0.2 mmol) and **2l** (68 μL, 0.6 mmol). The resulting crude mixture was purified by silica-gel column chromatography (SiO<sub>2</sub>, Et<sub>2</sub>O/hexane, 0:100–10:90) to obtain **3l** in 81% yield (51.4 mg, 0.16 mmol) as a yellowish oil. <sup>1</sup>H and <sup>13</sup>C NMR of the product **3l** were in agreement with the literature.<sup>[4]</sup>

<sup>1</sup>H NMR (401 MHz, CDCl<sub>3</sub>, δ) 0.92 (t, *J* = 7.3 Hz, 3H), 1.25 (t, *J* = 7.1 Hz, 6H), 1.30–1.39 (m, 2H), 1.52–1.61 (m, 2H), 2.56 (t, *J* = 7.6 Hz, 2H), 3.55 (d, *J* = 3.0 Hz, 4H), 4.19 (q, *J* = 7.1 Hz, 4H), 6.97 (d, *J* = 7.2 Hz, 1H), 7.00 (s, 1H), 7.08 (d, *J* = 7.6 Hz, 1H). <sup>13</sup>C NMR (101 MHz, CDCl<sub>3</sub>, δ) 14.06 (CH<sub>3</sub>), 14.11 (CH<sub>3</sub>), 22.5 (CH<sub>2</sub>), 34.0 (CH<sub>2</sub>), 35.6 (CH<sub>2</sub>), 40.3 (CH<sub>2</sub>), 40.5 (CH<sub>2</sub>), 60.6 (C), 61.7 (CH<sub>2</sub>), 124.0 (CH), 124.3 (CH), 127.2 (CH), 137.2 (C), 140.1 (C), 141.8 (C), 171.9 (C). ESI (m/z): [M+Na]<sup>+</sup> calcd for C<sub>19</sub>H<sub>26</sub>O<sub>4</sub>Na: 341.1723, found: 341.1713.

### Diethyl 5-cyclohexyl-1,3-dihydro-2H-indene-2,2-dicarboxylate (**3m**)

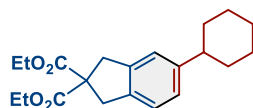

**3m**

The reaction was conducted with **1a** (47.4 mg, 0.2 mmol) and **2m** (65.2 mg, 0.6 mmol). The resulting crude mixture was purified by silica-gel column chromatography (SiO<sub>2</sub>, Et<sub>2</sub>O/hexane, 0:100–10:90) to obtain **3m** in 80% yield (55.6 mg, 0.16 mmol) as a yellowish oil.

<sup>1</sup>H NMR (401 MHz, CDCl<sub>3</sub>, δ) 1.19–1.24 (m, 1H), 1.25 (t, *J* = 7.2 Hz, 6H), 1.32–1.44 (m, 4H), 1.73 (d, *J* = 12.0 Hz, 1H), 1.78–1.89 (m, 4H), 2.40–2.49 (m, 1H), 3.55 (d, *J* = 8.02 Hz, 4H), 4.20 (q, *J* = 7.20 Hz, 4H), 7.00 (d, *J* = 8.0 Hz, 1H), 7.03 (s, 1H), 7.10 (d, *J* = 7.6 Hz, 1H). <sup>13</sup>C NMR (101 MHz, CDCl<sub>3</sub>, δ) 14.1 (CH<sub>3</sub>), 26.3 (CH<sub>2</sub>), 27.0 (CH<sub>2</sub>), 34.7 (CH<sub>2</sub>), 40.3 (CH<sub>2</sub>), 40.6 (CH<sub>2</sub>), 44.6 (CH), 60.5 (C), 61.7 (CH<sub>2</sub>), 122.6 (CH), 124.0 (CH), 125.7 (CH), 140.1 (C), 147.1 (C), 171.9 (C). ESI (m/z): [M+Na]<sup>+</sup> calcd for C<sub>21</sub>H<sub>28</sub>O<sub>4</sub>Na: 367.1880, found: 367.1869.

### Diethyl 5-(trimethylsilyl)-1,3-dihydro-2H-indene-2,2-dicarboxylate (**3n**)

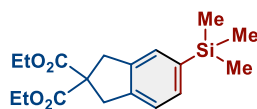

**3n**

The reaction was conducted with **1a** (47.1 mg, 0.2 mmol) and **2n** (58.2 mg, 0.6 mmol). The resulting crude mixture was purified by silica-gel column chromatography (SiO<sub>2</sub>, Et<sub>2</sub>O/hexane, 0:100–5:95) to obtain **3n** in 50% yield (33.4 mg, 0.10 mmol) as a yellowish oil. <sup>1</sup>H and <sup>13</sup>C NMR of **3n** were in agreement with the literature.<sup>[3]</sup>

<sup>1</sup>H NMR (401 MHz, CDCl<sub>3</sub>, δ) 0.24 (s, 9H), 1.26 (t, *J* = 7.6 Hz, 6H), 3.59 (d, *J* = 7.6 Hz, 4H), 4.20 (q, *J* = 6.8 Hz, 4H), 7.14–7.23 (d, *J* = 7.6 Hz, 1H), 7.30–7.40 (m, 2H). <sup>13</sup>C NMR (101 MHz, CDCl<sub>3</sub>, δ) –0.90 (CH<sub>3</sub>), 14.1 (CH<sub>3</sub>), 14.2 (CH<sub>3</sub>), 40.5 (CH<sub>2</sub>), 40.6 (CH<sub>2</sub>), 60.2 (C), 61.8 (CH<sub>2</sub>), 123.8 (CH), 129.2 (CH), 132.1 (CH), 138.9 (C), 139.5 (C), 140.9 (C), 171.8 (C). ESI (m/z): [M+Na]<sup>+</sup> calcd for C<sub>18</sub>H<sub>26</sub>O<sub>4</sub>SiNa: 357.1493, found: 357.1482.

### Diethyl 5,6-dipropyl-1,3-dihydro-2H-indene-2,2-dicarboxylate (**3o**)

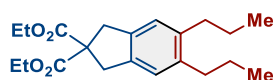

**3o**

The reaction was conducted with **1a** (47.3 mg, 0.2 mmol) and **2o** (66.3 mg, 0.6 mmol). The resulting crude mixture was purified by silica-gel column chromatography (SiO<sub>2</sub>, Et<sub>2</sub>O/hexane, 0:100–10:90) to obtain **3o** in 44% yield (30.8 mg, 0.09 mmol) as a colorless oil.

<sup>1</sup>H NMR (401 MHz, CDCl<sub>3</sub>, δ) 0.97 (t, *J* = 7.2 Hz, 6H), 1.25 (t, *J* = 7.6 Hz, 6H), 1.52–1.62 (m, 4H), 2.52 (t, *J* = 7.6 Hz, 4H), 3.53 (s, 4H), 4.18 (q, *J* = 7.2 Hz, 4H), 6.96 (s, 2H). <sup>13</sup>C NMR (101 MHz, CDCl<sub>3</sub>, δ) 14.1 (CH<sub>3</sub>), 14.4 (CH<sub>3</sub>), 24.6 (CH<sub>2</sub>), 34.9 (CH<sub>2</sub>), 40.4 (CH<sub>2</sub>), 60.5 (C), 61.7 (CH<sub>2</sub>), 124.8 (CH), 137.5 (C), 139.2 (C), 172.0 (C). ESI (m/z): [M+Na]<sup>+</sup> calcd for C<sub>21</sub>H<sub>30</sub>O<sub>4</sub>Na: 369.2036, found: 369.2027.

### Diethyl 5-methyl-6-phenyl-1,3-dihydro-2H-indene-2,2-dicarboxylate (**3p**)

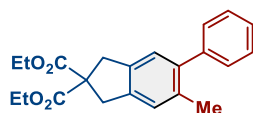

**3p**

The reaction was conducted with **1a** (47.2 mg, 0.2 mmol) and **2p** (70.2 mg, 0.6 mmol). The resulting crude mixture was purified by silica-gel column chromatography (SiO<sub>2</sub>, Et<sub>2</sub>O/hexane, 0:100–10:90) to obtain **3p** in 52% yield (36.5 mg, 0.10 mmol) as a colorless oil. <sup>1</sup>H and <sup>13</sup>C NMR of **3p** were in agreement with the literature.<sup>[5]</sup>

<sup>1</sup>H NMR (401 MHz, CDCl<sub>3</sub>, δ) 1.26 (t, *J* = 7.1 Hz, 6H), 2.21 (s, 3H), 3.59 (d, *J* = 5.8 Hz, 4H), 4.22 (q, *J* = 7.1 Hz, 4H), 7.05 (s, 1H), 7.10 (s, 1H), 7.25–7.33 (m, 3H), 7.37–7.42 (m, 2H). <sup>13</sup>C NMR (101 MHz, CDCl<sub>3</sub>, δ) 14.1 (CH<sub>3</sub>), 20.5 (CH<sub>3</sub>), 40.3 (CH<sub>2</sub>), 40.4 (CH<sub>2</sub>), 60.6 (C), 61.8 (CH<sub>2</sub>), 125.6 (CH), 126.0 (CH), 126.7 (CH), 128.1 (CH), 129.3 (CH), 134.2 (C), 137.6 (C), 139.2 (C), 140.9 (C), 142.2 (C), 171.9 (C). ESI (m/z): [M+Na]<sup>+</sup> calcd for C<sub>22</sub>H<sub>24</sub>O<sub>4</sub>Na: 375.1567, found: 375.1558.

### 1,1'-(5-Phenyl-2,3-dihydro-1H-indene-2,2-diyl)bis(ethan-1-one) (3q)

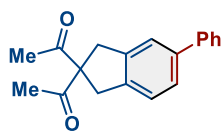

3q

The reaction was conducted with **1b** (35.4 mg, 0.2 mmol) and **2a** (65  $\mu$ L, 0.6 mmol). The resulting crude mixture was purified by silica-gel column chromatography ( $\text{SiO}_2$ , EtOAc/hexane, 0:100–10:90) to obtain **3q** in 64% yield (35.6 mg, 0.13 mmol) as a colorless oil.<sup>[6]</sup>

$^1\text{H}$  NMR (401 MHz,  $\text{CDCl}_3$ ,  $\delta$ ) 2.19 (s, 6H), 3.55 (d,  $J = 7.8$  Hz, 4H), 7.25 (d,  $J = 6.8$  Hz, 1H), 7.29–7.35 (m, 1H), 7.37–7.45 (m, 4H), 7.54 (d,  $J = 7.6$  Hz, 2H).  $^{13}\text{C}$  NMR (101 MHz,  $\text{CDCl}_3$ ,  $\delta$ ) 26.7 ( $\text{CH}_3$ ), 37.4 ( $\text{CH}_2$ ), 37.7 ( $\text{CH}_2$ ), 75.1 (C), 123.3 (CH), 124.8 (CH), 126.4 (CH), 127.2 (CH), 127.3 (CH), 128.8 (CH), 138.9 (C), 140.5 (C), 140.6 (C), 141.2 (C), 204.9 (C). ESI ( $m/z$ ):  $[\text{M}+\text{Na}]^+$  calcd for  $\text{C}_{19}\text{H}_{18}\text{O}_2\text{Na}$ : 301.1199, found: 301.1193.

### 5-Phenyl-2,2-bis(phenylsulfonyl)-2,3-dihydro-1H-indene (3r)

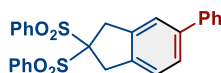

3r

The reaction was conducted with **1c** (74.3 mg, 0.2 mmol) and **2a** (65  $\mu$ L, 0.6 mmol). The resulting crude mixture was purified by silica-gel column chromatography ( $\text{SiO}_2$ , EtOAc/hexane, 0:100–40:60) to obtain **3r** in 89% yield (84.1 mg, 0.18 mmol) as a colorless oil.

$^1\text{H}$  NMR (400 MHz,  $\text{CDCl}_3$ ,  $\delta$ ) 3.97 (d,  $J = 4.0$  Hz, 4H), 6.97 (d,  $J = 7.6$  Hz, 1H), 7.07 (s, 1H), 7.20 (d,  $J = 7.6$  Hz, 1H), 7.30–7.50 (m, 9H), 7.54–7.62 (m, 2H), 7.96 (d,  $J = 8.4$  Hz, 4H).  $^{13}\text{C}$  NMR (101 MHz,  $\text{CDCl}_3$ ,  $\delta$ ) 38.5 ( $\text{CH}_2$ ), 38.7 ( $\text{CH}_2$ ), 92.7 (C), 122.6 (CH), 124.2 (CH), 126.7 (CH), 127.1 (CH), 127.5 (CH), 128.8 (CH), 128.9 (CH), 130.9 (CH), 134.7 (CH), 136.8 (C), 137.2 (C), 138.7 (C), 140.8 (C), 140.9 (C). ESI ( $m/z$ ):  $[\text{M} + \text{Na}]^+$  calcd for  $\text{C}_{27}\text{H}_{22}\text{O}_4\text{S}_2\text{Na}$ : 497.0852, found: 497.0838.

### 2-(Methylsulfonyl)-2,5-diphenyl-2,3-dihydro-1H-indene (3s)

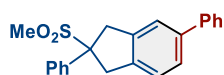

3s

The reaction was conducted with **1d** (49.1 mg, 0.2 mmol) and **2a** (65  $\mu$ L, 0.6 mmol). The resulting crude mixture was purified by silica-gel column chromatography ( $\text{SiO}_2$ , EtOAc/hexane, 0:100–30:70) to obtain **3s** in 92% yield (64.2 mg, 0.18 mmol) as a yellowish oil.

$^1\text{H}$  NMR (400 MHz,  $\text{CDCl}_3$ ,  $\delta$ ) 2.48 (s, 3H), 3.81 (dd,  $J = 7.6, 10.0$  Hz, 2H), 4.19 (dd,  $J = 7.6, 10.0$  Hz, 2H), 7.31–7.37 (m, 2H), 7.38–7.47 (m, 6H), 7.49 (s, 1H), 7.54–7.63 (m, 4H).  $^{13}\text{C}$  NMR (101 MHz,  $\text{CDCl}_3$ ,  $\delta$ ) 36.8 ( $\text{CH}_3$ ), 40.8 ( $\text{CH}_2$ ), 41.1 ( $\text{CH}_2$ ), 76.6 (C), 123.0 (CH), 124.6 (CH), 126.8 (CH), 127.2 (CH), 127.5 (CH), 128.6 (CH), 128.9 (CH), 129.0 (CH), 129.9 (CH), 136.1 (C), 138.9 (C), 140.5 (C), 140.9 (C), 141.0 (C). ESI ( $m/z$ ):  $[\text{M}+\text{Na}]^+$  calcd for  $\text{C}_{22}\text{H}_{20}\text{O}_2\text{SNa}$ : 371.1076, found: 371.1067.

### Methyl 2,5-diphenyl-2,3-dihydro-1H-indene-2-carboxylate (3t)

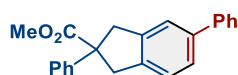

3t

The reaction was conducted with **1e** (45.4 mg, 0.2 mmol) and **2a** (65  $\mu$ L, 0.6 mmol). The resulting crude mixture was purified by silica-gel column chromatography ( $\text{SiO}_2$ , EtOAc/hexane, 0:100–10:90) to obtain **3t** in 91% yield (59.8 mg, 0.18 mmol) as a colorless oil.

$^1\text{H}$  NMR (401 MHz,  $\text{CDCl}_3$ ,  $\delta$ ) 3.38 (dd,  $J = 8.2, 15.6$  Hz, 2H), 3.62 (s, 3H), 4.03 (dd,  $J = 6.9, 15.6$  Hz, 2H), 7.24–7.28 (m, 1H), 7.29–7.38 (m, 4H), 7.39–7.45 (m, 5H), 7.47 (s, 1H), 7.56 (d,  $J = 8.0$  Hz, 2H).  $^{13}\text{C}$  NMR (101 MHz,  $\text{CDCl}_3$ ,  $\delta$ ) 42.6 ( $\text{CH}_2$ ), 42.9 ( $\text{CH}_2$ ), 52.8 ( $\text{CH}_3$ ), 59.9 (C), 123.2 (CH), 124.6 (CH), 126.0 (CH), 126.8 (CH), 127.1 (CH), 127.2 (CH), 128.7 (CH), 128.8 (CH), 129.2 (CH), 140.2 (C), 140.4 (C), 141.5 (C), 141.9 (C), 142.7 (C), 176.0 (C). ESI ( $m/z$ ):  $[\text{M}+\text{Na}]^+$  calcd for  $\text{C}_{23}\text{H}_{20}\text{O}_2\text{Na}$ : 351.1356, found: 351.1344.

### 5-Phenyl-2-tosylisoindoline (3u)

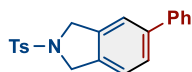

**3u**

The reaction was conducted with **1f** (49.3 mg, 0.2 mmol) and **2a** (65  $\mu$ L, 0.6 mmol). The resulting crude mixture was purified by silica-gel column chromatography (SiO<sub>2</sub>, EtOAc/hexane, 0:100–10:90) to obtain **3u** in 89% yield (62.1 mg, 0.18 mmol) as a yellowish solid. <sup>1</sup>H and <sup>13</sup>C NMR of **3u** were in agreement with the literature.<sup>[4]</sup>

<sup>1</sup>H NMR (401 MHz, CDCl<sub>3</sub>,  $\delta$ ) 2.40 (s, 3H), 4.67 (d,  $J$  = 4.2 Hz, 4H), 7.20–7.28 (m, 1H), 7.29–7.38 (m, 4H), 7.43 (q,  $J$  = 8.1 Hz, 3H), 7.51 (d,  $J$  = 8.0 Hz, 2H), 7.79 (d,  $J$  = 7.9 Hz, 2H). <sup>13</sup>C NMR (101 MHz, CDCl<sub>3</sub>,  $\delta$ ) 21.6 (CH<sub>3</sub>), 53.6 (CH<sub>2</sub>), 53.8 (CH<sub>2</sub>), 121.4 (CH), 123.0 (CH), 127.0 (CH), 127.2 (CH), 127.6 (CH), 127.7 (CH), 128.9 (CH), 129.9 (CH), 133.7 (C), 135.2 (C), 136.9 (C), 140.6 (C), 141.3 (C), 143.8 (C). ESI (m/z): [M + Na]<sup>+</sup> calcd for C<sub>21</sub>H<sub>19</sub>NO<sub>2</sub>SNa: 372.1029, found: 372.1022.

### 5-Phenyl-1,3-dihydroisobenzofuran (3v)

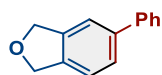

**3v**

The reaction was conducted with **1g** (18.4 mg, 0.2 mmol) and **2a** (65  $\mu$ L, 0.6 mmol). The resulting crude mixture was purified by silica-gel column chromatography (SiO<sub>2</sub>, Et<sub>2</sub>O/hexane, 0:100–10:90) to obtain **3v** in 79% yield (30.2 mg, 0.16 mmol) as a yellowish oil.

<sup>1</sup>H NMR (400 MHz, CDCl<sub>3</sub>,  $\delta$ ) 5.16 (s, 4H), 7.30 (d,  $J$  = 8.0 Hz, 1H), 7.33–7.39 (m, 1H), 7.40–7.53 (m, 4H), 7.58 (d,  $J$  = 7.2 Hz, 2H). <sup>13</sup>C NMR (101 MHz, CDCl<sub>3</sub>,  $\delta$ ) 73.5 (CH<sub>2</sub>), 73.6 (CH<sub>2</sub>), 119.8 (CH), 121.3 (CH), 126.7 (CH), 127.3 (CH), 127.4 (CH), 128.9 (CH), 138.3 (C), 140.0 (C), 140.9 (C), 141.1 (C). EI (m/z): [M]<sup>+</sup> calcd for C<sub>14</sub>H<sub>12</sub>O: 196.0883, found: 196.0883.

**Diethyl 5-(4,6-dihydropyren-1-yl)-1,3-dihydro-2H-indene-2,2-dicarboxylate (**3w**)**

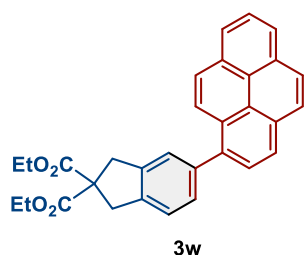

The reaction was conducted with **1a** (47.1 mg, 0.2 mmol) and **2q** (134.2 mg, 0.6 mmol). The resulting crude mixture was purified by silica-gel column chromatography (SiO<sub>2</sub>, Et<sub>2</sub>O/hexane, 0:100–10:90) to obtain **3w** in 51% yield (47.4 mg, 0.10 mmol) as a yellowish oil.

<sup>1</sup>H NMR (401 MHz, CDCl<sub>3</sub>, δ) 1.30 (t, *J* = 6.8 Hz, 6H), 3.74 (s, 4H), 4.26 (q, *J* = 6.8 Hz, 4H), 7.37 (d, *J* = 8.0 Hz, 1H), 7.40–7.46 (m, 2H), 7.94 (d, *J* = 7.6 Hz, 1H), 7.97–8.02 (m, 2H), 8.07 (s, 2H), 8.13–8.21 (m, 4H). <sup>13</sup>C NMR (101 MHz, CDCl<sub>3</sub>, δ) 14.2 (CH<sub>3</sub>), 40.5 (CH<sub>2</sub>), 40.7 (CH<sub>2</sub>), 60.6 (C), 61.9 (CH<sub>2</sub>), 124.2 (CH), 124.7 (CH), 124.9 (CH), 125.1 (CH), 125.5 (CH), 126.1 (CH), 126.4 (CH), 127.4 (CH), 127.48 (CH), 127.52 (CH), 127.7 (CH), 128.6 (C), 129.6 (CH), 130.6 (C), 131.1 (C), 131.6 (C), 137.9 (C), 139.2 (C), 140.1 (C), 140.4 (C), 171.9 (C). ESI (m/z): [M+Na]<sup>+</sup> calcd for C<sub>31</sub>H<sub>26</sub>O<sub>4</sub>Na: 485.1723, found: 485.1714.

## 11. References

- [1] A. Artigas, C. Castanyer, N. Roig, A. Lledó, M. Solà, A. Pla-Quintana, A. Roglans, *Adv. Synth. Catal.* **2021**, *363*, 3835–3844.
- [2] K. E. Ruhl, T. Rovis, *J. Am. Chem. Soc.* **2016**, *138*, 15527–15530.
- [3] N. Saino, F. Amemiya, E. Tanabe, K. Kase, S. Okamoto, *Org. Lett.* **2006**, *8*, 1439–1442.
- [4] J. García-Lacuna, G. Domínguez, J. Blanco-Urgoiti, J. Pérez-Castells, *Org. Lett.* **2018**, *20*, 5219–5223.
- [5] D. Brenna, M. Villa, T. N. Gieshoff, F. Fischer, M. Hapke, A. Jacobi von Wangelin, *Angew. Chem. Int. Ed.* **2017**, *56*, 8451–8454.
- [6] B. D. Ravetz, J. Y. Wang, K. E. Ruhl, T. Rovis, *ACS Catal.* **2019**, *9*, 200–204.



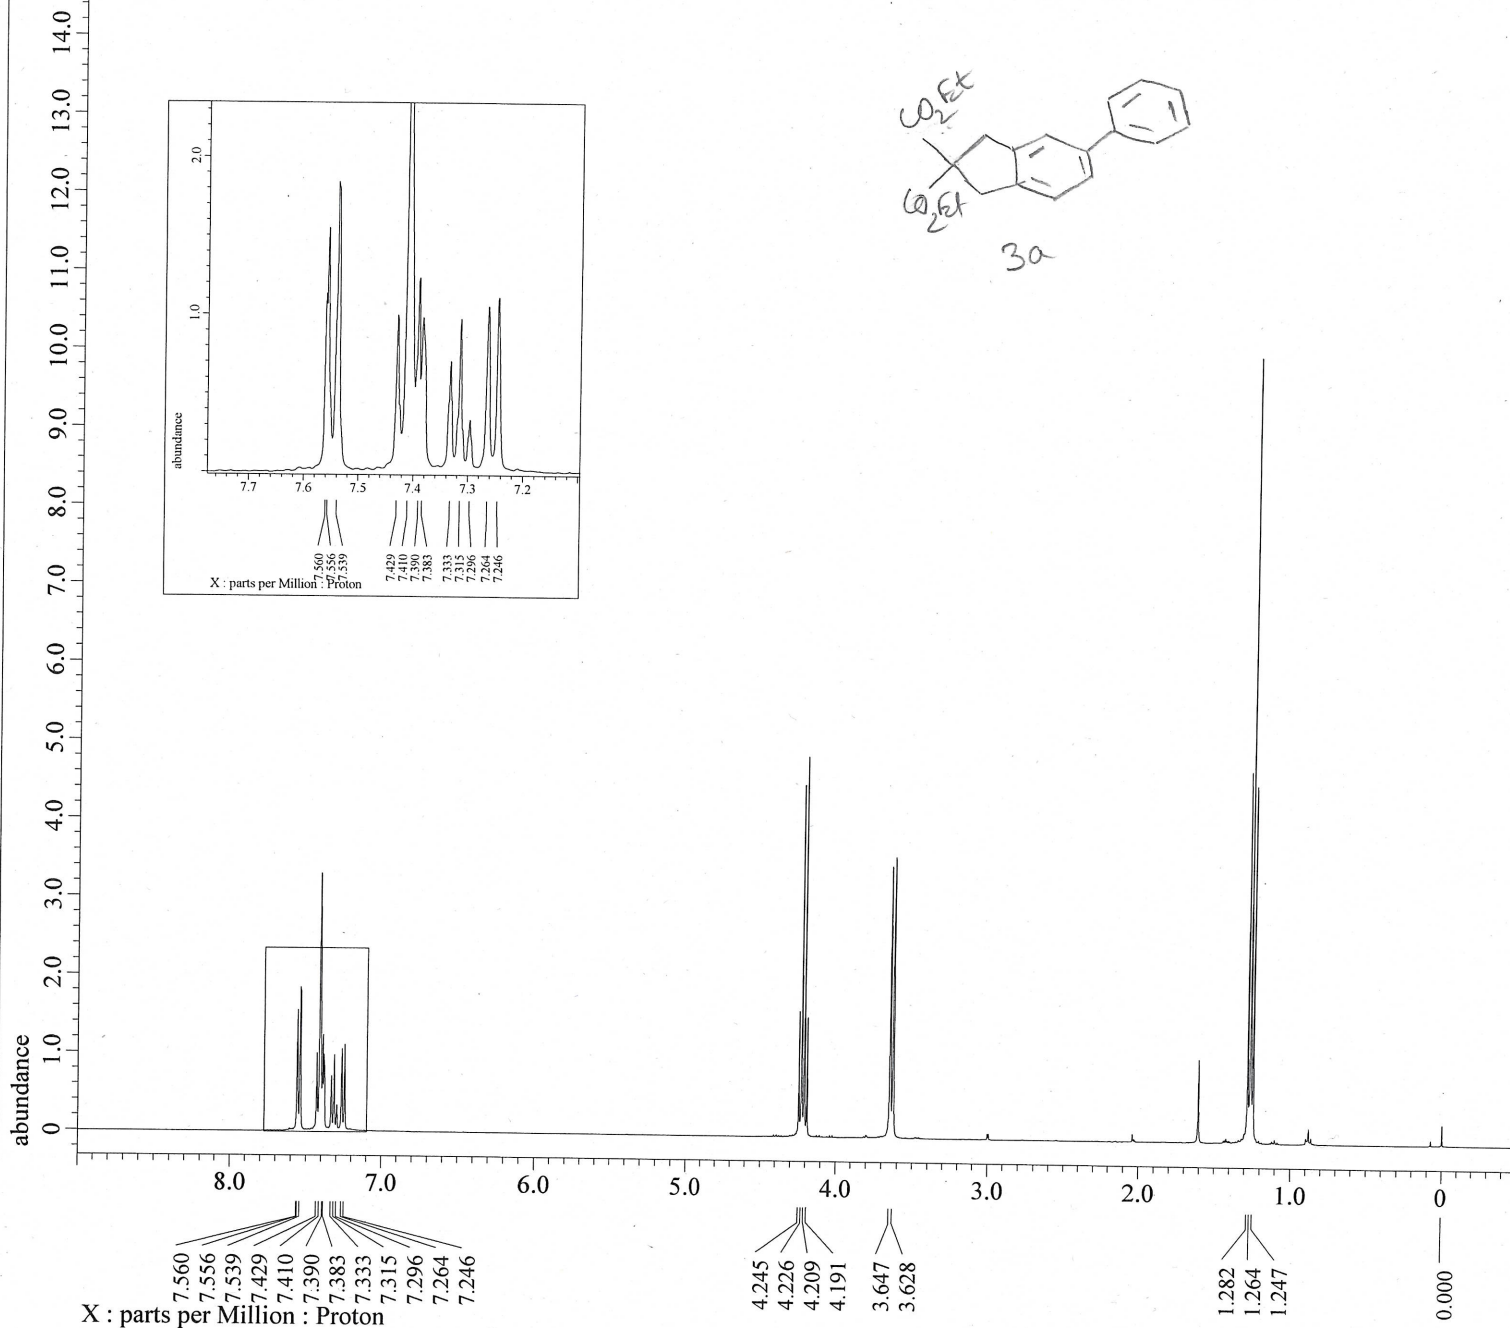

----- PROCESSING PARAMETERS -----  
 dc\_balance( 0, FALSE )  
 sexp( 0.2[Hz], 0.0[s] )  
 trapezoid( 0[%], 0[%], 80[%], 100[%] )  
 zerofill( 1 )  
 fft( 1, TRUE, TRUE )  
 machinephase  
 ppm

Derived from: Jana202pp\_Proton-1-1.jdf

Filename = Jana202pp\_Proton-1-2.jdf  
 Author = element  
 Experiment = proton.jxp  
 Sample\_Id = Jana117rp  
 Solvent = CHLOROFORM-D  
 Actual\_Start\_Time = 17-MAY-2024 12:17:18  
 Revision\_Time = 25-JUN-2024 16:48:09

Comment = single\_pulse  
 Data Format = 1D COMPLEX  
 Dim\_Size = 13107  
 X\_Domain = Proton  
 Dim\_Title = Proton  
 Dim\_Units = [ppm]  
 Dimensions = X  
 Spectrometer = DELTA2\_NMR

Field\_Strength = 9.4073814[T] (400[MHz])  
 X\_Acq\_Duration = 2.18103808[s]  
 X\_Domain = 1H  
 X\_Freq = 400.53219825[MHz]  
 X\_Offset = 5[ppm]  
 X\_Points = 16384  
 X\_Prescans = 1  
 X\_Resolution = 0.45849727[Hz]  
 X\_Sweep = 7.51201923[kHz]  
 X\_Sweep\_Clipped = 6.00961538[kHz]  
 Irr\_Domain = Proton  
 Irr\_Freq = 400.53219825[MHz]  
 Irr\_Offset = 5[ppm]  
 Tri\_Domain = Proton  
 Tri\_Freq = 400.53219825[MHz]  
 Tri\_Offset = 5[ppm]  
 Clipped = FALSE  
 Scans = 8  
 Total\_Scans = 8

Relaxation\_Delay = 5[s]  
 Recvr\_Gain = 30  
 Temp\_Get = 20.5[dc]  
 X\_90\_Width = 6.7[us]  
 X\_Acq\_Time = 2.18103808[s]  
 X\_Angle = 45[deg]  
 X\_Atn = 0.8[dB]  
 X\_Pulse = 3.35[us]  
 Irr\_Mode = Off  
 Tri\_Mode = Off  
 Dante\_Presat = FALSE  
 Initial\_Wait = 1[s]  
 Repetition\_Time = 7.18103808[s]

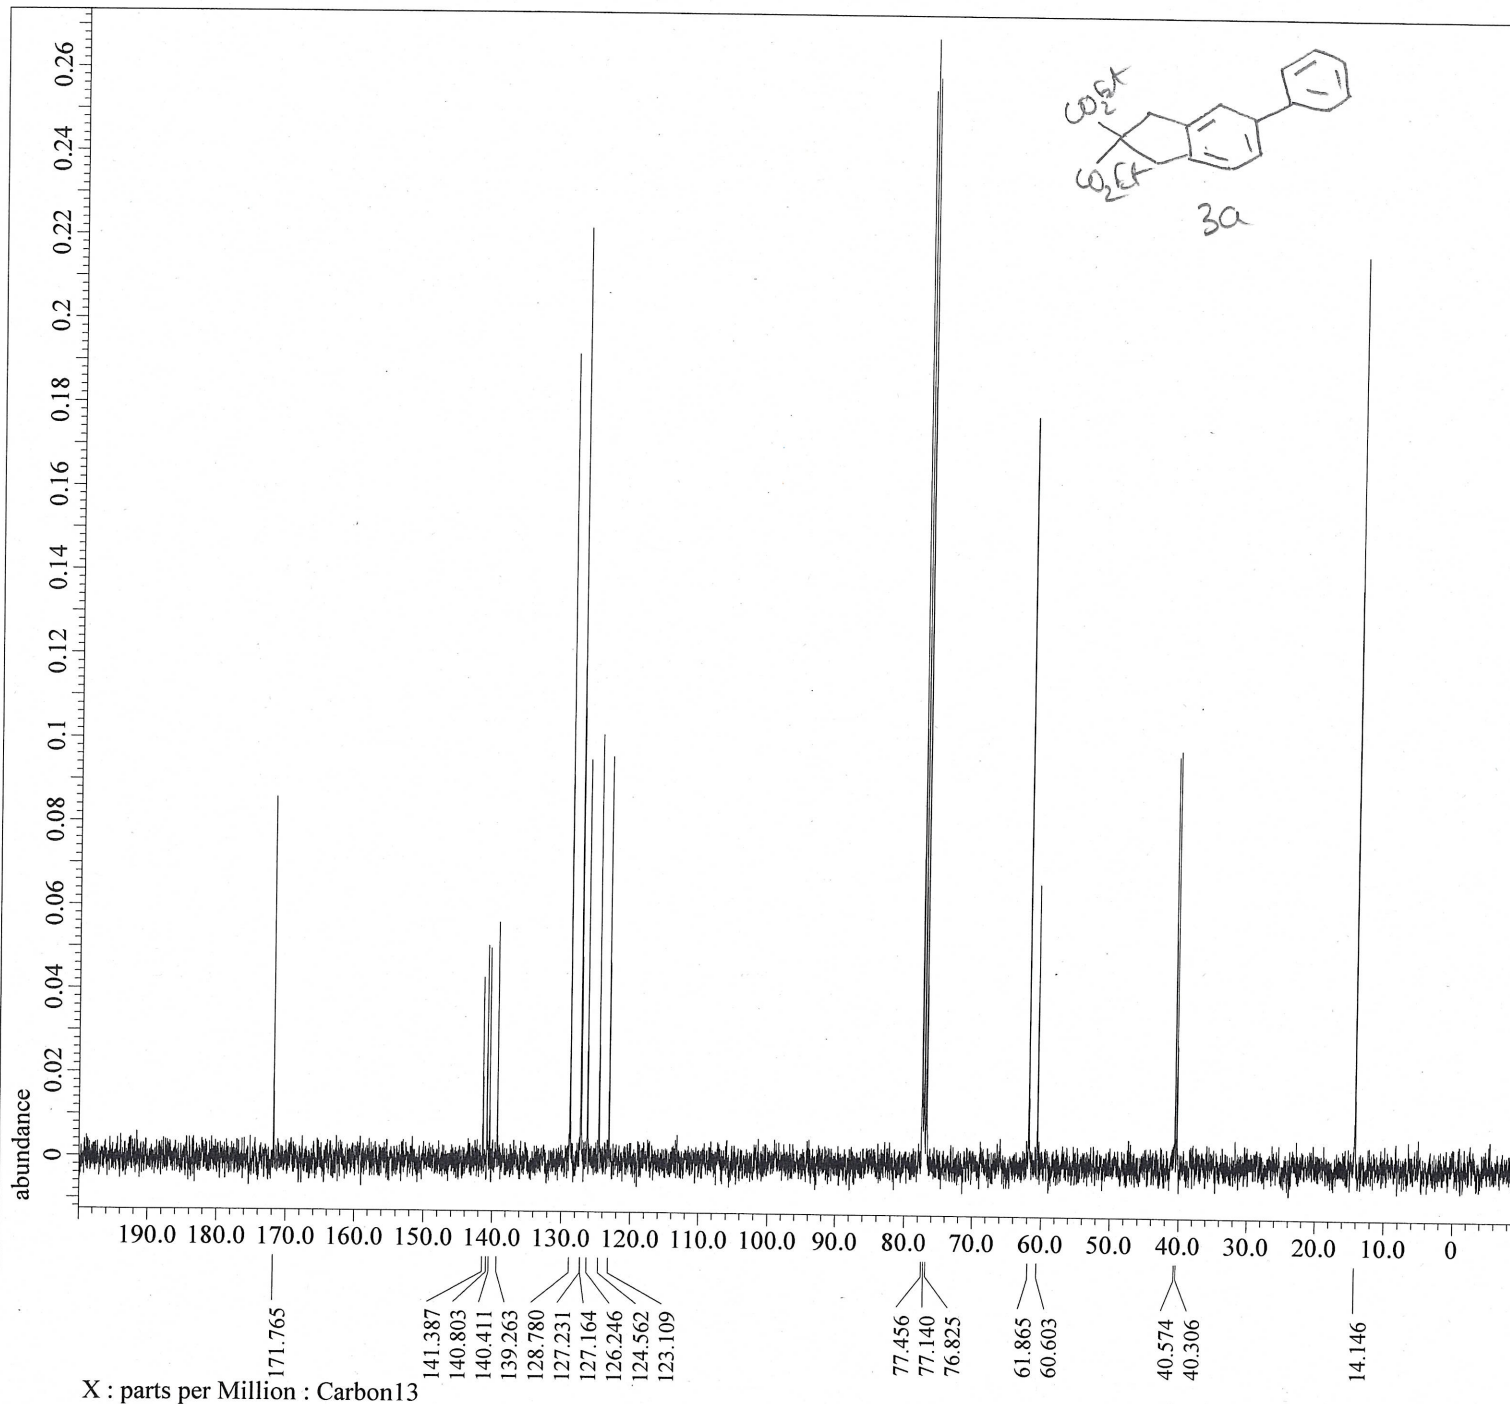

----- PROCESSING PARAMETERS -----  
 dc\_balance( 0, FALSE )  
 sexp( 2.0[Hz], 0.0[s] )  
 trapezoid( 0[%], 0[%], 80[%], 100[%] )  
 zerofill( 1 )  
 fft( 1, TRUE, TRUE )  
 machinephase  
 ppm

Derived from: Jana202pp\_Carbon-1-1.jdf

Filename = Jana202pp\_Carbon-1-2.jdf  
 Author = element  
 Experiment = carbon.jxp  
 Sample\_Id = Jana117p  
 Solvent = CHLOROFORM-D  
 Actual\_Start\_Time = 17-MAY-2024 12:31:43  
 Revision\_Time = 25-JUN-2024 16:48:24

Comment = single pulse decoupled ga  
 Data\_Format = 1D COMPLEX  
 Dim\_Size = 26214  
 X\_Domain = Carbon  
 Dim\_Title = Carbon13  
 Dim\_Units = [ppm]  
 Dimensions = X  
 Spectrometer = DELTA2\_NMR

Field\_Strength = 9.4073814[T] (400[MHz])  
 X\_Acq\_Duration = 1.03809024[s]  
 X\_Domain = 13C  
 X\_Freq = 100.71389092[MHz]  
 X\_Offset = 100[ppm]  
 X\_Points = 32768  
 X\_Prescans = 4  
 X\_Resolution = 0.96330739[Hz]  
 X\_Sweep = 31.56565657[kHz]  
 X\_Sweep\_Clipped = 25.25252525[kHz]  
 Irr\_Domain = Proton  
 Irr\_Freq = 400.53219825[MHz]  
 Irr\_Offset = 5[ppm]  
 Clipped = FALSE  
 Scans = 100  
 Total\_Scans = 100

Relaxation\_Delay = 2[s]  
 Recvr\_Gain = 50  
 Temp\_Get = 20.5[dC]  
 X\_90\_Width = 12.68[us]  
 X\_Acq\_Time = 1.03809024[s]  
 X\_Angle = 30[deg]  
 X\_Atn = 4[dB]  
 X\_Pulse = 4.22666667[us]  
 Irr\_Atn\_Dec = 26.45[dB]  
 Irr\_Atn\_Noe = 26.45[dB]  
 Irr\_Noise = WALTZ  
 Irr\_Pwidth = 0.115[ms]  
 Decoupling = TRUE  
 Initial\_Wait = 1[s]  
 Noe = TRUE  
 Noe\_Time = 2[s]  
 Repetition\_Time = 3.03809024[s]

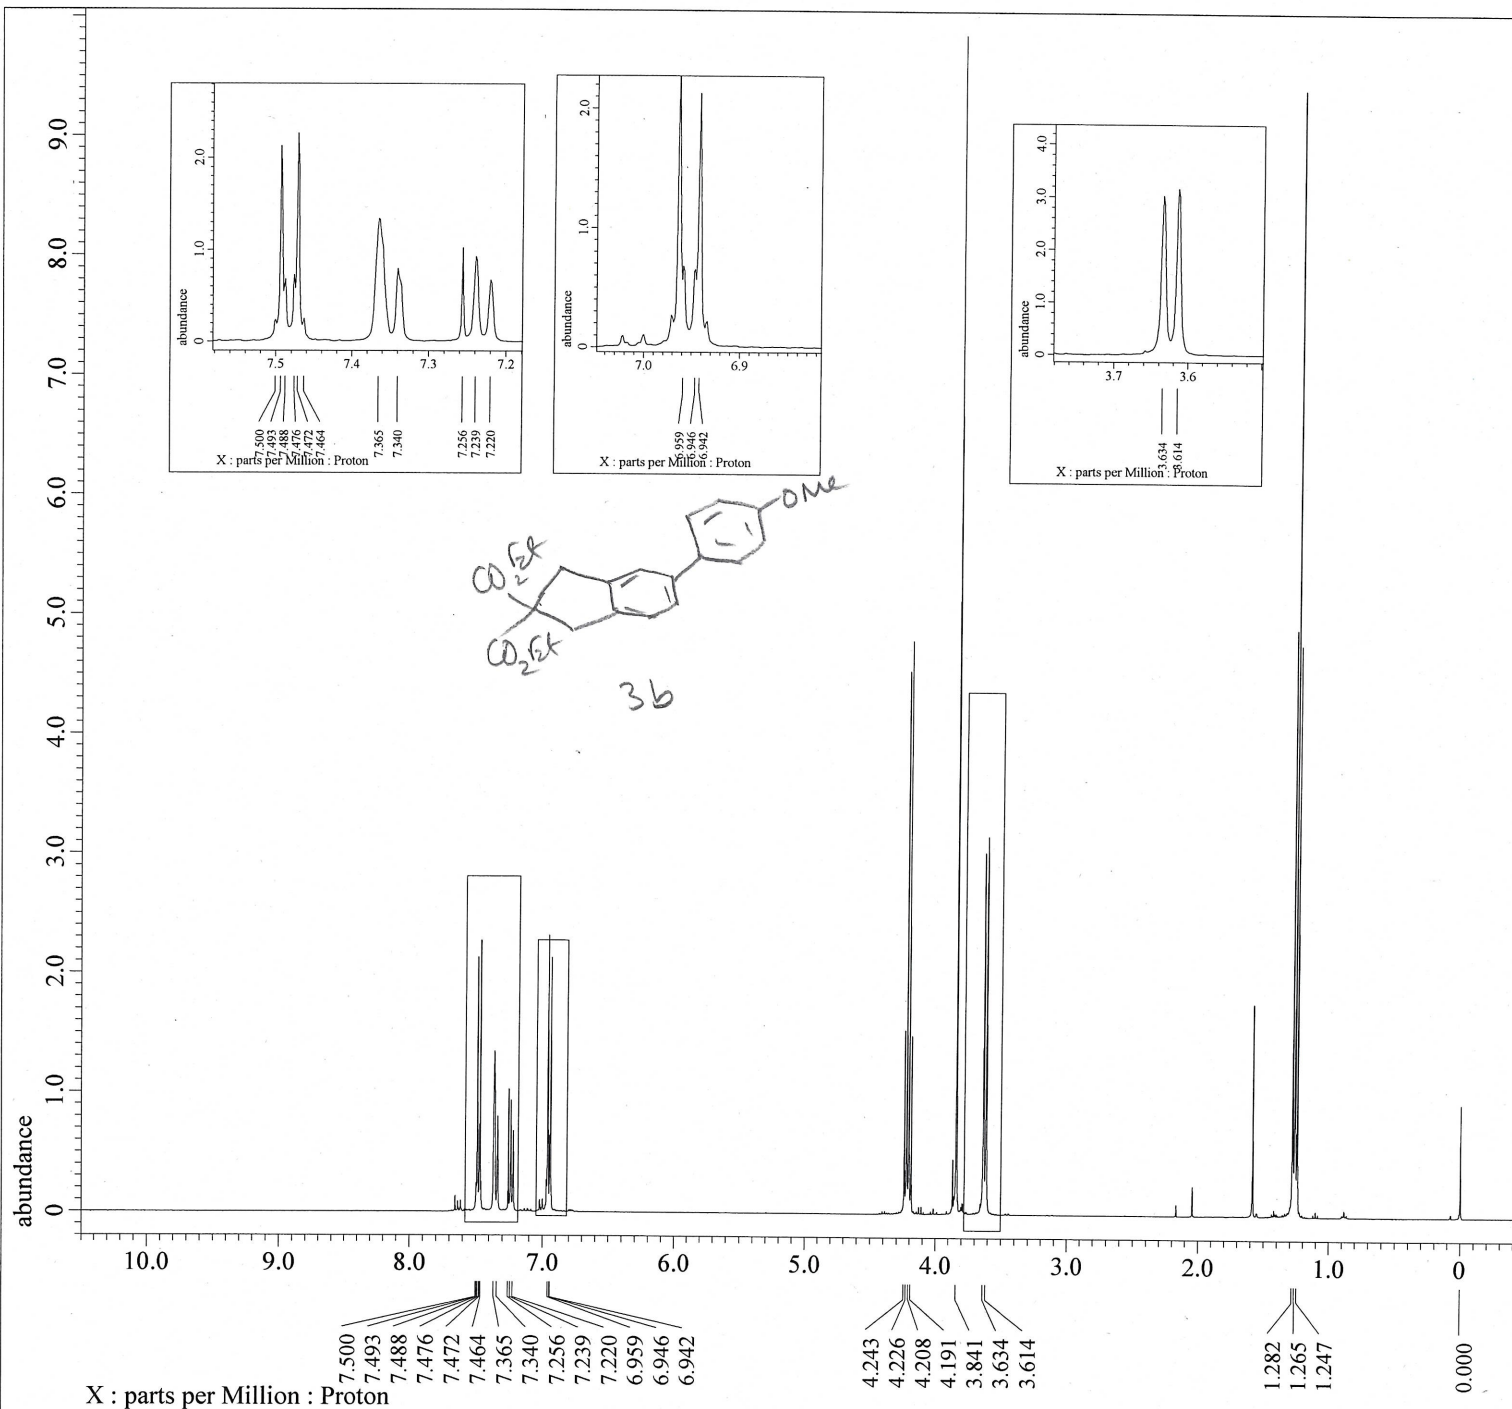

```

---- PROCESSING PARAMETERS ----
dc balance( 0, FALSE )
sexp( 0.2[Hz], 0.0[s] )
trapezoid( 0[%], 0[%], 80[%], 100[%] )
zerofill( 1 )
fft( 1, TRUE, TRUE )
machinephase
ppm

```

Derived from: Jana211\_Proton-1-1.jdf

```

Filename      = Jana211_Proton-1-2.jdf
Author       = element
Experiment    = proton.jxp
Sample_Id    = Jana211
Solvent      = CHLOROFORM-D
Actual_Start_Time = 28-MAY-2024 20:54:26
Revision_Time = 10-FEB-2025 18:01:06

```

```

Comment      = single pulse
Data Format   = 1D COMPLEX
Dim_Size     = 13107
X_Domain     = Proton
Dim_Title    = Proton
Dim Units    = [ppm]
Dimensions   = X
Spectrometer = DELTA2_NMR

```

```

Field_Strength = 9.4073814[T] (400[MHz])
X_Acq_Duration = 2.18103808[s]
X_Domain      = 1H
X_Freq        = 400.53219825 [MHz]
X_Offset      = 5[ppm]
X_Points      = 16384
X_Prescans    = 1
X_Resolution  = 0.45849727 [Hz]
X_Sweep       = 7.51201923 [kHz]
X_Sweep_Clipped = 6.00961538 [kHz]
Irr_Domain    = Proton
Irr_Freq      = 400.53219825 [MHz]
Irr_Offset    = 5[ppm]
Tri_Domain    = Proton
Tri_Freq      = 400.53219825 [MHz]
Tri_Offset    = 5[ppm]
Clipped       = FALSE
Scans         = 8
Total_Scans   = 8

```

```

Relaxation_Delay = 5[s]
Recvr_Gain       = 34
Temp_Get        = 20.3[dC]
X_90_Width      = 6.7[us]
X_Acq_Time      = 2.18103808[s]
X_Angle         = 45[deg]
X_Atn           = 0.8[dB]
X_Pulse         = 3.35[us]
Irr_Mode        = Off
Tri_Mode        = Off
Dante_Presat    = FALSE
Initial_Wait    = 1[s]
Repetition_Time = 7.18103808[s]

```



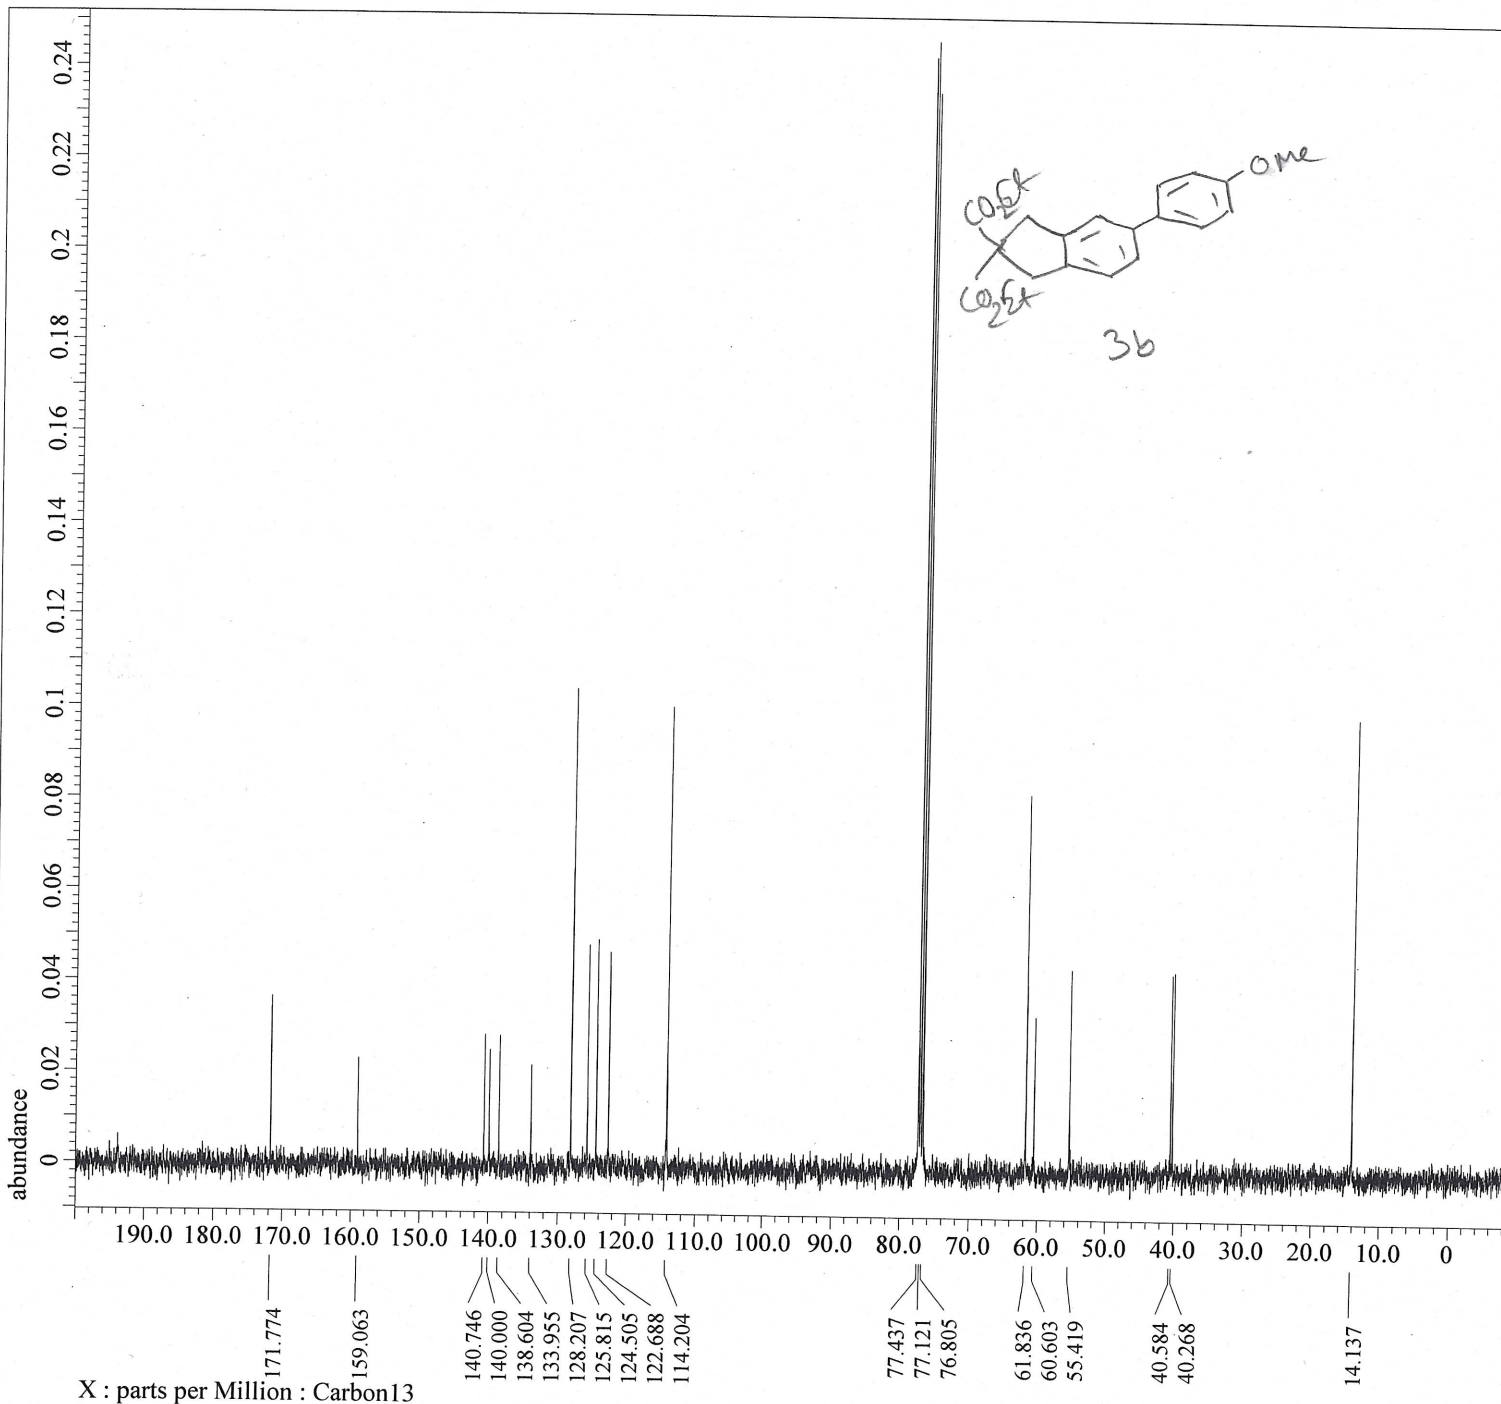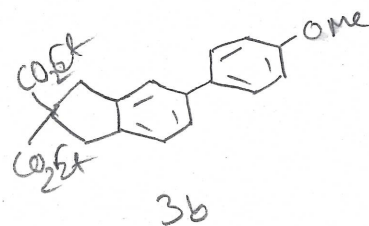

----- PROCESSING PARAMETERS -----  
dc\_balance( 0, FALSE )  
sexp( 2.0[Hz], 0.0[s] )  
trapezoid( 0[%], 0[%], 80[%], 100[%] )  
zerofill( 1 )  
fft( 1, TRUE, TRUE )  
machinephase  
ppm

Derived from: Jana211\_Carbon-1-1.jdf

Filename = Jana211\_Carbon-1-2.jdf  
Author = element  
Experiment = carbon.jxp  
Sample\_Id = Jana211  
Solvent = CHLOROFORM-D  
Actual\_Start\_Time = 28-MAY-2024 20:55:46  
Revision\_Time = 15-JUN-2024 11:23:49

Comment = single pulse decoupled ga  
Data\_Format = 1D COMPLEX  
Dim\_Size = 26214  
X\_Domain = Carbon  
Dim\_Title = Carbon13  
Dim\_Units = [ppm]  
Dimensions = X  
Spectrometer = DELTA2\_NMR

Field Strength = 9.4073814[T] (400[MHz])  
X\_Acq\_Duration = 1.03809024[s]  
X\_Domain = 13C  
X\_Freq = 100.71389092[MHz]  
X\_Offset = 100[ppm]  
X\_Points = 32768  
X\_Prescans = 4  
X\_Resolution = 0.96330739[Hz]  
X\_Sweep = 31.56565657[kHz]  
X\_Sweep\_Clipped = 25.25252525[kHz]  
Irr\_Domain = Proton  
Irr\_Freq = 400.53219825[MHz]  
Irr\_Offset = 5[ppm]  
Clipped = FALSE  
Scans = 200  
Total\_Scans = 200

Relaxation\_Delay = 2[s]  
Recvr\_Gain = 50  
Temp\_Get = 20.5[dc]  
X\_90\_Width = 12.68[us]  
X\_Acq\_Time = 1.03809024[s]  
X\_Angle = 30[deg]  
X\_Atn = 4[dB]  
X\_Pulse = 4.22666667[us]  
Irr\_Atn\_Dec = 26.45[dB]  
Irr\_Atn\_No = 26.45[dB]  
Irr\_Noise = WALTZ  
Irr\_Pwidth = 0.115[ms]  
Decoupling = TRUE  
Initial\_Wait = 1[s]  
Noe = TRUE  
Noe\_Time = 2[s]  
Repetition\_Time = 3.03809024[s]

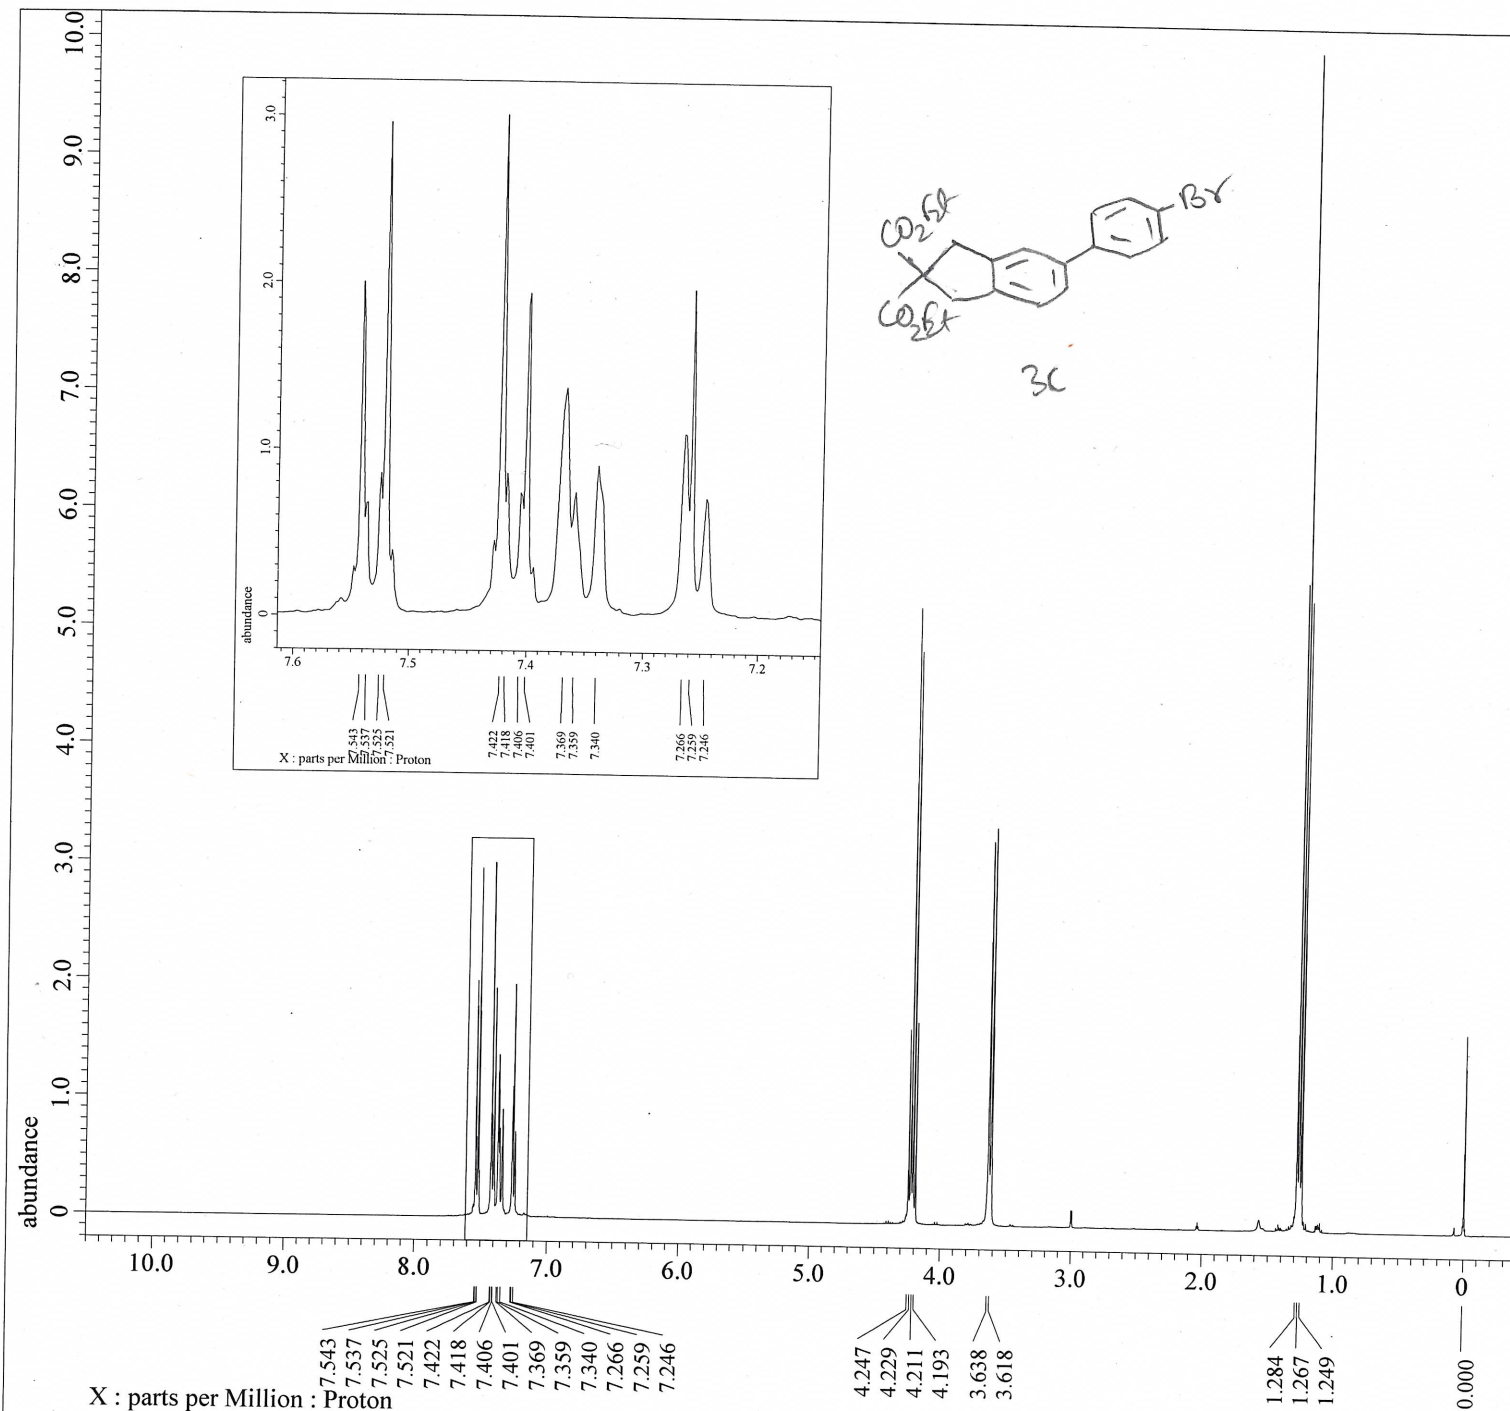

```

---- PROCESSING PARAMETERS ----
dc_balance( 0, FALSE )
sexp( 0.2[Hz], 0.0[s] )
trapezoid( 0[%], 0[%], 80[%], 100[%] )
zerofill( 1 )
fft( 1, TRUE, TRUE )
machinephase
ppm

```

Derived from: Jana221r\_Proton-1-1.jdf

```

Filename      = Jana221r_Proton-1-2.jdf
Author       = element
Experiment   = proton.jxp
Sample_Id    = Jana221r
Solvent      = CHLOROFORM-D
Actual_Start_Time = 21-FEB-2025 12:42:59
Revision_Time  = 21-FEB-2025 12:12:28

```

```

Comment      = single_pulse
Data Format   = 1D COMPLEX
Dim_Size     = 13107
X_Domain     = Proton
Dim_Title    = Proton
Dim_Units    = [ppm]
Dimensions   = X
Spectrometer = DELTA2_NMR

```

```

Field_Strength = 9.4073814[T] (400[MHz])
X_Acq_Duration = 2.18103808[s]
X_Domain      = 1H
X_Freq        = 400.53219825[MHz]
X_Offset      = 5[ppm]
X_Points      = 16384
X_Prescans    = 1
X_Resolution  = 0.45849727[Hz]
X_Sweep       = 7.51201923[kHz]
X_Sweep_Clippped = 6.00961538[kHz]
Irr_Domain    = Proton
Irr_Freq      = 400.53219825[MHz]
Irr_Offset    = 5[ppm]
Tri_Domain    = Proton
Tri_Freq      = 400.53219825[MHz]
Tri_Offset    = 5[ppm]
Clipped       = FALSE
Scans         = 8
Total_Scans   = 8

```

```

Relaxation_Delay = 5[s]
Recvr_Gain       = 38
Temp_Get         = 18.4[dc]
X_90_Width       = 6.7[us]
X_Acq_Time       = 2.18103808[s]
X_Angle          = 45[deg]
X_Atn            = 0.8[dB]
X_Pulse          = 3.35[us]
Irr_Mode         = Off
Tri_Mode         = Off
Dante_Presat     = FALSE
Initial_Wait     = 1[s]
Repetition_Time  = 7.18103808[s]

```

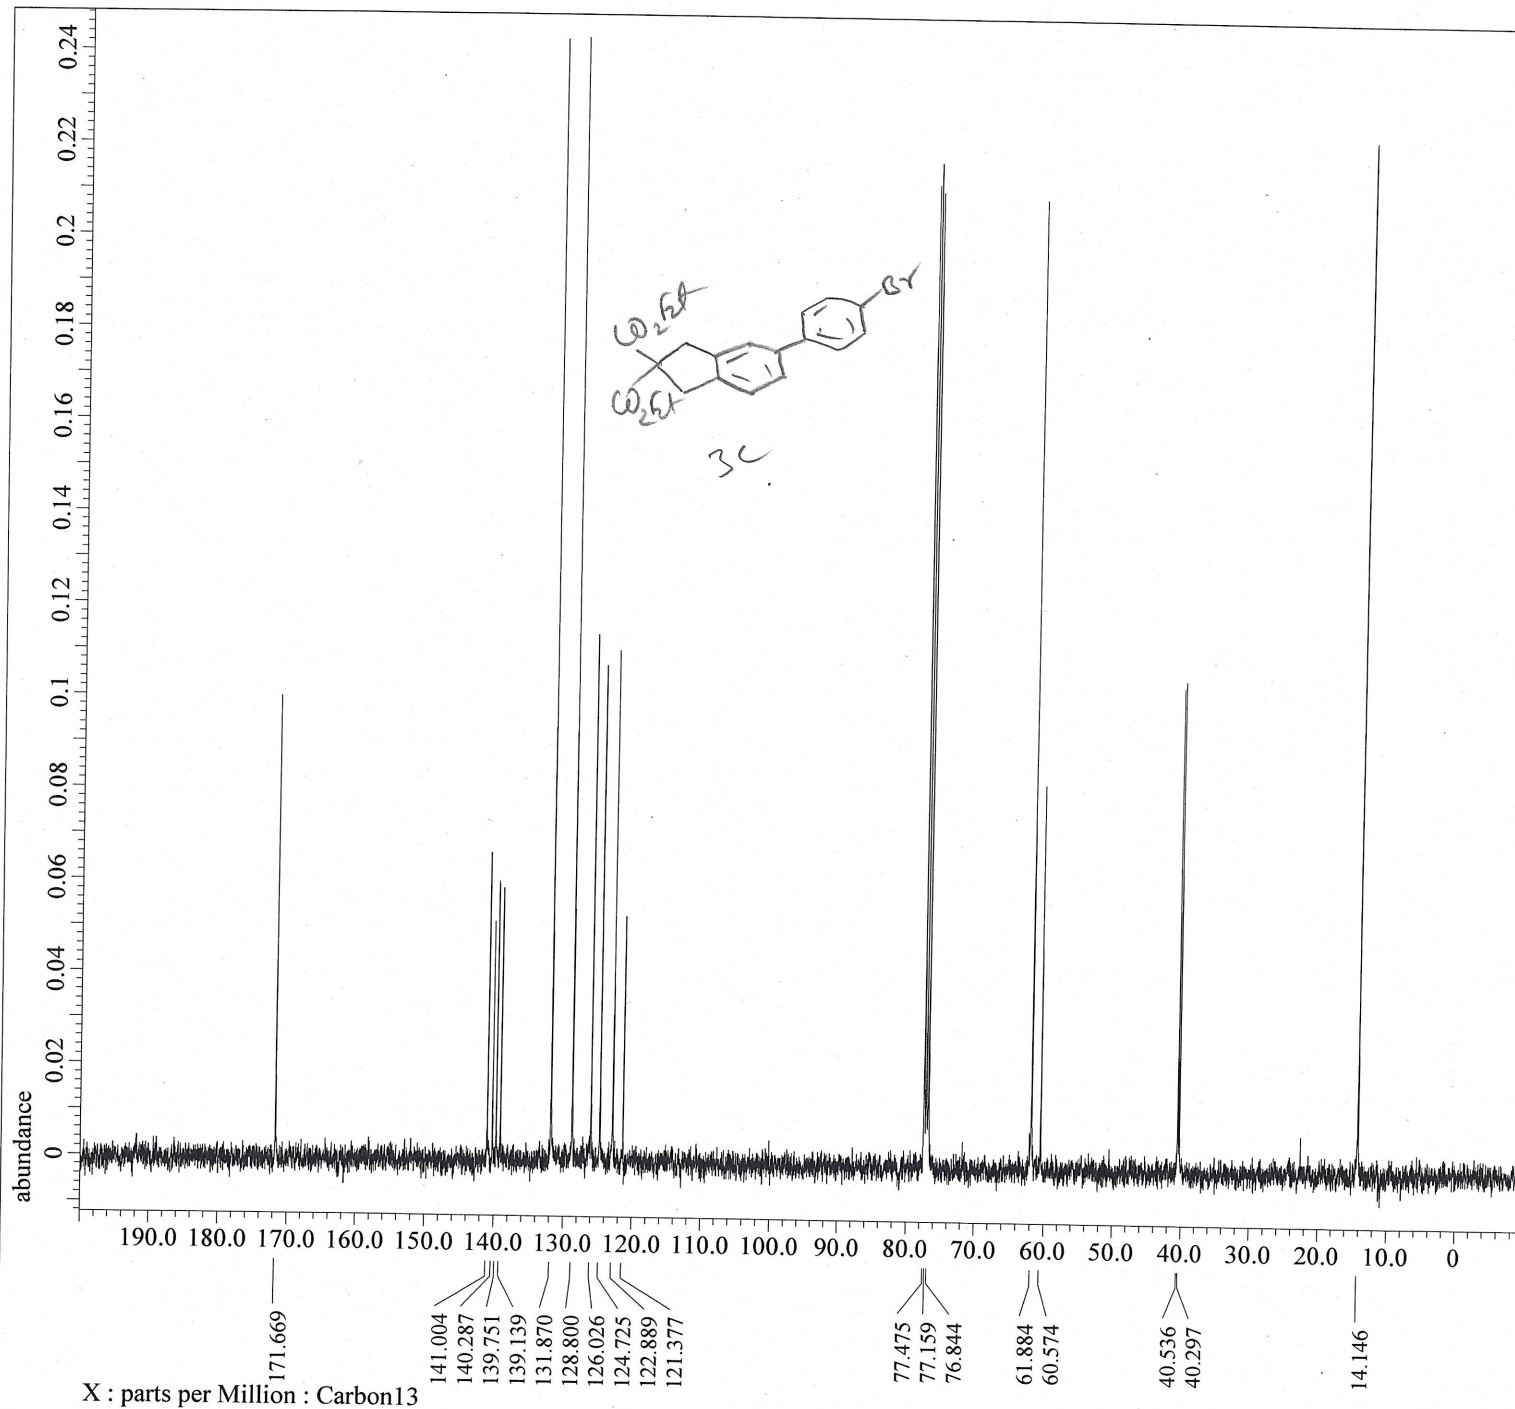

----- PROCESSING PARAMETERS -----  
 dc\_balance( 0, FALSE )  
 secp( 2.0[Hz], 0.0[s] )  
 trapezoid( 0[%], 0[%], 80[%], 100[%] )  
 zerofill( 1 )  
 fft( 1, TRUE, TRUE )  
 machinephase  
 ppm

Derived from: Jana221\_Carbon-1-1.jdf

Filename = Jana221\_Carbon-1-2.jdf  
 Author = element  
 Experiment = carbon.jxp  
 Sample\_Id = Jana221  
 Solvent = CHLOROFORM-D  
 Actual\_Start\_Time = 4-JUN-2024 16:57:51  
 Revision\_Time = 15-JUN-2024 16:19:06

Comment = single pulse decoupled ga  
 Data Format = 1D COMPLEX  
 Dim\_Size = 26214  
 X\_Domain = Carbon  
 Dim\_Title = Carbon13  
 Dim\_Units = [ppm]  
 Dimensions = X  
 Spectrometer = DELTA2\_NMR

Field Strength = 9.4073814[T] (400[MHz])  
 X\_Acq\_Duration = 1.03809024[s]  
 X\_Domain = 13C  
 X\_Freq = 100.71389092[MHz]  
 X\_Offset = 100[ppm]  
 X\_Points = 32768  
 X\_Prescans = 4  
 X\_Resolution = 0.96330739[Hz]  
 X\_Sweep = 31.56565657[kHz]  
 X\_Sweep\_Clipped = 25.25252525[kHz]  
 Irr\_Domain = Proton  
 Irr\_Freq = 400.53219825[MHz]  
 Irr\_Offset = 5[ppm]  
 Clipped = FALSE  
 Scans = 200  
 Total\_Scans = 200

Relaxation\_Delay = 2[s]  
 Recvr\_Gain = 50  
 Temp\_Get = 20.8[dC]  
 X\_90\_Width = 12.68[us]  
 X\_Acq\_Time = 1.03809024[s]  
 X\_Angle = 30[deg]  
 X\_Atn = 4[dB]  
 X\_Pulse = 4.22666667[us]  
 Irr\_Atn\_Dec = 26.45[dB]  
 Irr\_Atn\_Noise = 26.45[dB]  
 Irr\_Noise = WALTZ  
 Irr\_Pwidth = 0.115[ms]  
 Decoupling = TRUE  
 Initial\_Wait = 1[s]  
 Noe = TRUE  
 Noe\_Time = 2[s]  
 Repetition\_Time = 3.03809024[s]



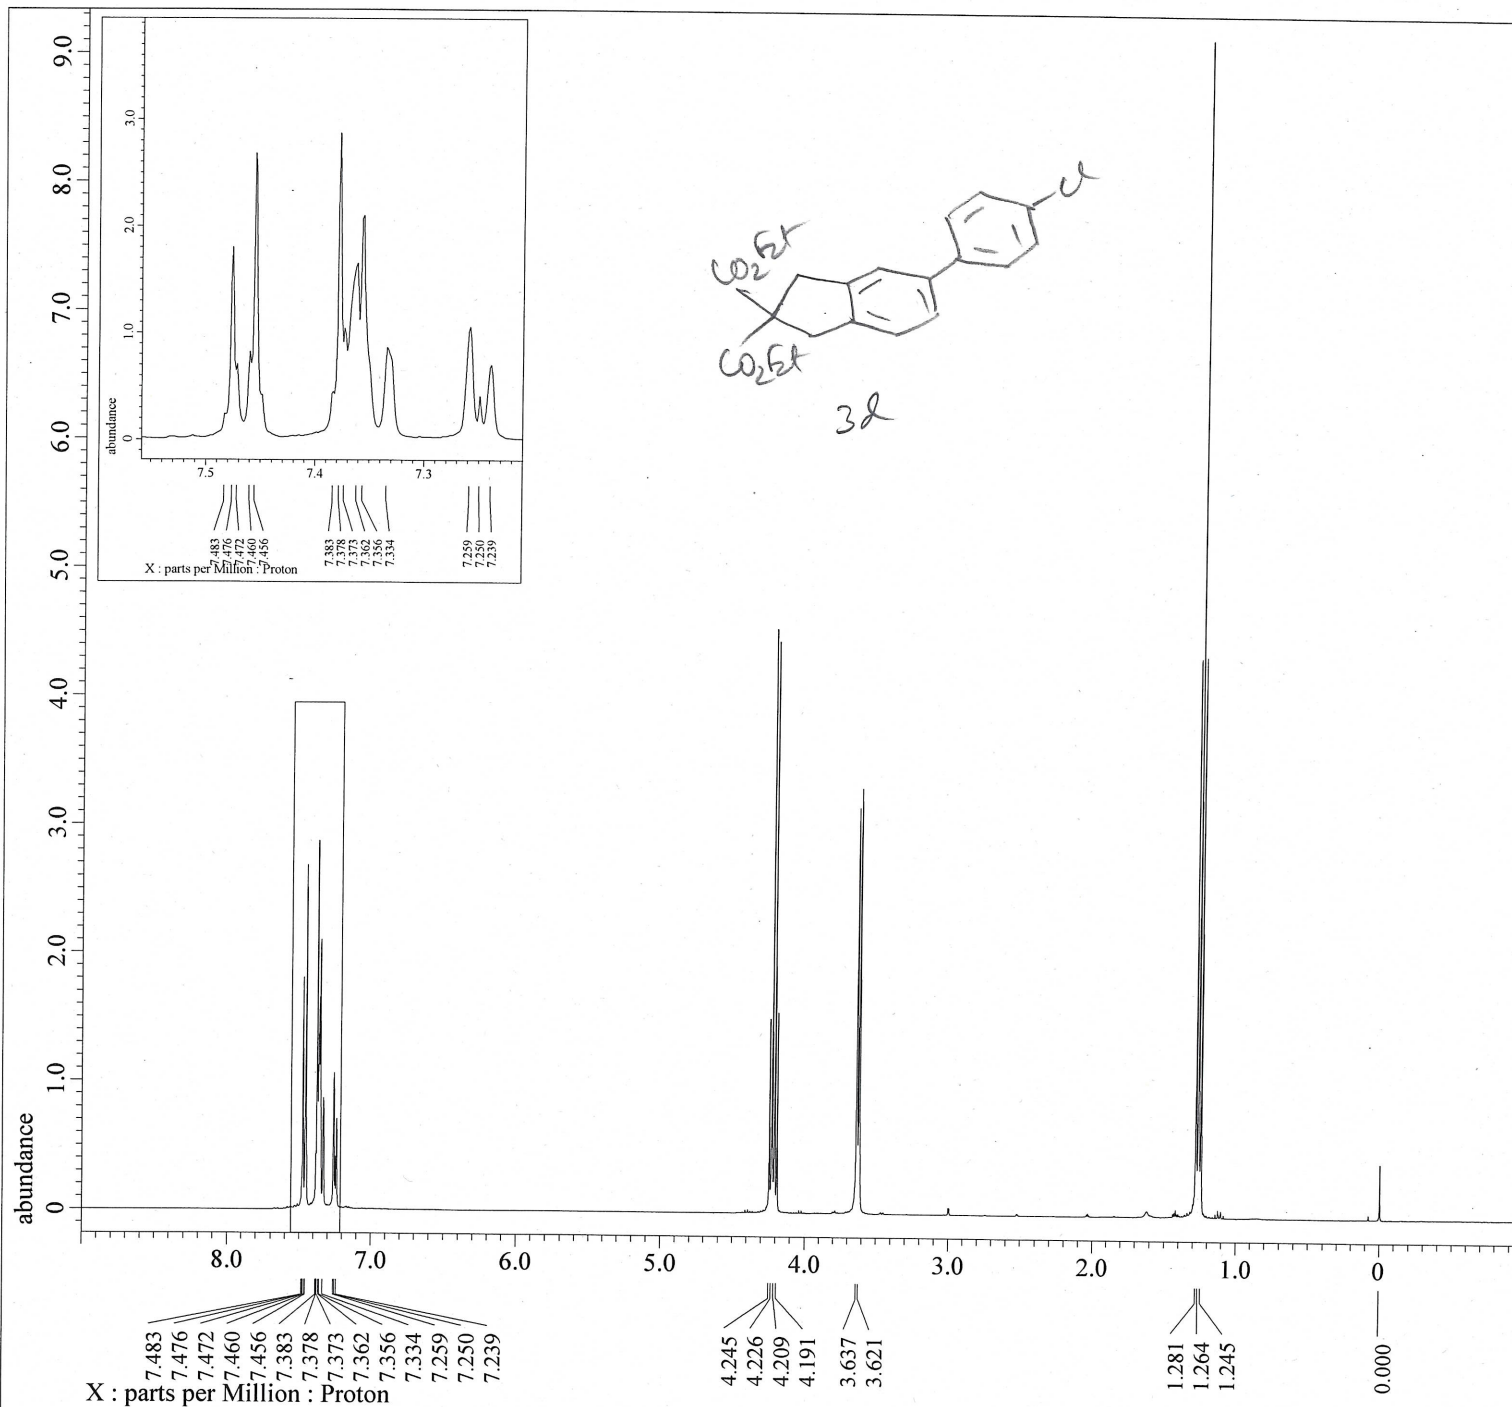

```

---- PROCESSING PARAMETERS ----
dc_balance( 0, FALSE )
sexp( 0.2[Hz], 0.0[s] )
trapezoid( 0[%], 0[%], 80[%], 100[%] )
zerofill( 1 )
fft( 1, TRUE, TRUE )
machinephase
ppm

```

Derived from: Jana223\_Proton-1-1.jdf

```

Filename      = Jana223 Proton-1-2.jdf
Author       = element
Experiment    = proton.jxp
Sample_Id     = Jana223
Solvent       = CHLOROFORM-D
Actual_Start_Time = 5-JUN-2024 20:55:19
Revision_Time = 15-JUN-2024 16:48:48

```

```

Comment       = single pulse
Data Format    = 1D COMPLEX
Dim_Size      = 13107
X_Domain      = Proton
Dim_Title     = Proton
Dim_Units     = [ppm]
Dimensions    = X
Spectrometer  = DELTA2_NMR

```

```

Field_Strength = 9.4073814[T] (400[MHz])
X_Acq_Duration = 2.18103808[s]
X_Domain       = 1H
X_Freq         = 400.53219825[MHz]
X_Offset       = 5[ppm]
X_Points       = 16384
X_Prescans     = 1
X_Resolution   = 0.45849727[Hz]
X_Sweep        = 7.51201923[kHz]
X_Sweep_Clipped = 6.00961538[kHz]
Irr_Domain     = Proton
Irr_Freq       = 400.53219825[MHz]
Irr_Offset     = 5[ppm]
Tri_Domain     = Proton
Tri_Freq       = 400.53219825[MHz]
Tri_Offset     = 5[ppm]
Clipped        = FALSE
Scans          = 8
Total_Scans    = 8

```

```

Relaxation_Delay = 5[s]
Recvr_Gain       = 26
Temp_Get         = 20[dC]
X_90_Width      = 6.7[us]
X_Acq_Time       = 2.18103808[s]
X_Angle          = 45[deg]
X_Atn            = 0.8[dB]
X_Pulse         = 3.35[us]
Irr_Mode         = Off
Tri_Mode         = Off
Dante_Presat     = FALSE
Initial_Wait     = 1[s]
Repetition_Time  = 7.18103808[s]

```

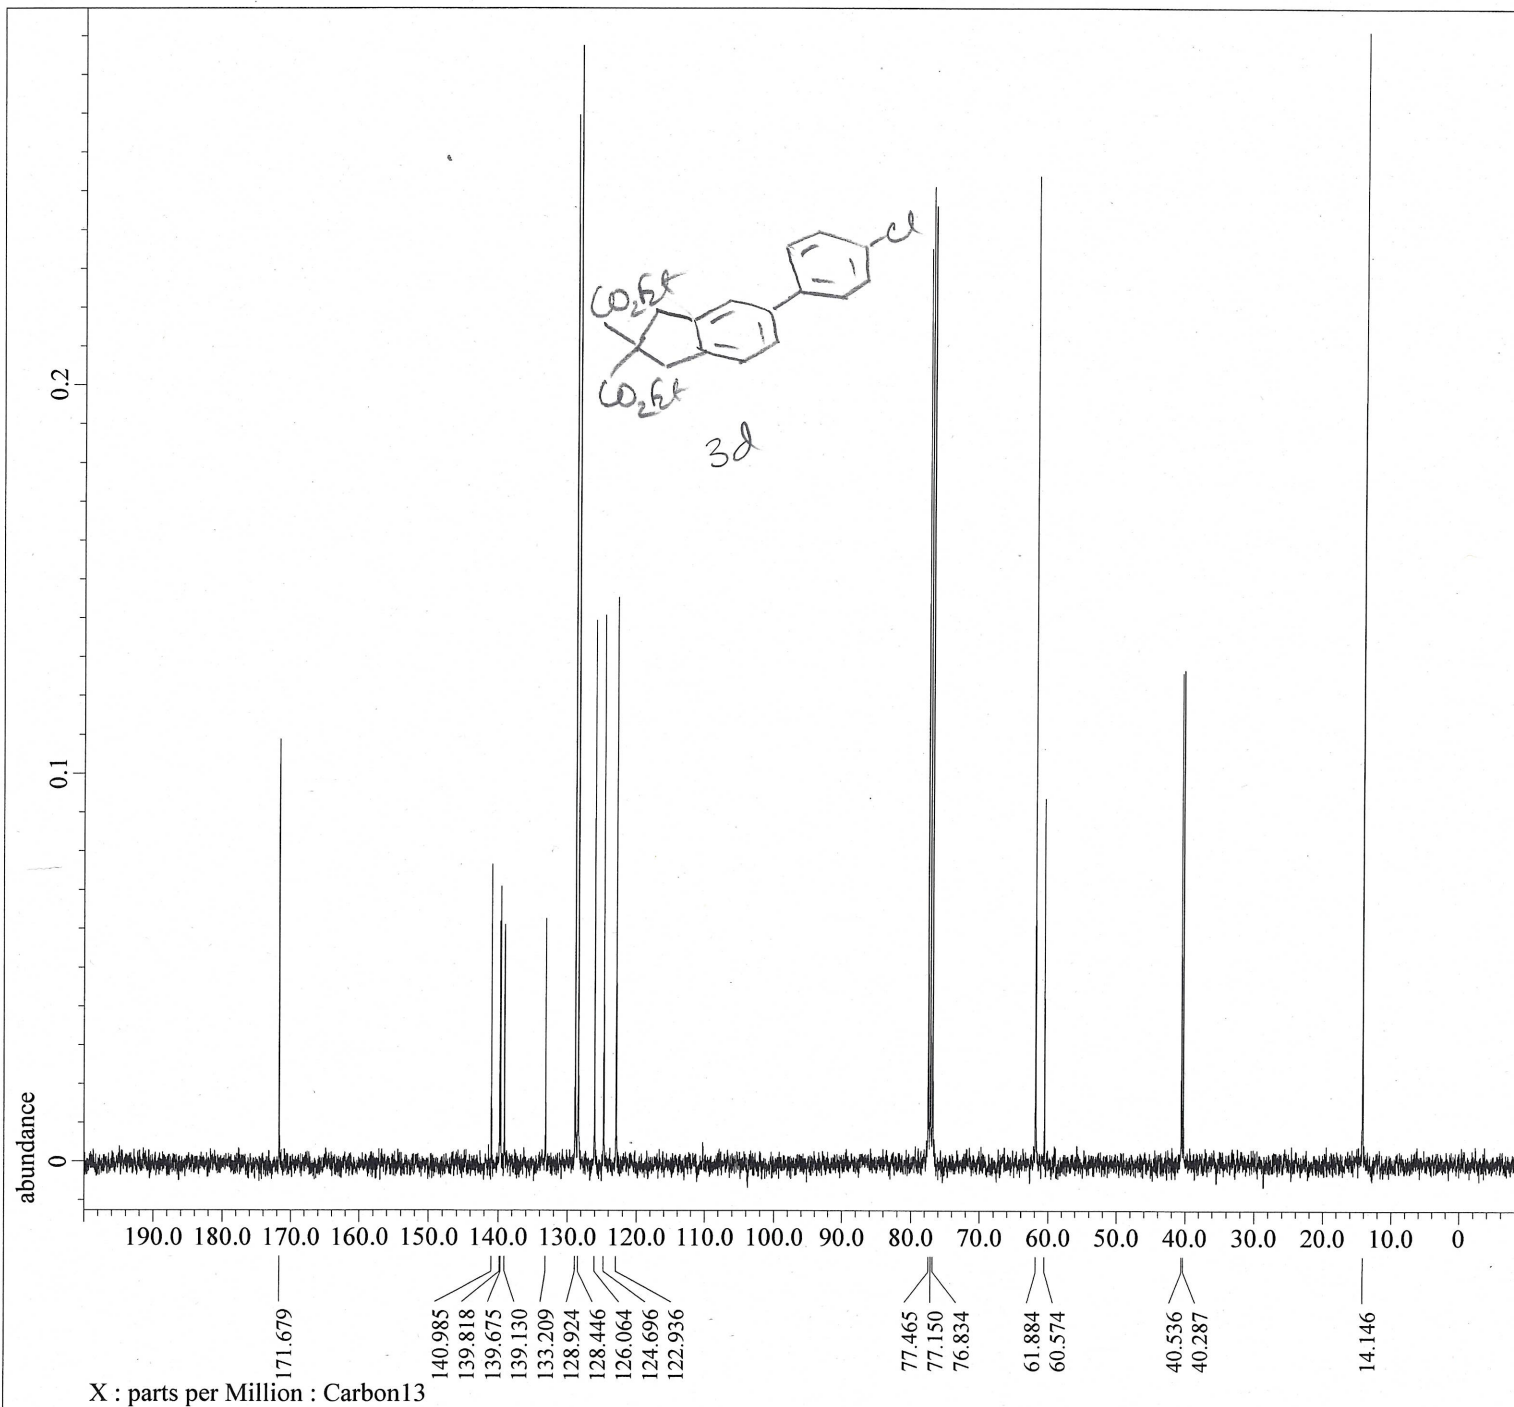

----- PROCESSING PARAMETERS -----  
 dc\_balance( 0, FALSE )  
 sexp( 2.0[Hz], 0.0[s] )  
 trapezoid( 0[%], 0[%], 80[%], 100[%] )  
 zerofill( 1 )  
 fft( 1, TRUE, TRUE )  
 machinephase  
 ppm

Derived from: Jana223\_Carbon-1-1.jdf

Filename = Jana223\_Carbon-1-2.jdf  
 Author = element  
 Experiment = carbon.jxp  
 Sample\_Id = Jana223  
 Solvent = CHLOROFORM-D  
 Actual\_Start\_Time = 5-JUN-2024 20:56:38  
 Revision\_Time = 15-JUN-2024 16:49:37

Comment = single pulse decoupled ga  
 Data\_Format = 1D COMPLEX  
 Dim\_Size = 26214  
 X\_Domain = Carbon  
 Dim\_Title = Carbon13  
 Dim\_Units = [ppm]  
 Dimensions = X  
 Spectrometer = DELTA2\_NMR

Field\_Strength = 9.4073814[T] (400[MHz])  
 X\_Acq\_Duration = 1.03809024[s]  
 X\_Domain = 13C  
 X\_Freq = 100.71389092[MHz]  
 X\_Offset = 100[ppm]  
 X\_Points = 32768  
 X\_Prescans = 4  
 X\_Resolution = 0.96330739[Hz]  
 X\_Sweep = 31.56565657[kHz]  
 X\_Sweep\_Clipped = 25.25252525[kHz]  
 Irr\_Domain = Proton  
 Irr\_Freq = 400.53219825[MHz]  
 Irr\_Offset = 5[ppm]  
 Clipped = FALSE  
 Scans = 200  
 Total\_Scans = 200

Relaxation\_Delay = 2[s]  
 Recvr\_Gain = 50  
 Temp\_Get = 19.9[dc]  
 X\_90\_Width = 12.68[us]  
 X\_Acq\_Time = 1.03809024[s]  
 X\_Angle = 30[deg]  
 X\_Atn = 4[dB]  
 X\_Pulse = 4.22666667[us]  
 Irr\_Atn\_Dec = 26.45[dB]  
 Irr\_Atn\_No = 26.45[dB]  
 Irr\_Noise = WALTZ  
 Irr\_Pwidth = 0.115[ms]  
 Decoupling = TRUE  
 Initial\_Wait = 1[s]  
 Noe = TRUE  
 Noe\_Time = 2[s]  
 Repetition\_Time = 3.03809024[s]



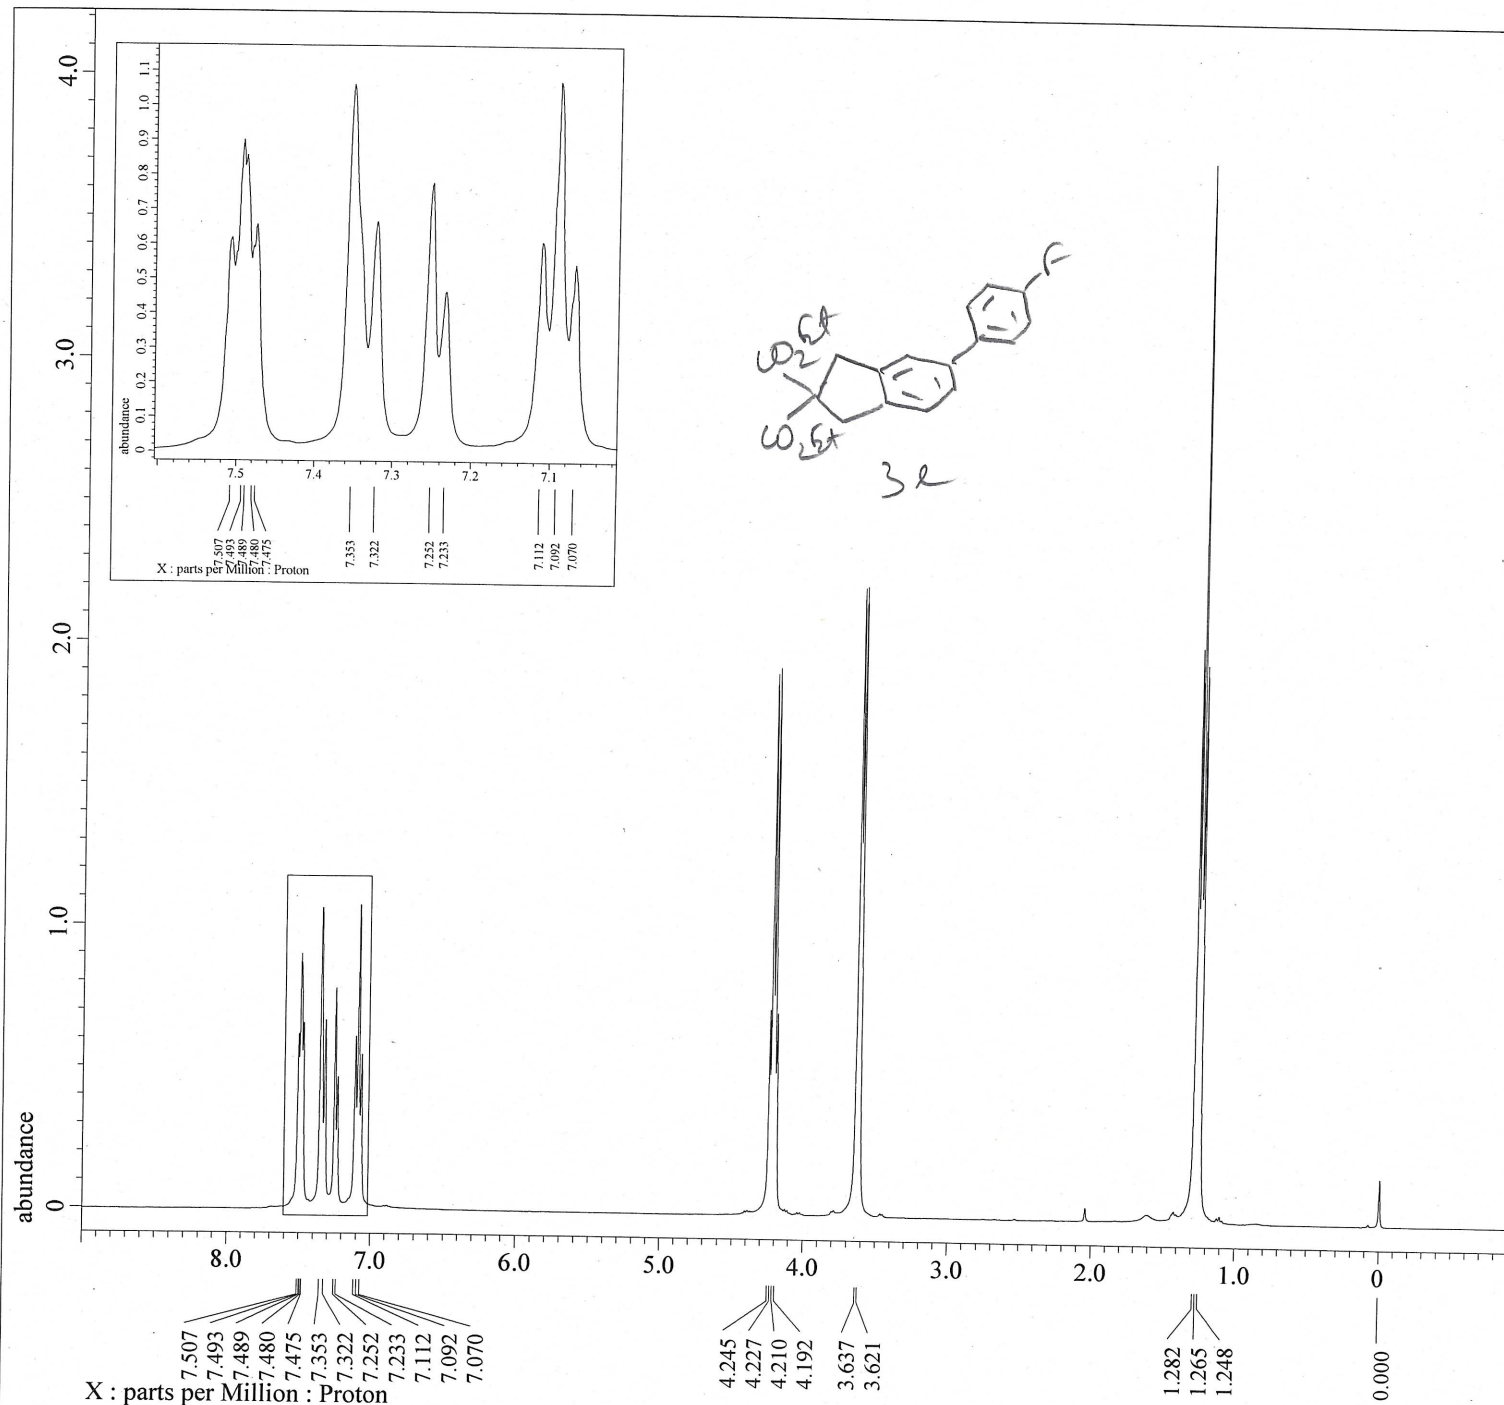

```

---- PROCESSING PARAMETERS ----
dc_balance( 0, FALSE )
sexf( 0.2[Hz], 0.0[s] )
trapezoid( 0[%], 0[%], 80[%], 100[%] )
zerofill( 1 )
fft( 1, TRUE, TRUE )
machinephase
ppm

```

Derived from: Jana212\_Proton-1-1.jdf

```

Filename      = Jana212_Proton-1-2.jdf
Author        = element
Experiment     = proton.jxp
Sample_Id     = Jana212
Solvent       = CHLOROFORM-D
Actual_Start_Time = 5-JUN-2024 16:14:27
Revision_Time  = 15-JUN-2024 13:44:45

```

```

Comment       = single pulse
Data Format    = 1D COMPLEX
Dim_Size      = 13107
X_Domain      = Proton
Dim Title     = Proton
Dim Units     = [ppm]
Dimensions    = X
Spectrometer  = DELTA2_NMR

```

```

Field Strength = 9.4073814[T] (400[MHz])
X_Acq_Duration = 2.18103808[s]
X_Domain       = 1H
X_Freq         = 400.53219825[MHz]
X_Offset       = 5[ppm]
X_Points       = 16384
X_Prescans     = 1
X_Resolution   = 0.45849727[Hz]
X_Sweep        = 7.51201923[kHz]
X_Sweep_Clipped = 6.00961538[kHz]
Irr_Domain     = Proton
Irr_Freq       = 400.53219825[MHz]
Irr_Offset     = 5[ppm]
Tri_Domain     = Proton
Tri_Freq       = 400.53219825[MHz]
Tri_Offset     = 5[ppm]
Clipped        = FALSE
Scans          = 8
Total_Scans    = 8

```

```

Relaxation_Delay = 5[s]
Recvr_Gain       = 28
Temp_Get        = 20.5[dc]
X_90_Width      = 6.7[us]
X_Acq_Time      = 2.18103808[s]
X_Angle         = 45[deg]
X_Atn           = 0.8[dB]
X_Pulse         = 3.35[us]
Irr_Mode        = Off
Tri_Mode        = Off
Dante_Presat    = FALSE
Initial_Wait    = 1[s]
Repetition_Time = 7.18103808[s]

```

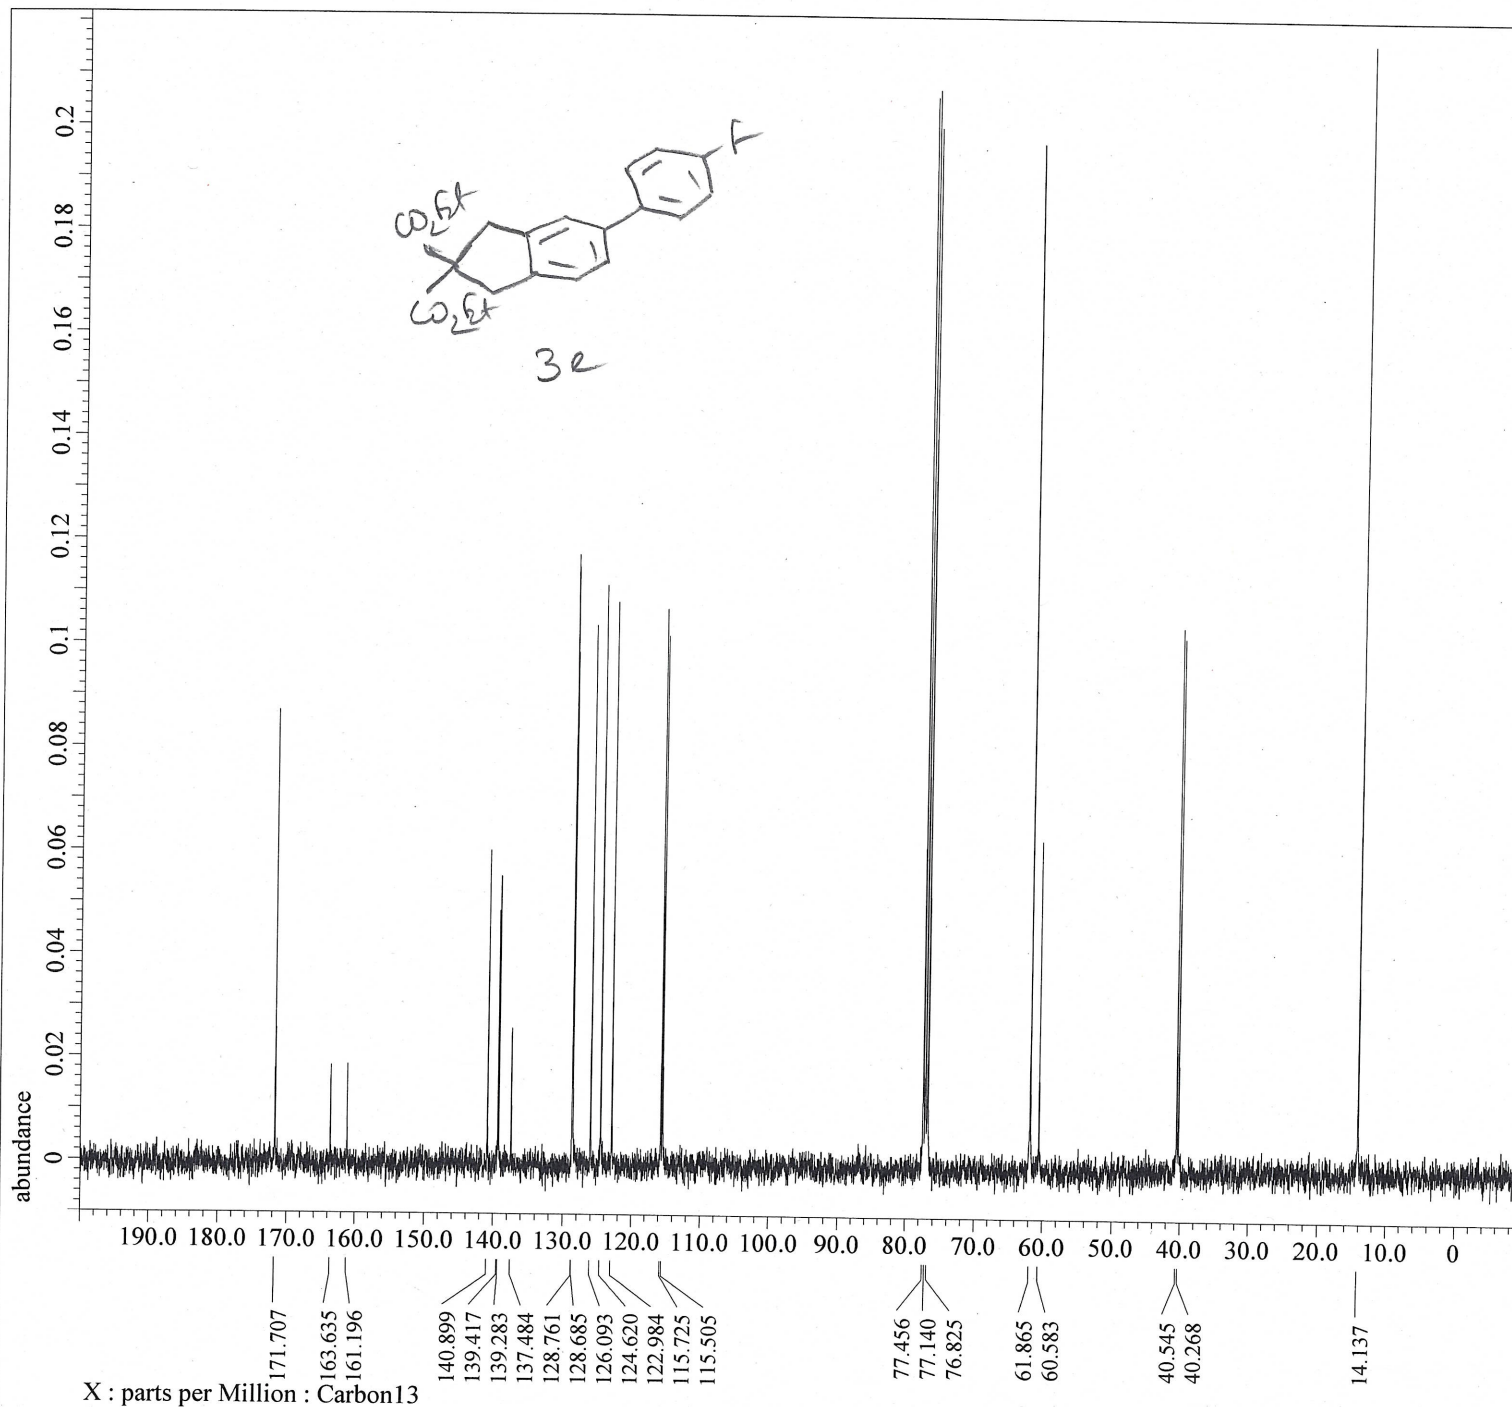

----- PROCESSING PARAMETERS -----  
 dc\_balance( 0, FALSE )  
 sexp( 2.0[Hz], 0.0[s] )  
 trapezoid( 0[%], 0[%], 80[%], 100[%] )  
 zerofill( 1 )  
 fft( 1, TRUE, TRUE )  
 machinephase  
 ppm

Derived from: Jana212\_Carbon-1-1.jdf

Filename = Jana212\_Carbon-1-2.jdf  
 Author = element  
 Experiment = carbon.jxp  
 Sample\_Id = Jana212  
 Solvent = CHLOROFORM-D  
 Actual\_Start\_Time = 5-JUN-2024 16:15:47  
 Revision\_Time = 15-JUN-2024 13:48:51

Comment = single pulse decoupled ga  
 Data\_Format = 1D COMPLEX  
 Dim\_Size = 26214  
 X\_Domain = Carbon  
 Dim\_Title = Carbon13  
 Dim\_Units = [ppm]  
 Dimensions = X  
 Spectrometer = DELTA2\_NMR

Field\_Strength = 9.4073814[T] (400[MHz])  
 X\_Acq\_Duration = 1.03809024[s]  
 X\_Domain = 13C  
 X\_Freq = 100.71389092[MHz]  
 X\_Offset = 100[ppm]  
 X\_Points = 32768  
 X\_Prescans = 4  
 X\_Resolution = 0.96330739[Hz]  
 X\_Sweep = 31.56565657[kHz]  
 X\_Sweep\_Clipped = 25.25252525[kHz]  
 Irr\_Domain = Proton  
 Irr\_Freq = 400.53219825[MHz]  
 Irr\_Offset = 5[ppm]  
 Clipped = FALSE  
 Scans = 200  
 Total\_Scans = 200

Relaxation\_Delay = 2[s]  
 Recvr\_Gain = 50  
 Temp\_Get = 20.5[dC]  
 X\_90\_Width = 12.68[us]  
 X\_Acq\_Time = 1.03809024[s]  
 X\_Angle = 30[deg]  
 X\_Atn = 4[dB]  
 X\_Pulse = 4.22666667[us]  
 Irr\_Atn\_Dec = 26.45[dB]  
 Irr\_Atn\_Noe = 26.45[dB]  
 Irr\_Noise = WALTZ  
 Irr\_Pwidth = 0.115[ms]  
 Decoupling = TRUE  
 Initial\_Wait = 1[s]  
 Noe = TRUE  
 Noe\_Time = 2[s]  
 Repetition\_Time = 3.03809024[s]

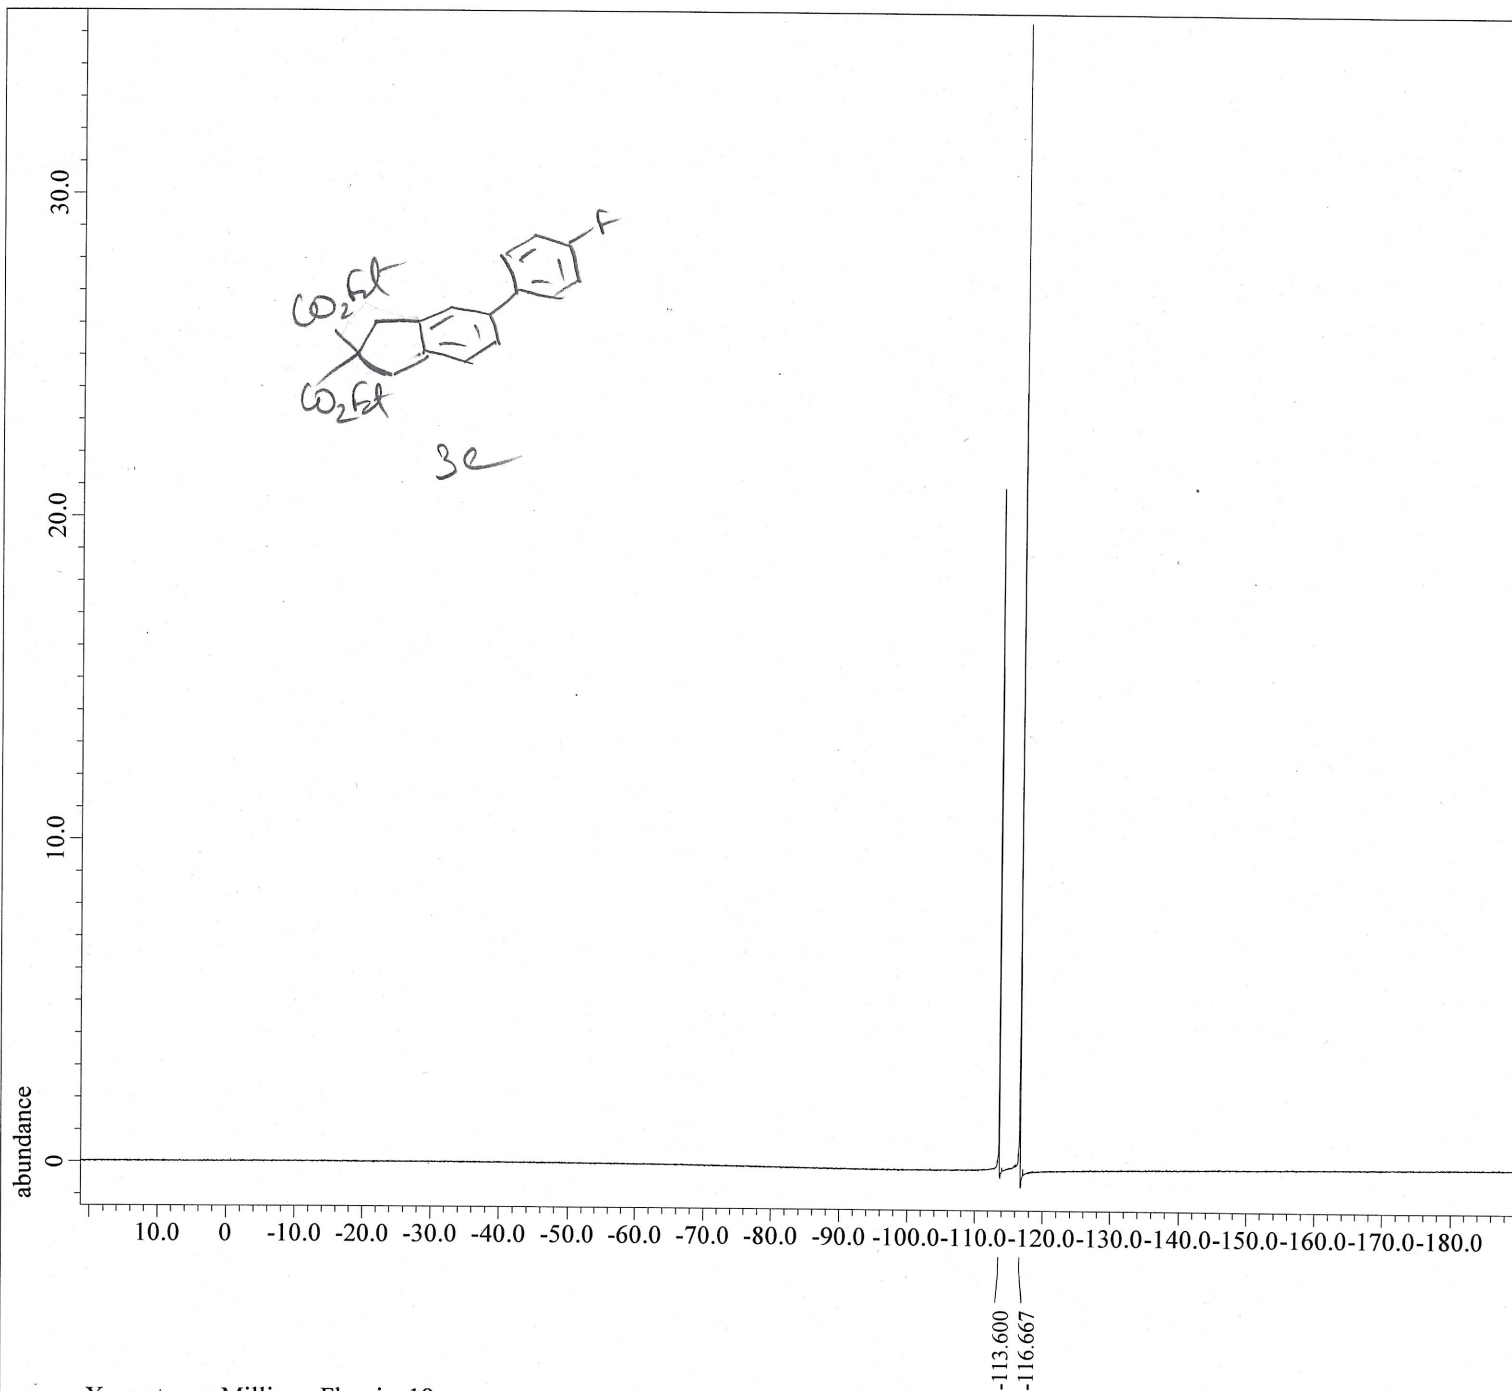

```

---- PROCESSING PARAMETERS ----
dc_balance( 0, FALSE )
sexf( 0.2[Hz], 0.0[s] )
trapezoid( 0[%], 0[%], 80[%], 100[%] )
zerofill( 1 )
fft( 1, TRUE, TRUE )
machinephase
ppm
reference( -112.96619[ppm], 0[ppm] )
reference( 0.0[ppm], -113.6[ppm] )
phase( -90.59421, 0, 78.91042[%] )

Derived from: Jana212f_single_pulse-1-1.jdf

Filename      = Jana212f_single_pulse-1-2
Author        = element
Experiment     = single_pulse.jxp
Sample_Id     = Jana212f
Solvent        = CHLOROFORM-D
Actual_Start_Time = 7-FEB-2025 18:51:07
Revision_Time  = 7-FEB-2025 18:32:40

Comment       = single_pulse
Data_Format    = 1D COMPLEX
Dim_Size       = 13107
X_Domain       = Fluori
Dim_Title      = Fluorinel9
Dim_Units      = [ppm]
Dimensions     = X
Spectrometer   = DELTA2_NMR

Field_Strength = 9.4073814[T] (400[MHz])
X_Acq_Duration = 86.50752[ms]
X_Domain       = 19F
X_Freq         = 376.87675879[MHz]
X_Offset       = 0[ppm]
X_Points       = 16384
X_Prescans     = 1
X_Resolution   = 11.55968868[Hz]
X_Sweep        = 189.39393939[kHz]
X_Sweep_Clippped = 151.51515152[kHz]
Irr_Domain     = Fluorinel9
Irr_Freq       = 376.87675879[MHz]
Irr_Offset     = 5[ppm]
Tri_Domain     = Fluorinel9
Tri_Freq       = 376.87675879[MHz]
Tri_Offset     = 5[ppm]
Clipped        = FALSE
Scans          = 8
Total_Scans    = 8

Relaxation_Delay = 5[s]
Recvr_Gain       = 46
Temp_Get         = 18.3[dC]
X_90_Width      = 7.59[us]
X_Acq_Time       = 86.50752[ms]
X_Angle         = 45[deg]
X_Atn           = 3[dB]
X_Pulse         = 3.795[us]
Irr_Mode        = Off
Tri_Mode        = Off
Dante_Presat    = FALSE
Initial_Wait     = 1[s]
Repetition_Time = 5.08650752[s]

```

X : parts per Million : Fluorine19

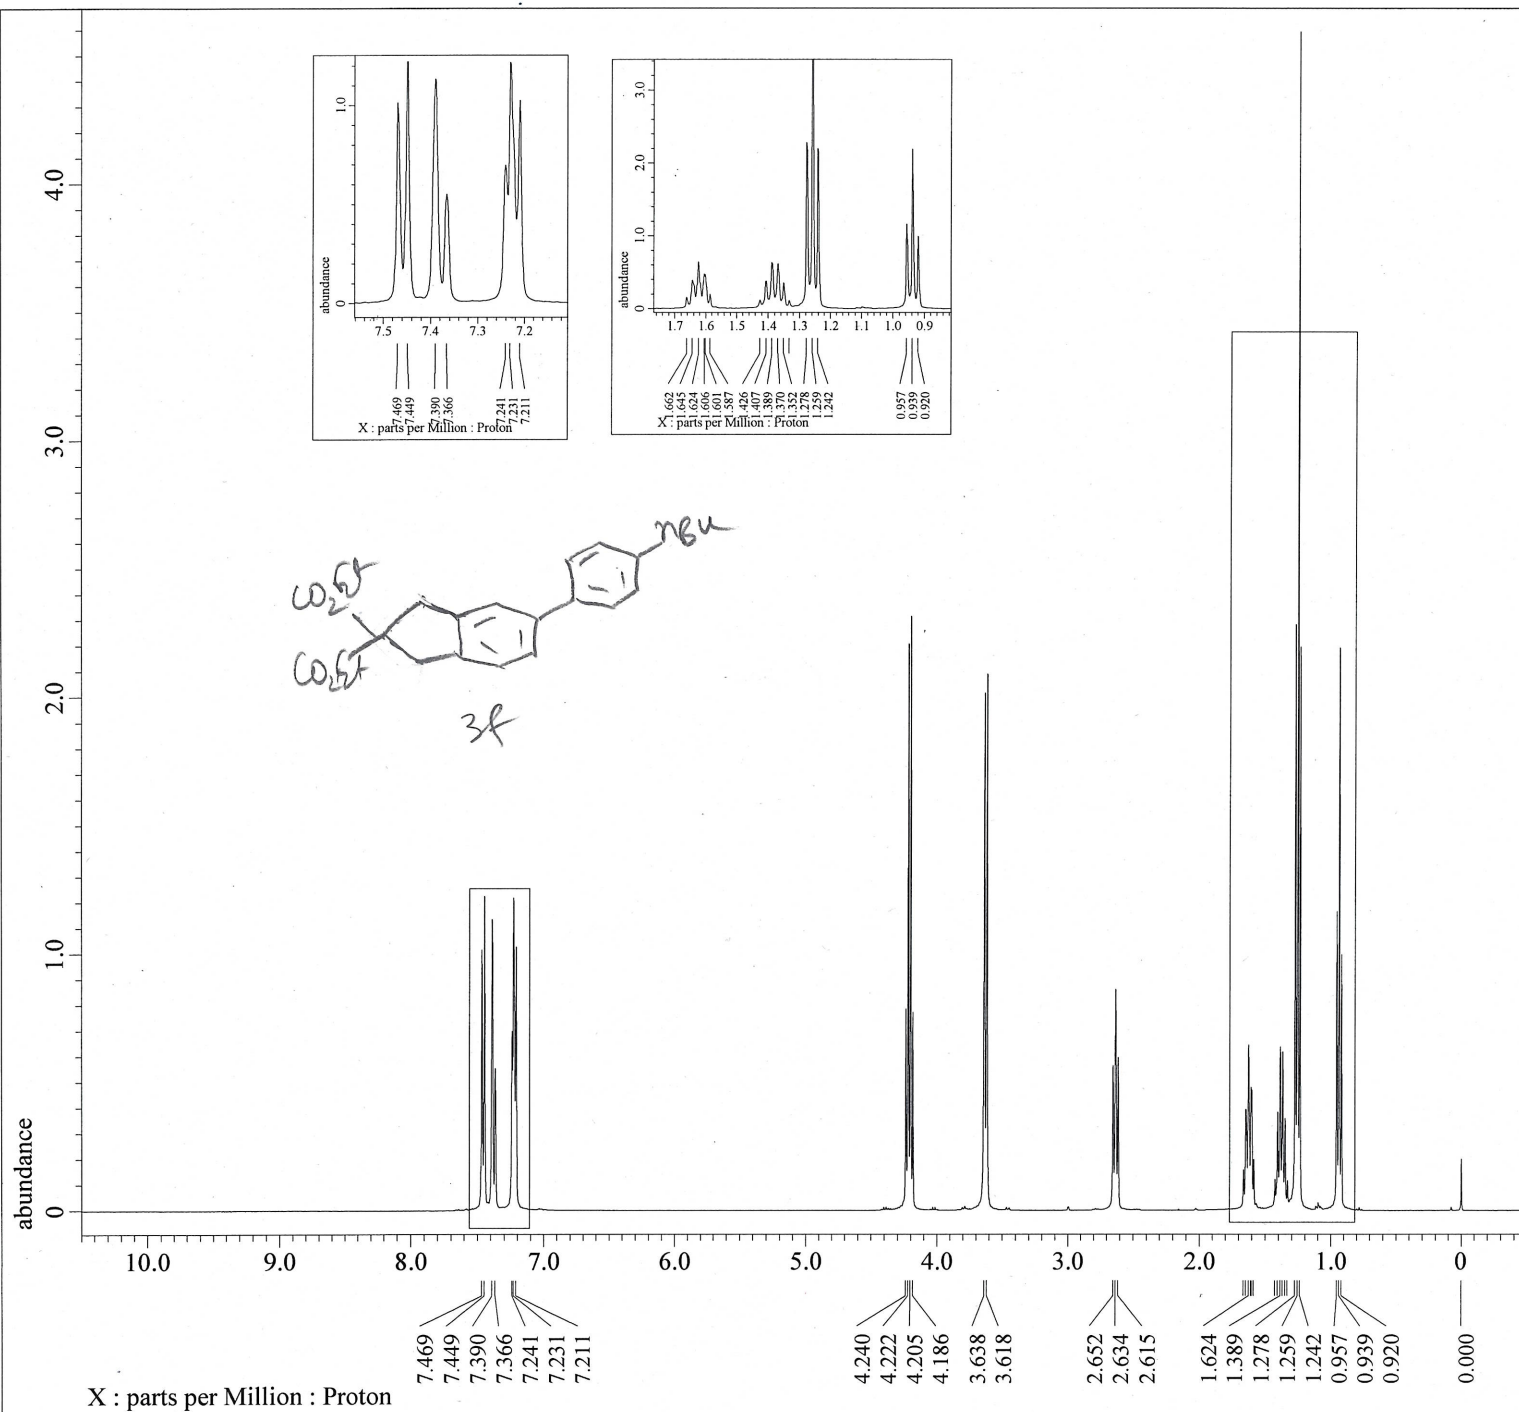

----- PROCESSING PARAMETERS -----  
 dc\_balance( 0, FALSE )  
 sexp( 0.2[Hz], 0.0[s] )  
 trapezoid( 0[%], 0[%], 80[%], 100[%] )  
 zerofill( 1 )  
 fft( 1, TRUE, TRUE )  
 machinephase  
 ppm

Derived from: Jana225\_Proton-1-1.jdf

Filename = Jana225\_Proton-1-2.jdf  
 Author = element  
 Experiment = proton.jxp  
 Sample Id = Jana225  
 Solvent = CHLOROFORM-D  
 Actual\_Start\_Time = 7-JUN-2024 13:53:54  
 Revision\_Time = 10-FEB-2025 20:18:56

Comment = single\_pulse  
 Data\_Format = 1D\_COMPLEX  
 Dim\_Size = 13107  
 X\_Domain = Proton  
 Dim\_Title = Proton  
 Dim\_Units = [ppm]  
 Dimensions = X  
 Spectrometer = DELTA2\_NMR

Field\_Strength = 9.4073814[T] (400[MHz])  
 X\_Acq\_Duration = 2.18103808[s]  
 X\_Domain = 1H  
 X\_Freq = 400.53219825[MHz]  
 X\_Offset = 5[ppm]  
 X\_Points = 16384  
 X\_Prescans = 1  
 X\_Resolution = 0.45849727[Hz]  
 X\_Sweep = 7.51201923[kHz]  
 X\_Sweep\_Clipped = 6.00961538[kHz]  
 Irr\_Domain = Proton  
 Irr\_Freq = 400.53219825[MHz]  
 Irr\_Offset = 5[ppm]  
 Tri\_Domain = Proton  
 Tri\_Freq = 400.53219825[MHz]  
 Tri\_Offset = 5[ppm]  
 Clipped = FALSE  
 Scans = 8  
 Total\_Scans = 8

Relaxation\_Delay = 5[s]  
 Recvr\_Gain = 24  
 Temp\_Get = 20.8[dc]  
 X\_90\_Width = 6.7[us]  
 X\_Acq\_Time = 2.18103808[s]  
 X\_Angle = 45[deg]  
 X\_Atn = 0.8[dB]  
 X\_Pulse = 3.35[us]  
 Irr\_Mode = Off  
 Tri\_Mode = Off  
 Dante\_Presat = FALSE  
 Initial\_Wait = 1[s]  
 Repetition\_Time = 7.18103808[s]



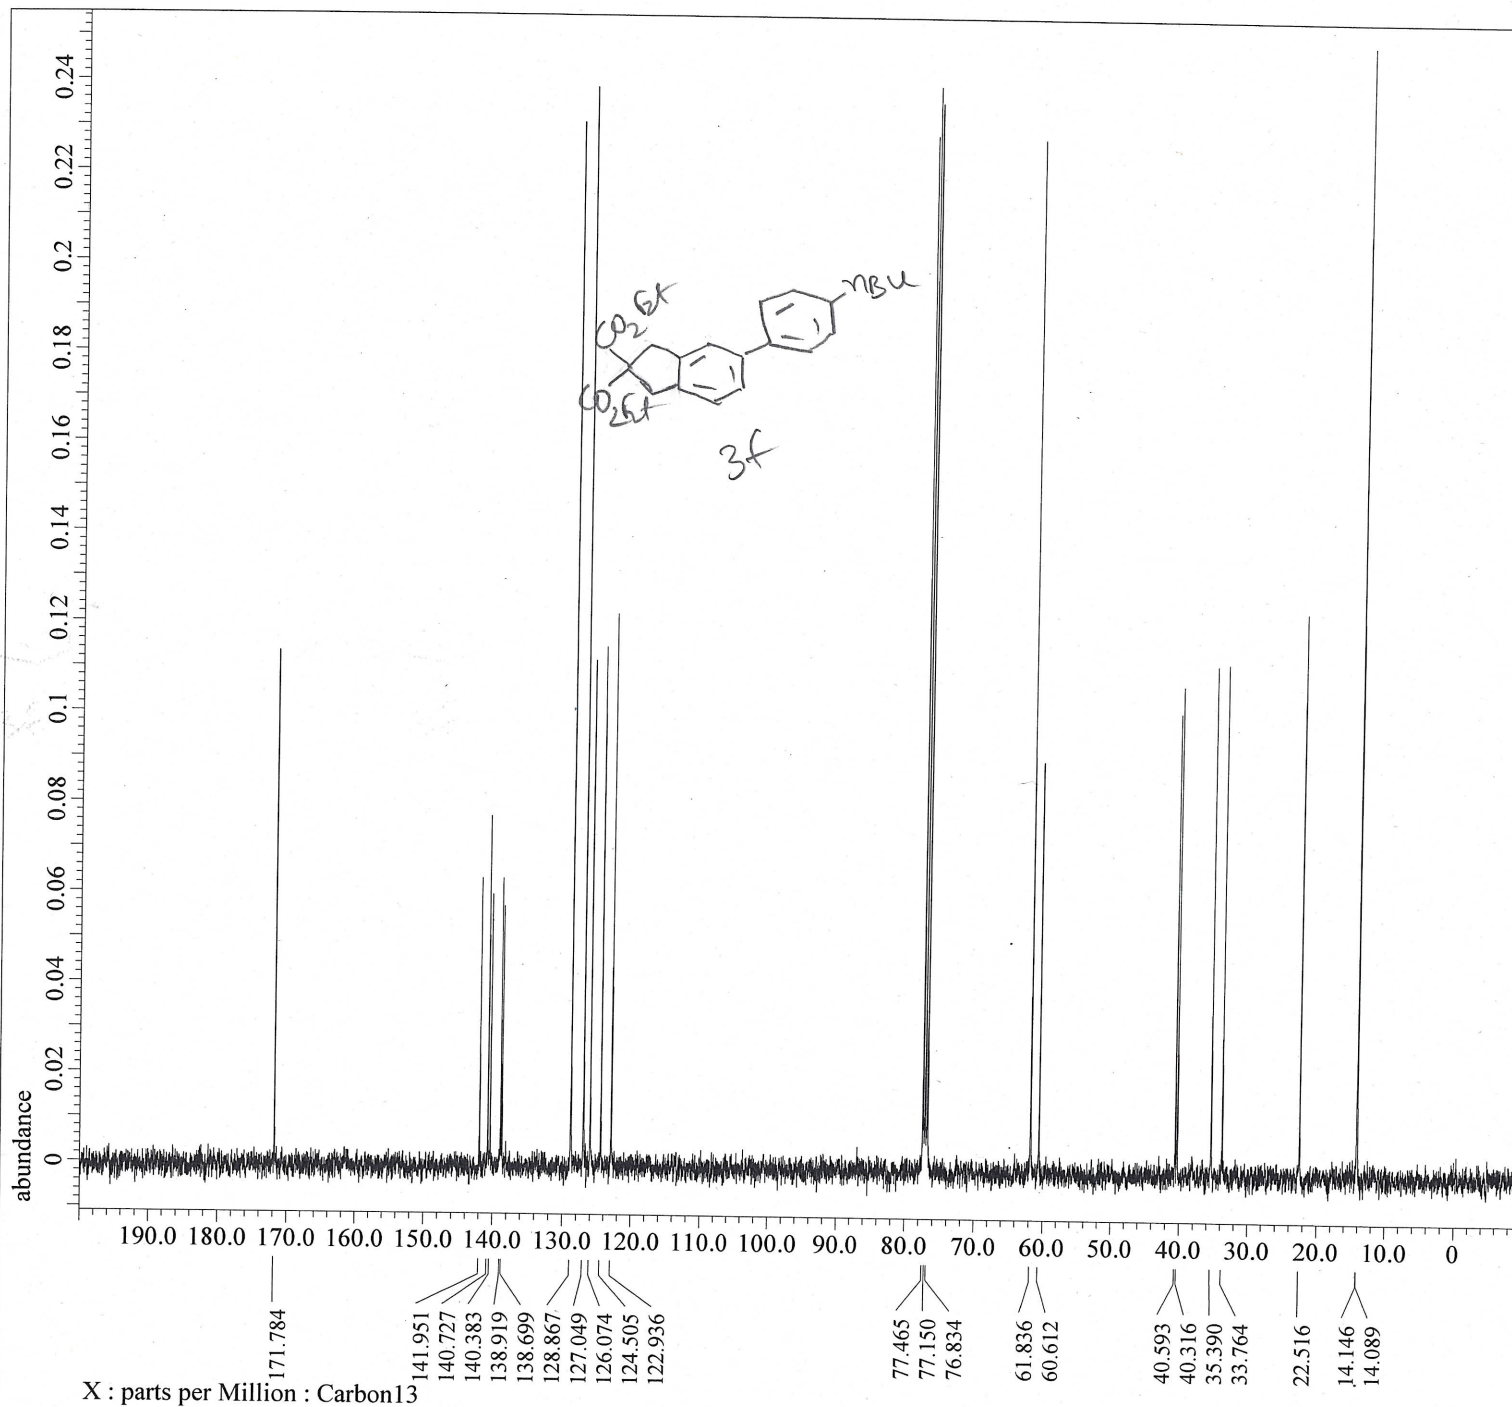

---- PROCESSING PARAMETERS ----  
dc balance( 0, FALSE )  
sexp( 2.0[Hz], 0.0[s] )  
trapezoid( 0[%], 0[%], 80[%], 100[%] )  
zerofill( 1 )  
fft( 1, TRUE, TRUE )  
machinephase  
ppm

Derived from: Jana225\_Carbon-1-1.jdf

Filename = Jana225\_Carbon-1-2.jdf  
Author = element  
Experiment = carbon.jxp  
Sample\_Id = Jana225  
Solvent = CHLOROFORM-D  
Actual\_Start\_Time = 7-JUN-2024 13:55:14  
Revision\_Time = 24-JUN-2024 18:28:02  
Comment = single pulse decoupled ga  
Data\_Format = 1D COMPLEX  
Dim\_Size = 26214  
X\_Domain = Carbon  
Dim\_Title = Carbon13  
Dim\_Units = [ppm]  
Dimensions = X  
Spectrometer = DELTA2\_NMR  
Field\_Strength = 9.4073814[T] (400[MHz])  
X\_Acq\_Duration = 1.03809024[s]  
X\_Domain = 13C  
X\_Freq = 100.71389092[MHz]  
X\_Offset = 100[ppm]  
X\_Points = 32768  
X\_Prescans = 4  
X\_Resolution = 0.96330739[Hz]  
X\_Sweep = 31.56565657[kHz]  
X\_Sweep\_Clipped = 25.25252525[kHz]  
Irr\_Domain = Proton  
Irr\_Freq = 400.53219825[MHz]  
Irr\_Offset = 5[ppm]  
Clipped = FALSE  
Scans = 200  
Total\_Scans = 200  
Relaxation\_Delay = 2[s]  
Recvr\_Gain = 50  
Temp\_Get = 20.9[dC]  
X\_90\_Width = 12.68[us]  
X\_Acq\_Time = 1.03809024[s]  
X\_Angle = 30[deg]  
X\_Atn = 4[dB]  
X\_Pulse = 4.22666667[us]  
Irr\_Atn\_Dec = 26.45[dB]  
Irr\_Atn\_Noe = 26.45[dB]  
Irr\_Noise = WALTZ  
Irr\_Pwidth = 0.115[ms]  
Decoupling = TRUE  
Initial\_Wait = 1[s]  
Noe = TRUE  
Noe\_Time = 2[s]  
Repetition\_Time = 3.03809024[s]

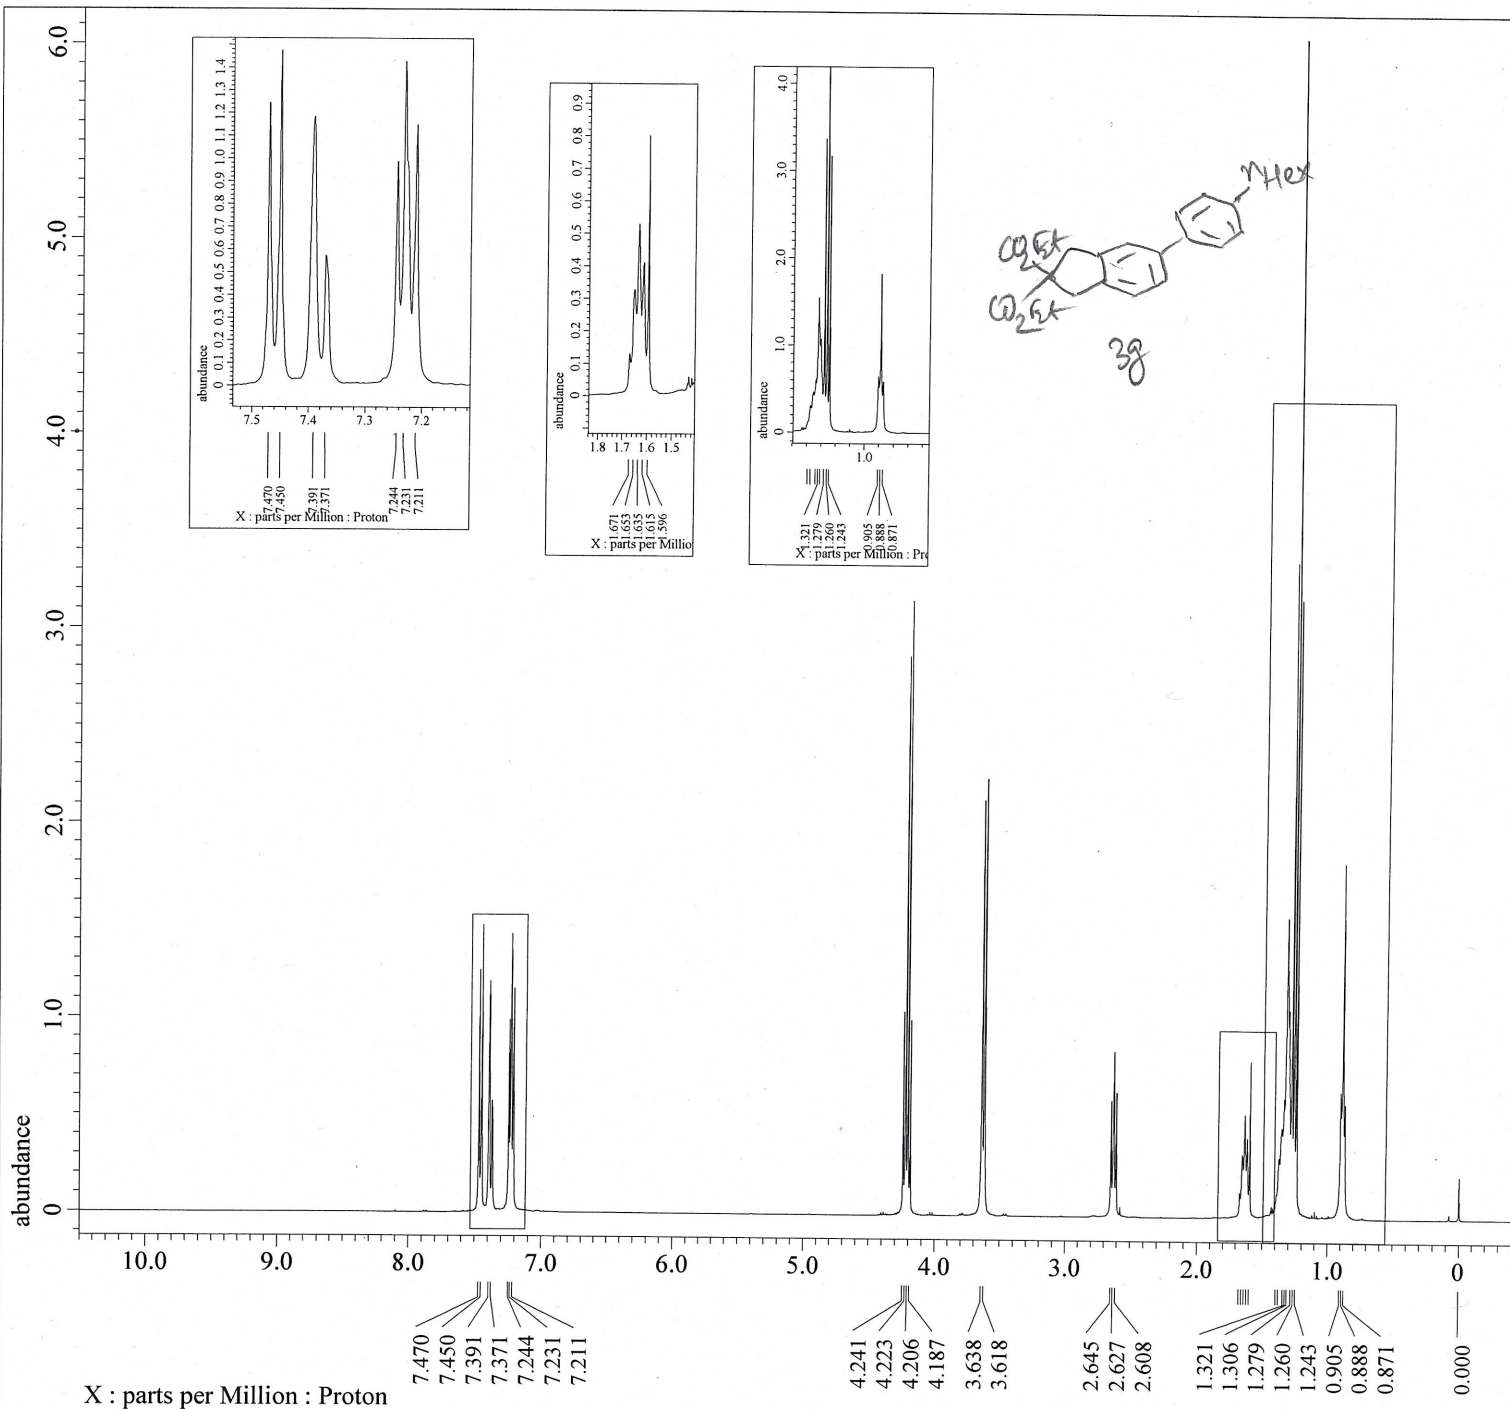

---- PROCESSING PARAMETERS ----  
 dc\_balance( 0, FALSE )  
 sexp( 0.2[Hz], 0.0[s] )  
 trapezoid( 0[%], 0[%], 80[%], 100[%] )  
 zerofill( 1 )  
 fft( 1, TRUE, TRUE )  
 machinephase  
 ppm

Derived from: Jana219\_Proton-1-1.jdf

Filename = Jana219\_Proton-1-2.jdf  
 Author = element  
 Experiment = proton.jxp  
 Sample\_Id = Jana219  
 Solvent = CHLOROFORM-D  
 Actual\_Start\_Time = 1-JUN-2024 15:10:49  
 Revision\_Time = 10-FEB-2025 20:56:57

Comment = single pulse  
 Data Format = 1D COMPLEX  
 Dim\_Size = 13107  
 X\_Domain = Proton  
 Dim\_Title = Proton  
 Dim\_Units = [ppm]  
 Dimensions = X  
 Spectrometer = DELTA2\_NMR

Field\_Strength = 9.4073814[T] (400[MHz])  
 X\_Acq\_Duration = 2.18103808[s]  
 X\_Domain = 1H  
 X\_Freq = 400.53219825[MHz]  
 X\_Offset = 5[ppm]  
 X\_Points = 16384  
 X\_Prescans = 1  
 X\_Resolution = 0.45849727[Hz]  
 X\_Sweep = 7.51201923[kHz]  
 X\_Sweep\_Clippped = 6.00961538[kHz]  
 Irr\_Domain = Proton  
 Irr\_Freq = 400.53219825[MHz]  
 Irr\_Offset = 5[ppm]  
 Tri\_Domain = Proton  
 Tri\_Freq = 400.53219825[MHz]  
 Tri\_Offset = 5[ppm]  
 Clipped = FALSE  
 Scans = 8  
 Total\_Scans = 8

Relaxation\_Delay = 5[s]  
 Recvr Gain = 26  
 Temp\_Get = 20.8[dC]  
 X\_90\_Width = 6.7[us]  
 X\_Acq Time = 2.18103808[s]  
 X\_Angle = 45[deg]  
 X\_Atn = 0.8[dB]  
 X\_Pulse = 3.35[us]  
 Irr\_Mode = Off  
 Tri\_Mode = Off  
 Dante Presat = FALSE  
 Initial Wait = 1[s]  
 Repetition\_Time = 7.18103808[s]

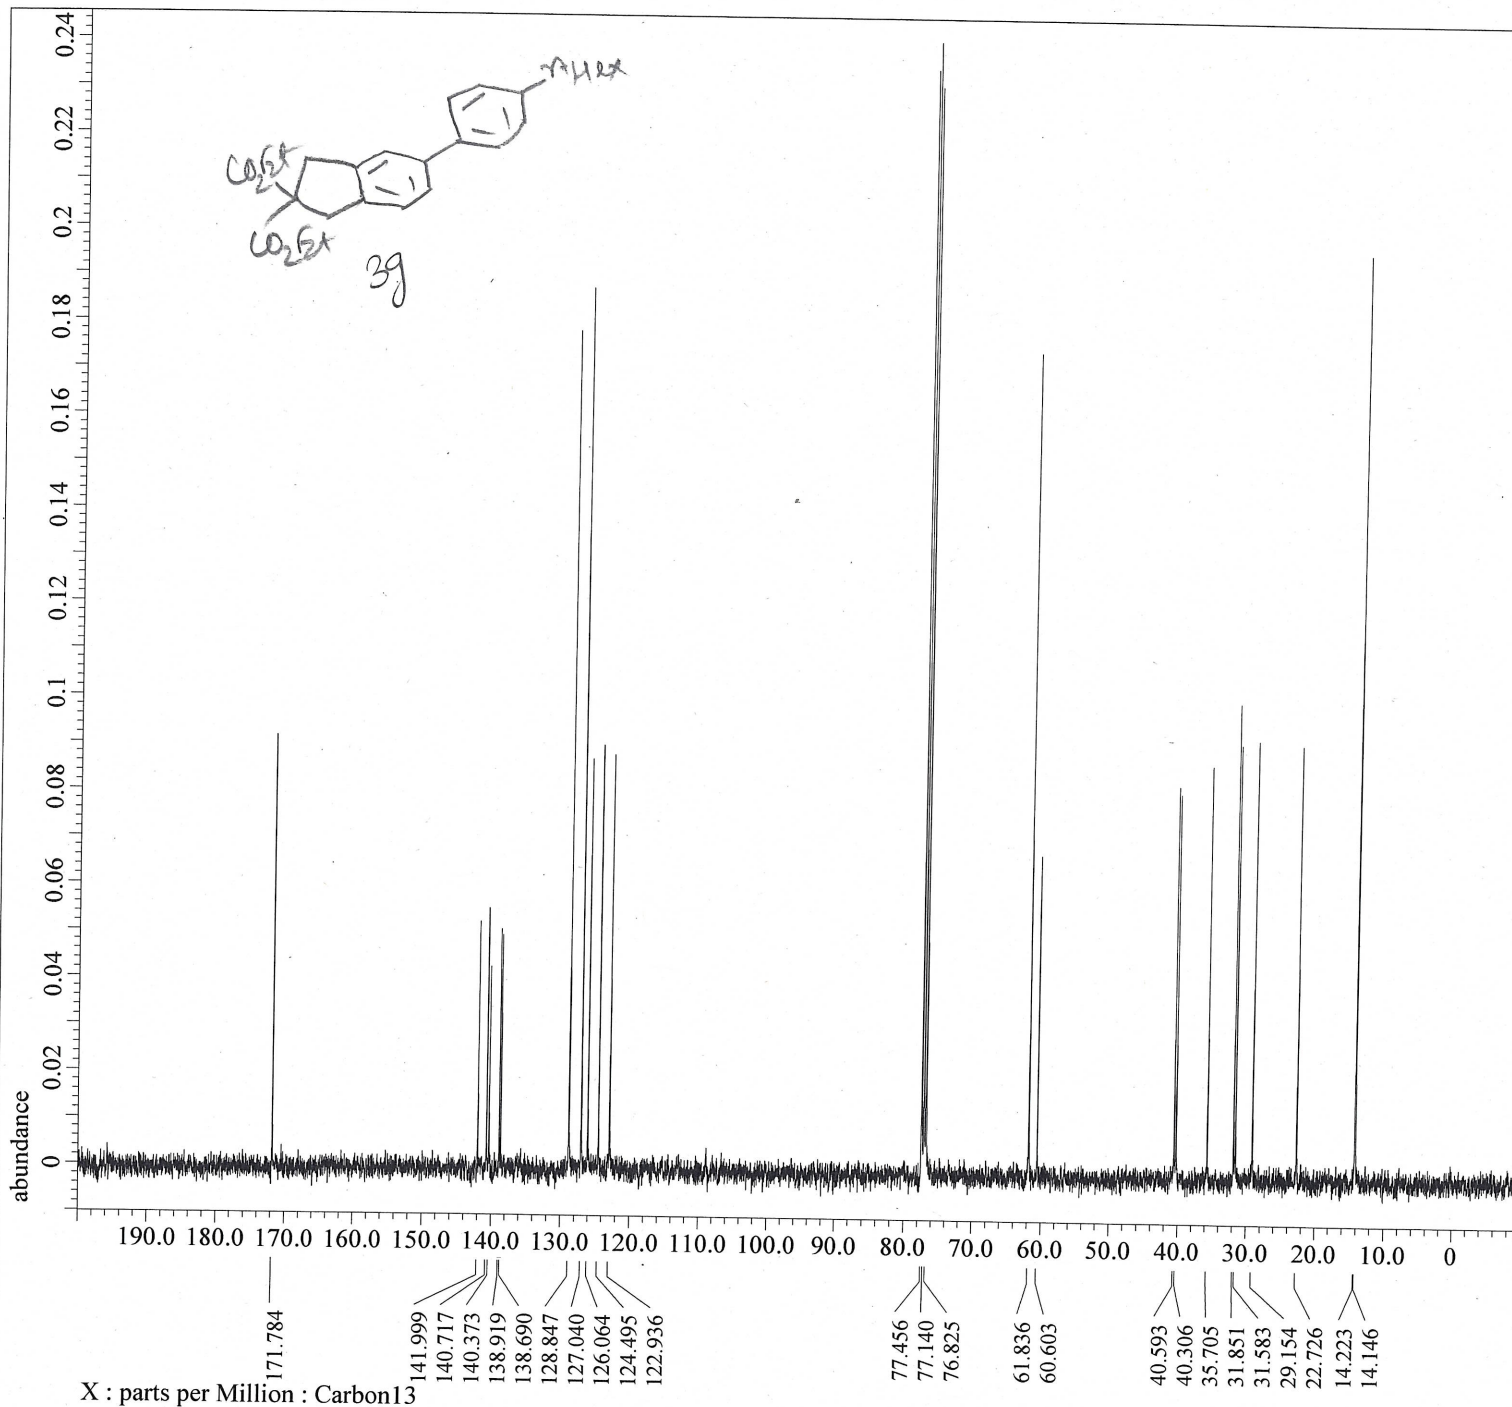

---- PROCESSING PARAMETERS ----  
 dc\_balance( 0, FALSE )  
 sexp( 2.0[Hz], 0.0[s] )  
 trapezoid( 0[%], 0[%], 80[%], 100[%] )  
 zerofill( 1 )  
 fft( 1, TRUE, TRUE )  
 machinephase  
 ppm

Derived from: Jana219\_Carbon-1-1.jdf

Filename = Jana219\_Carbon-1-2.jdf  
 Author = element  
 Experiment = carbon.jxp  
 Sample\_Id = Jana219  
 Solvent = CHLOROFORM-D  
 Actual\_Start\_Time = 1-JUN-2024 15:12:09  
 Revision\_Time = 15-JUN-2024 16:08:32

Comment = single pulse decoupled ga  
 Data Format = 1D COMPLEX  
 Dim\_Size = 26214  
 X\_Domain = Carbon  
 Dim\_Title = Carbon13  
 Dim\_Units = [ppm]  
 Dimensions = X  
 Spectrometer = DELTA2\_NMR

Field\_Strength = 9.4073814[T] (400[MHz])  
 X\_Acq\_Duration = 1.03809024[s]  
 X\_Domain = 13C  
 X\_Freq = 100.71389092[MHz]  
 X\_Offset = 100[ppm]  
 X\_Points = 32768  
 X\_Prescans = 4  
 X\_Resolution = 0.96330739[Hz]  
 X\_Sweep = 31.56565657[kHz]  
 X\_Sweep\_Clipped = 25.25252525[kHz]  
 Irr\_Domain = Proton  
 Irr\_Freq = 400.53219825[MHz]  
 Irr\_Offset = 5[ppm]  
 Clipped = FALSE  
 Scans = 250  
 Total\_Scans = 250

Relaxation\_Delay = 2[s]  
 Recvr\_Gain = 50  
 Temp\_Get = 21[dc]  
 X\_90\_Width = 12.68[us]  
 X\_Acq\_Time = 1.03809024[s]  
 X\_Angle = 30[deg]  
 X\_Atn = 4[dB]  
 X\_Pulse = 4.22666667[us]  
 Irr\_Atn\_Dec = 26.45[dB]  
 Irr\_Atn\_Noe = 26.45[dB]  
 Irr\_Noise = WALTZ  
 Irr\_Pwidth = 0.115[ms]  
 Decoupling = TRUE  
 Initial\_Wait = 1[s]  
 Noe = TRUE  
 Noe\_Time = 2[s]  
 Repetition\_Time = 3.03809024[s]



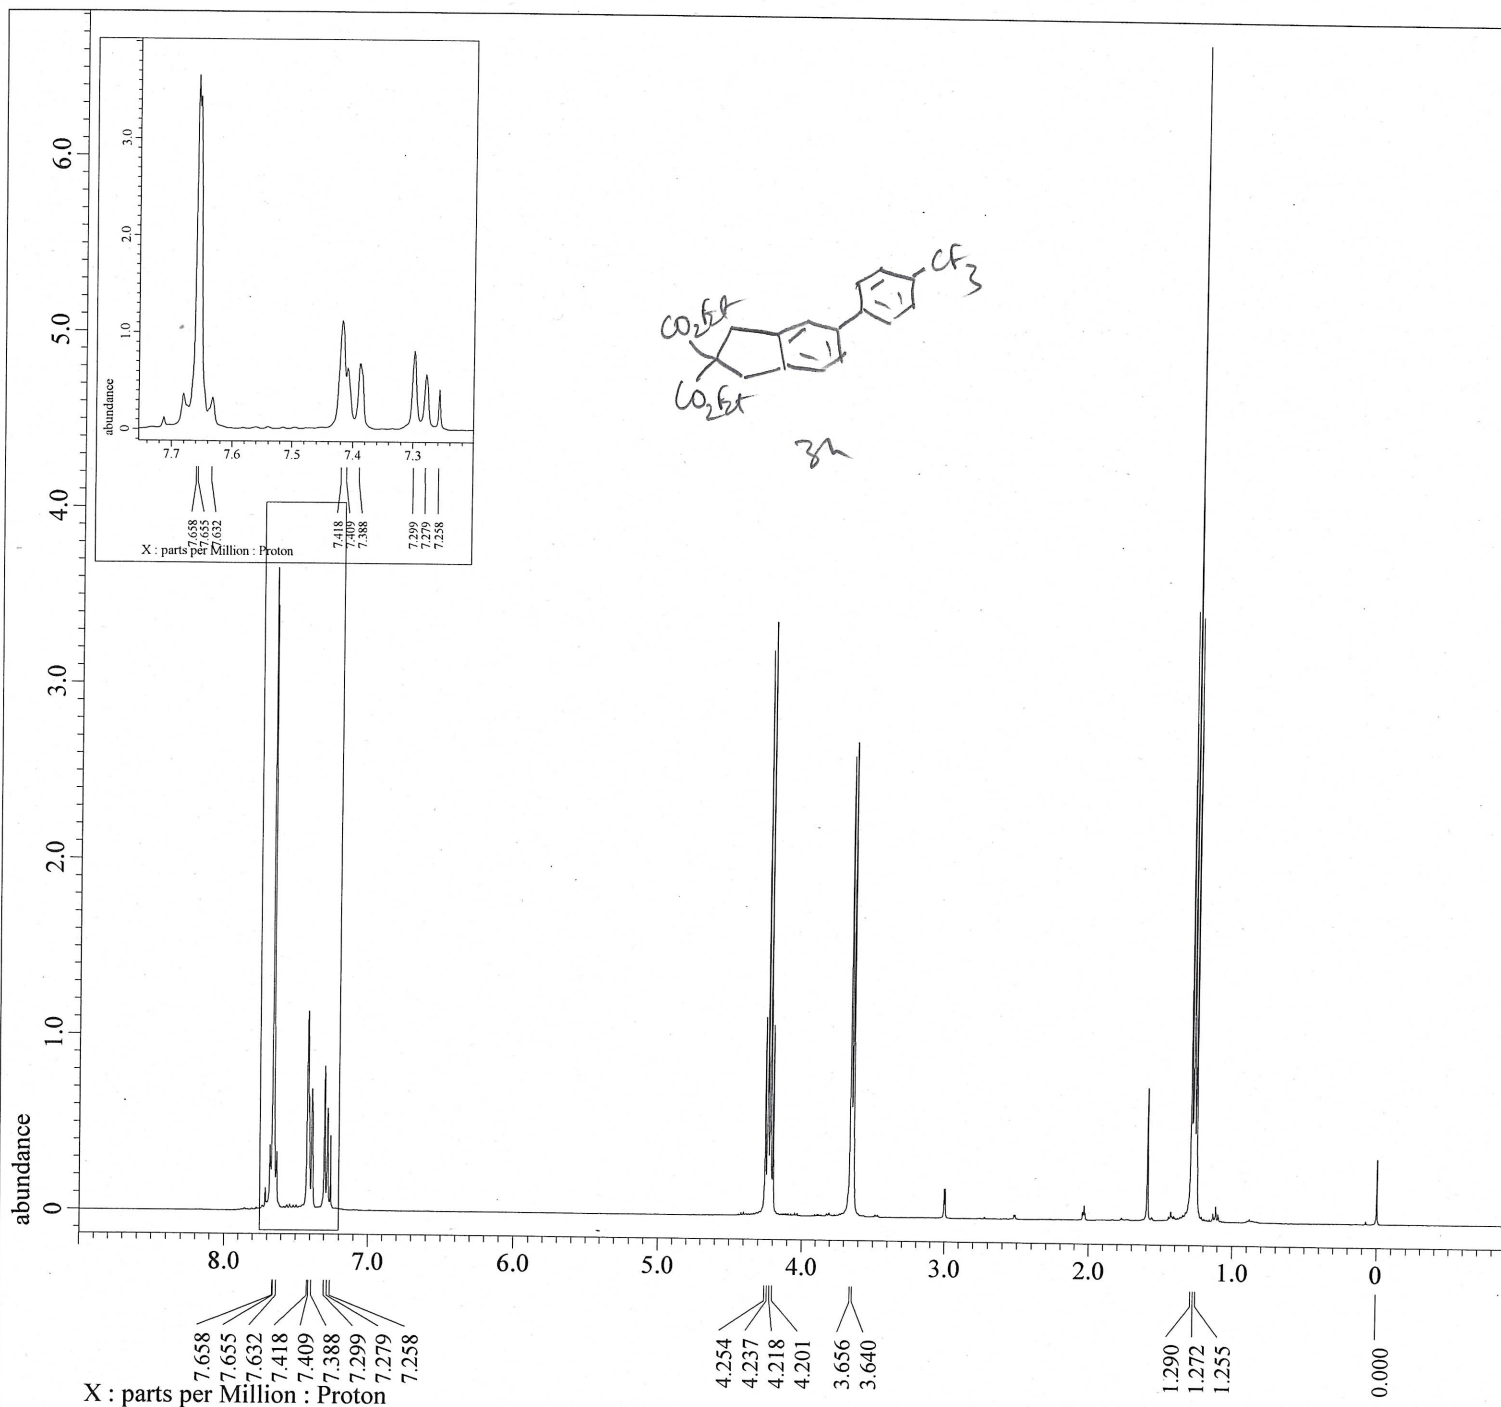

```

---- PROCESSING PARAMETERS ----
dc balance( 0, FALSE )
sexf( 0.2[Hz], 0.0[s] )
trapezoid( 0[%], 0[%], 80[%], 100[%] )
zerofill( 1 )
fft( 1, TRUE, TRUE )
machinephase
ppm

```

Derived from: Jana215pp\_Proton-1-1.jdf

```

Filename      = Jana215pp_Proton-1-2.jdf
Author       = element
Experiment    = proton.jxp
Sample_Id    = Jana215pp
Solvent      = CHLOROFORM-D
Actual_Start_Time = 31-MAY-2024 20:59:49
Revision_Time  = 15-JUN-2024 15:20:59

```

```

Comment       = single_pulse
Data Format    = 1D COMPLEX
Dim_Size      = 13107
X_Domain      = Proton
Dim_Title     = Proton
Dim_Units     = [ppm]
Dimensions    = X
Spectrometer  = DELTA2_NMR

```

```

Field Strength = 9.4073814[T] (400[MHz])
X_Acq_Duration = 2.18103808[s]
X_Domain       = 1H
X_Freq         = 400.53219825[MHz]
X_Offset       = 5[ppm]
X_Points       = 16384
X_Prescans     = 1
X_Resolution   = 0.45849727[Hz]
X_Sweep        = 7.51201923[kHz]
X_Sweep_Clipped = 6.00961538[kHz]
Irr_Domain     = Proton
Irr_Freq       = 400.53219825[MHz]
Irr_Offset     = 5[ppm]
Tri_Domain     = Proton
Tri_Freq       = 400.53219825[MHz]
Tri_Offset     = 5[ppm]
Clipped        = FALSE
Scans          = 8
Total_Scans    = 8

```

```

Relaxation_Delay = 5[s]
Recvr_Gain       = 30
Temp_Get        = 20.5[dc]
X_90_Width      = 6.7[us]
X_Acq_Time       = 2.18103808[s]
X_Angle         = 45[deg]
X_Atn           = 0.8[dB]
X_Pulse         = 3.35[us]
Irr_Mode        = Off
Tri_Mode        = Off
Dante_Presat    = FALSE
Initial_Wait     = 1[s]
Repetition_Time  = 7.18103808[s]

```



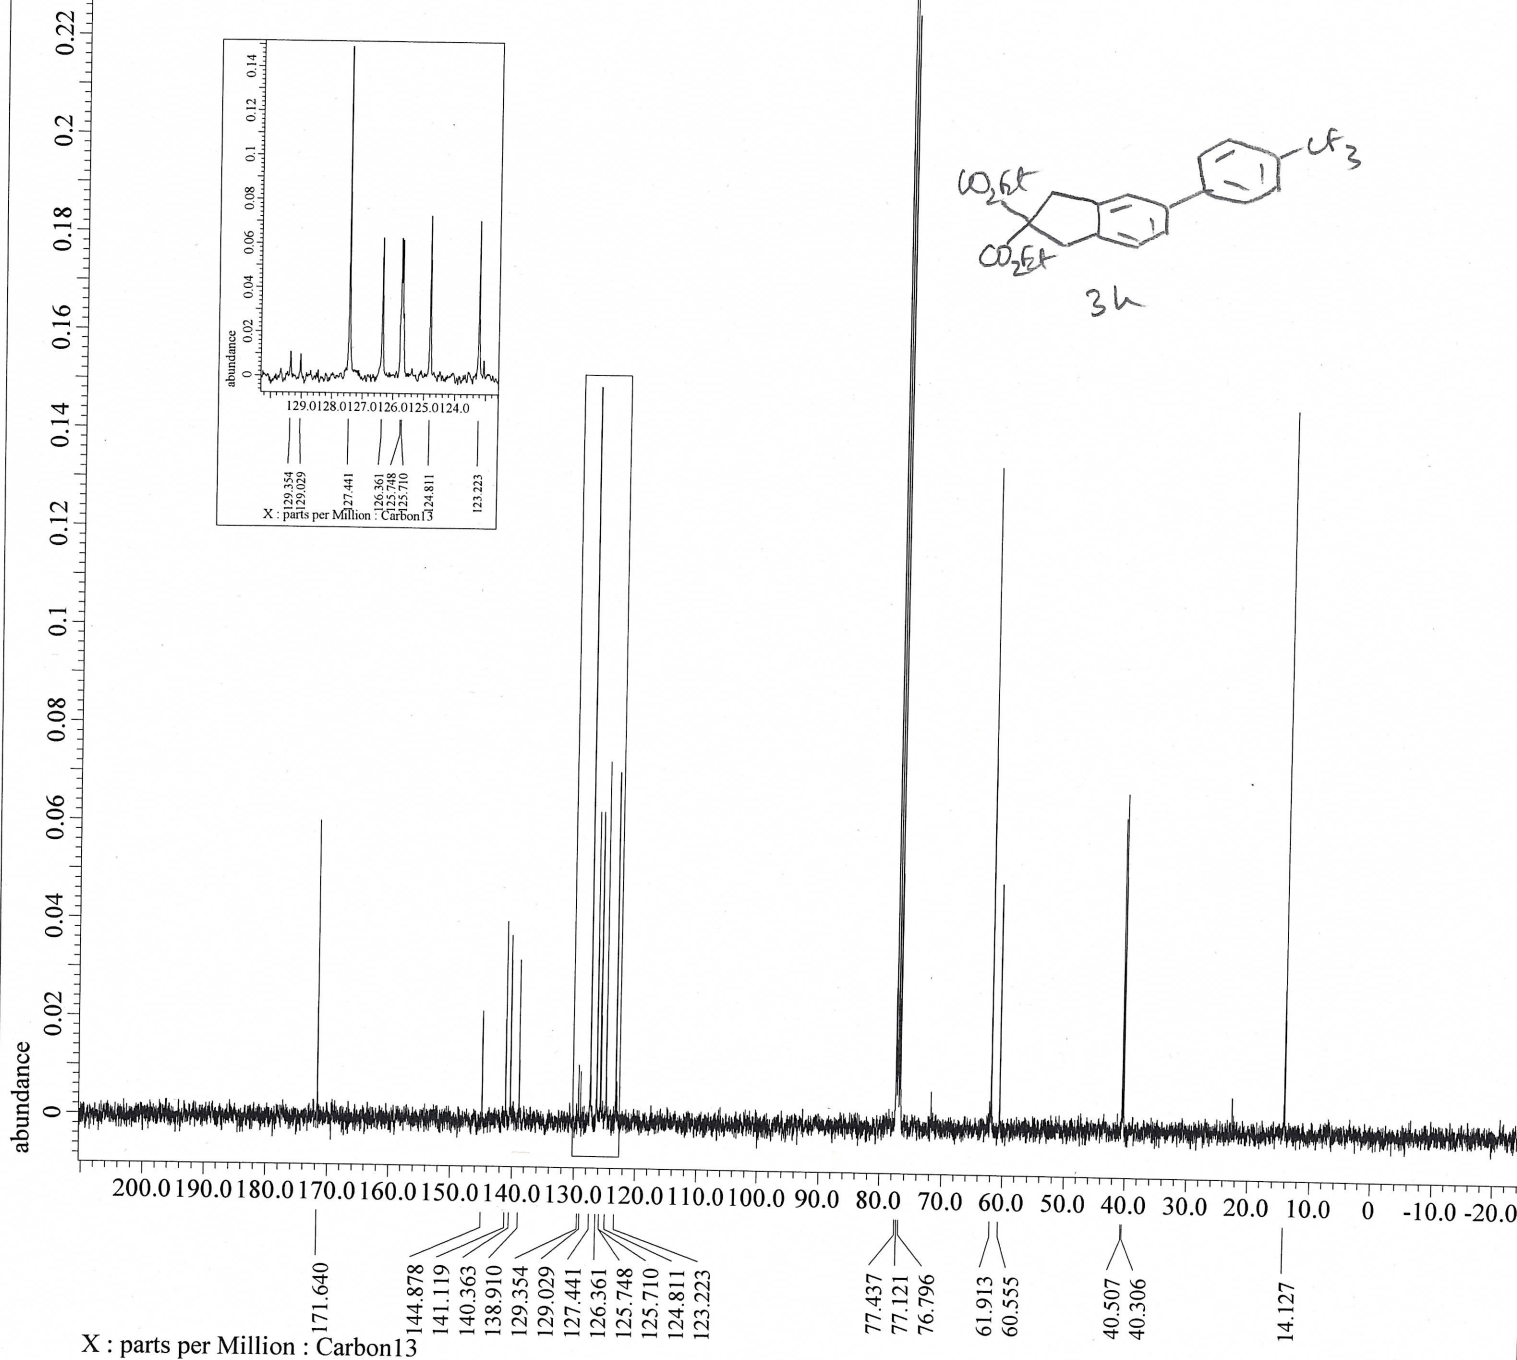

----- PROCESSING PARAMETERS -----  
 dc\_balance( 0, FALSE )  
 sexp( 2.0[Hz], 0.0[s] )  
 trapezoid( 0[%], 0[%], 80[%], 100[%] )  
 zerofill( 1 )  
 fft( 1, TRUE, TRUE )  
 machinephase  
 ppm

Derived from: Jana215pp\_Carbon-1-1.jdf

Filename = Jana215pp\_Carbon-1-2.jdf  
 Author = element  
 Experiment = carbon.jxp  
 Sample\_Id = Jana215pp  
 Solvent = CHLOROFORM-D  
 Actual\_Start\_Time = 31-MAY-2024 21:01:09  
 Revision\_Time = 27-FEB-2025 18:27:54

Comment = single pulse decoupled ga  
 Data Format = 1D COMPLEX  
 Dim\_Size = 26214  
 X\_Domain = Carbon  
 Dim\_Title = Carbon13  
 Dim\_Units = [ppm]  
 Dimensions = X  
 Spectrometer = DELTA2\_NMR

Field\_Strength = 9.4073814[T] (400[MHz])  
 X\_Acq\_Duration = 1.03809024[s]  
 X\_Domain = 13C  
 X\_Freq = 100.71389092[MHz]  
 X\_Offset = 100[ppm]  
 X\_Points = 32768  
 X\_Prescans = 4  
 X\_Resolution = 0.96330739[Hz]  
 X\_Sweep = 31.56565657[kHz]  
 X\_Sweep\_Clipped = 25.25252525[kHz]  
 Irr\_Domain = Proton  
 Irr\_Freq = 400.53219825[MHz]  
 Irr\_Offset = 5[ppm]  
 Clipped = FALSE  
 Scans = 300  
 Total\_Scans = 300

Relaxation\_Delay = 2[s]  
 Recvr\_Gain = 50  
 Temp\_Get = 20.3[dC]  
 X\_90\_Width = 12.68[us]  
 X\_Acq\_Time = 1.03809024[s]  
 X\_Angle = 30[deg]  
 X\_Atn = 4[dB]  
 X\_Pulse = 4.22666667[us]  
 Irr\_Atn\_Dec = 26.45[dB]  
 Irr\_Atn\_Noe = 26.45[dB]  
 Irr\_Noise = WALTZ  
 Irr\_Pwidth = 0.115[ms]  
 Decoupling = TRUE  
 Initial\_Wait = 1[s]  
 Noe = TRUE  
 Noe\_Time = 2[s]  
 Repetition\_Time = 3.03809024[s]

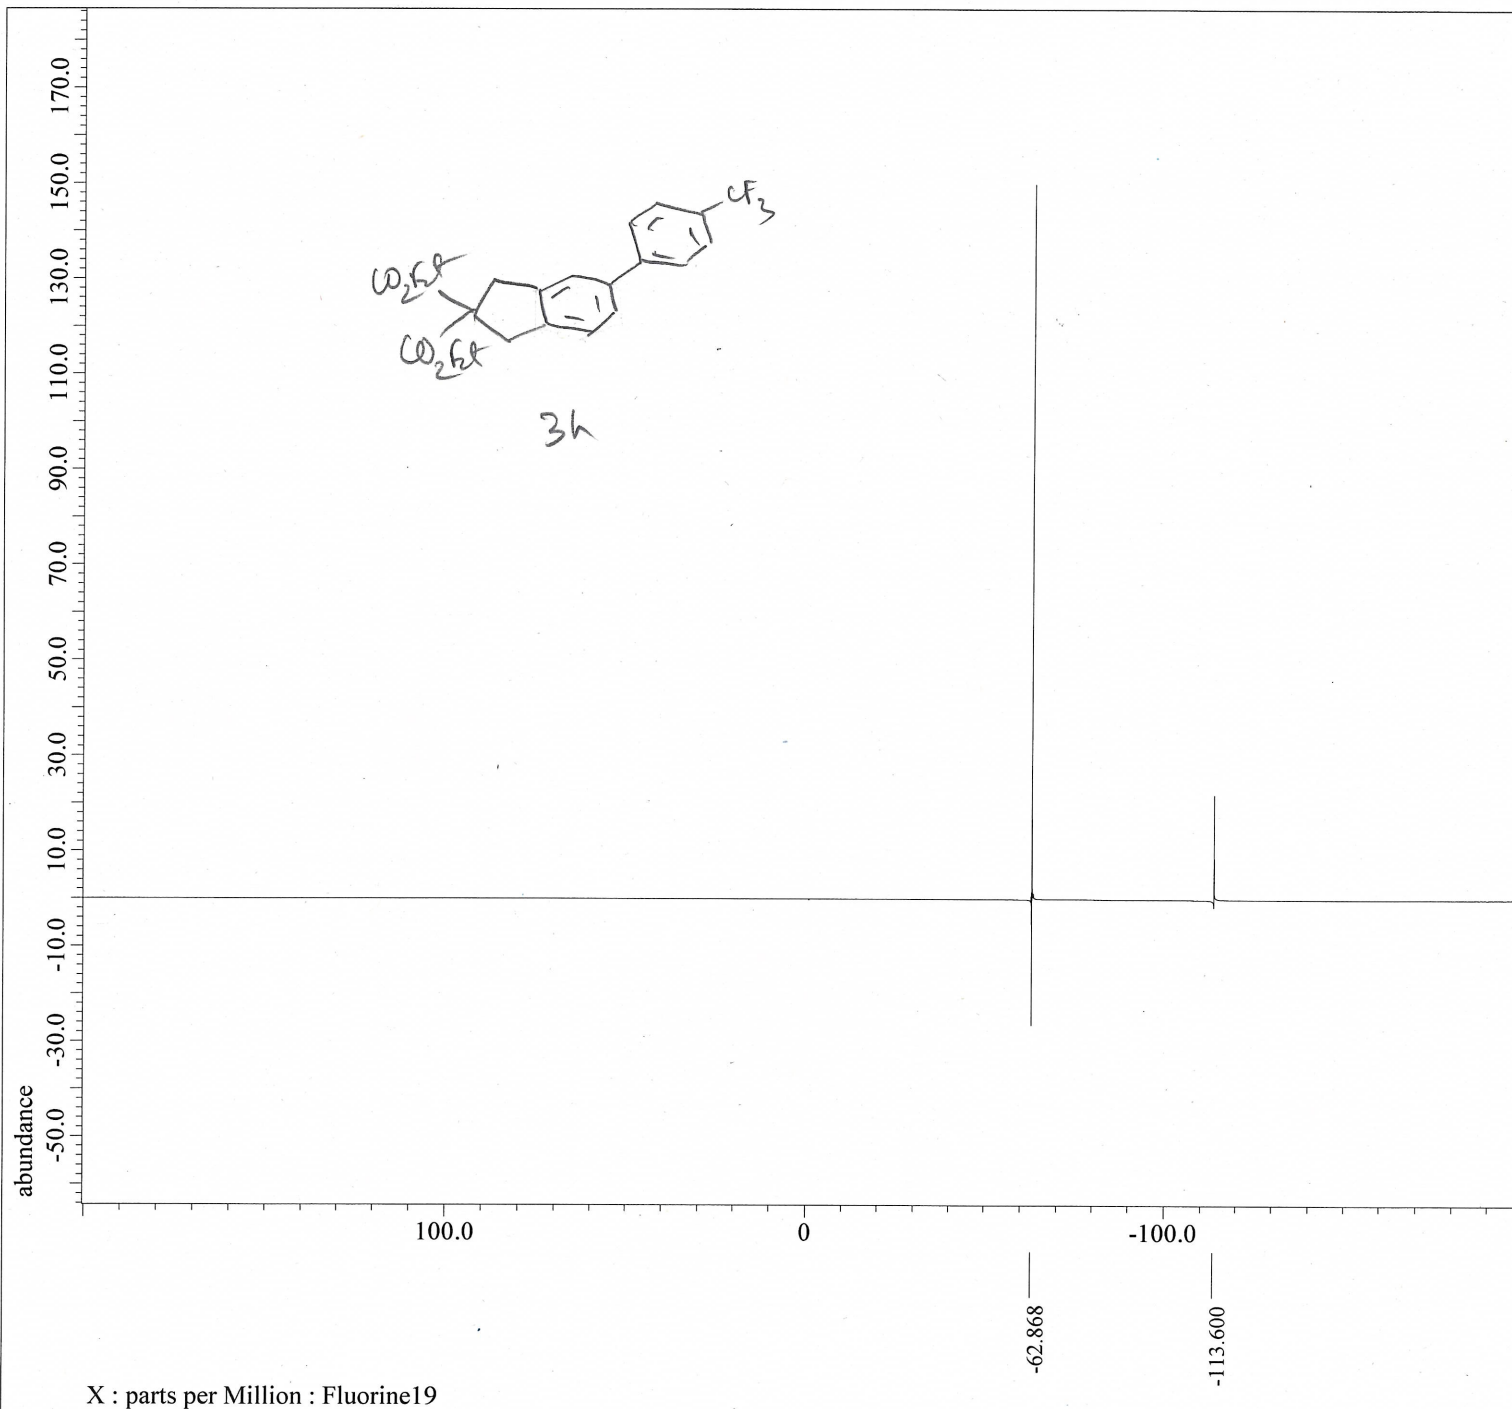

----- PROCESSING PARAMETERS -----

```

dc_balance( 0, FALSE )
sexp( 0.2[Hz], 0.0[s] )
trapezoid( 0[%], 0[%], 80[%], 100[%] )
zerofill( 1 )
fft( 1, TRUE, TRUE )
machinephase
ppm

```

Derived from: Jana215f\_single\_pulse-1-1.jdf

|                   |   |                           |
|-------------------|---|---------------------------|
| Filename          | = | Jana215f_single_pulse-1-2 |
| Author            | = | element                   |
| Experiment        | = | single_pulse.jxp          |
| Sample_Id         | = | Jana215f                  |
| Solvent           | = | CHLOROFORM-D              |
| Actual_Start_Time | = | 7-FEB-2025 19:02:03       |
| Revision_Time     | = | 7-FEB-2025 18:35:04       |
| Comment           | = | single_pulse              |
| Data Format       | = | 1D COMPLEX                |
| Dim_Size          | = | 13107                     |
| X_Domain          | = | Fluori                    |
| Dim_Title         | = | Fluorine19                |
| Dim_Units         | = | [ppm]                     |
| Dimensions        | = | X                         |
| Spectrometer      | = | DELTA2_NMR                |
| Field_Strength    | = | 9.4073814[T] (400[MHz])   |
| X_Acq_Duration    | = | 86.50752[ms]              |
| X_Domain          | = | 19F                       |
| X_Freq            | = | 376.87675879[MHz]         |
| X_Offset          | = | 0[ppm]                    |
| X_Points          | = | 16384                     |
| X_Prescans        | = | 1                         |
| X_Resolution      | = | 11.55968868[Hz]           |
| X_Sweep           | = | 189.39393939[kHz]         |
| X_Sweep_Clippped  | = | 151.51515152[kHz]         |
| Irr_Domain        | = | Fluorine19                |
| Irr_Freq          | = | 376.87675879[MHz]         |
| Irr_Offset        | = | 5[ppm]                    |
| Tri_Domain        | = | Fluorine19                |
| Tri_Freq          | = | 376.87675879[MHz]         |
| Tri_Offset        | = | 5[ppm]                    |
| Clipped           | = | FALSE                     |
| Scans             | = | 8                         |
| Total_Scans       | = | 8                         |
| Relaxation_Delay  | = | 5[s]                      |
| Recvr_Gain        | = | 42                        |
| Temp_Get          | = | 18[dC]                    |
| X_90_Width        | = | 7.59[us]                  |
| X_Acq_Time        | = | 86.50752[ms]              |
| X_Angle           | = | 45[deg]                   |
| X_Atn             | = | 3[dB]                     |
| X_Pulse           | = | 3.795[us]                 |
| Irr_Mode          | = | Off                       |
| Tri_Mode          | = | Off                       |
| Dante_Presat      | = | FALSE                     |
| Initial_Wait      | = | 1[s]                      |
| Repetition_Time   | = | 5.08650752[s]             |

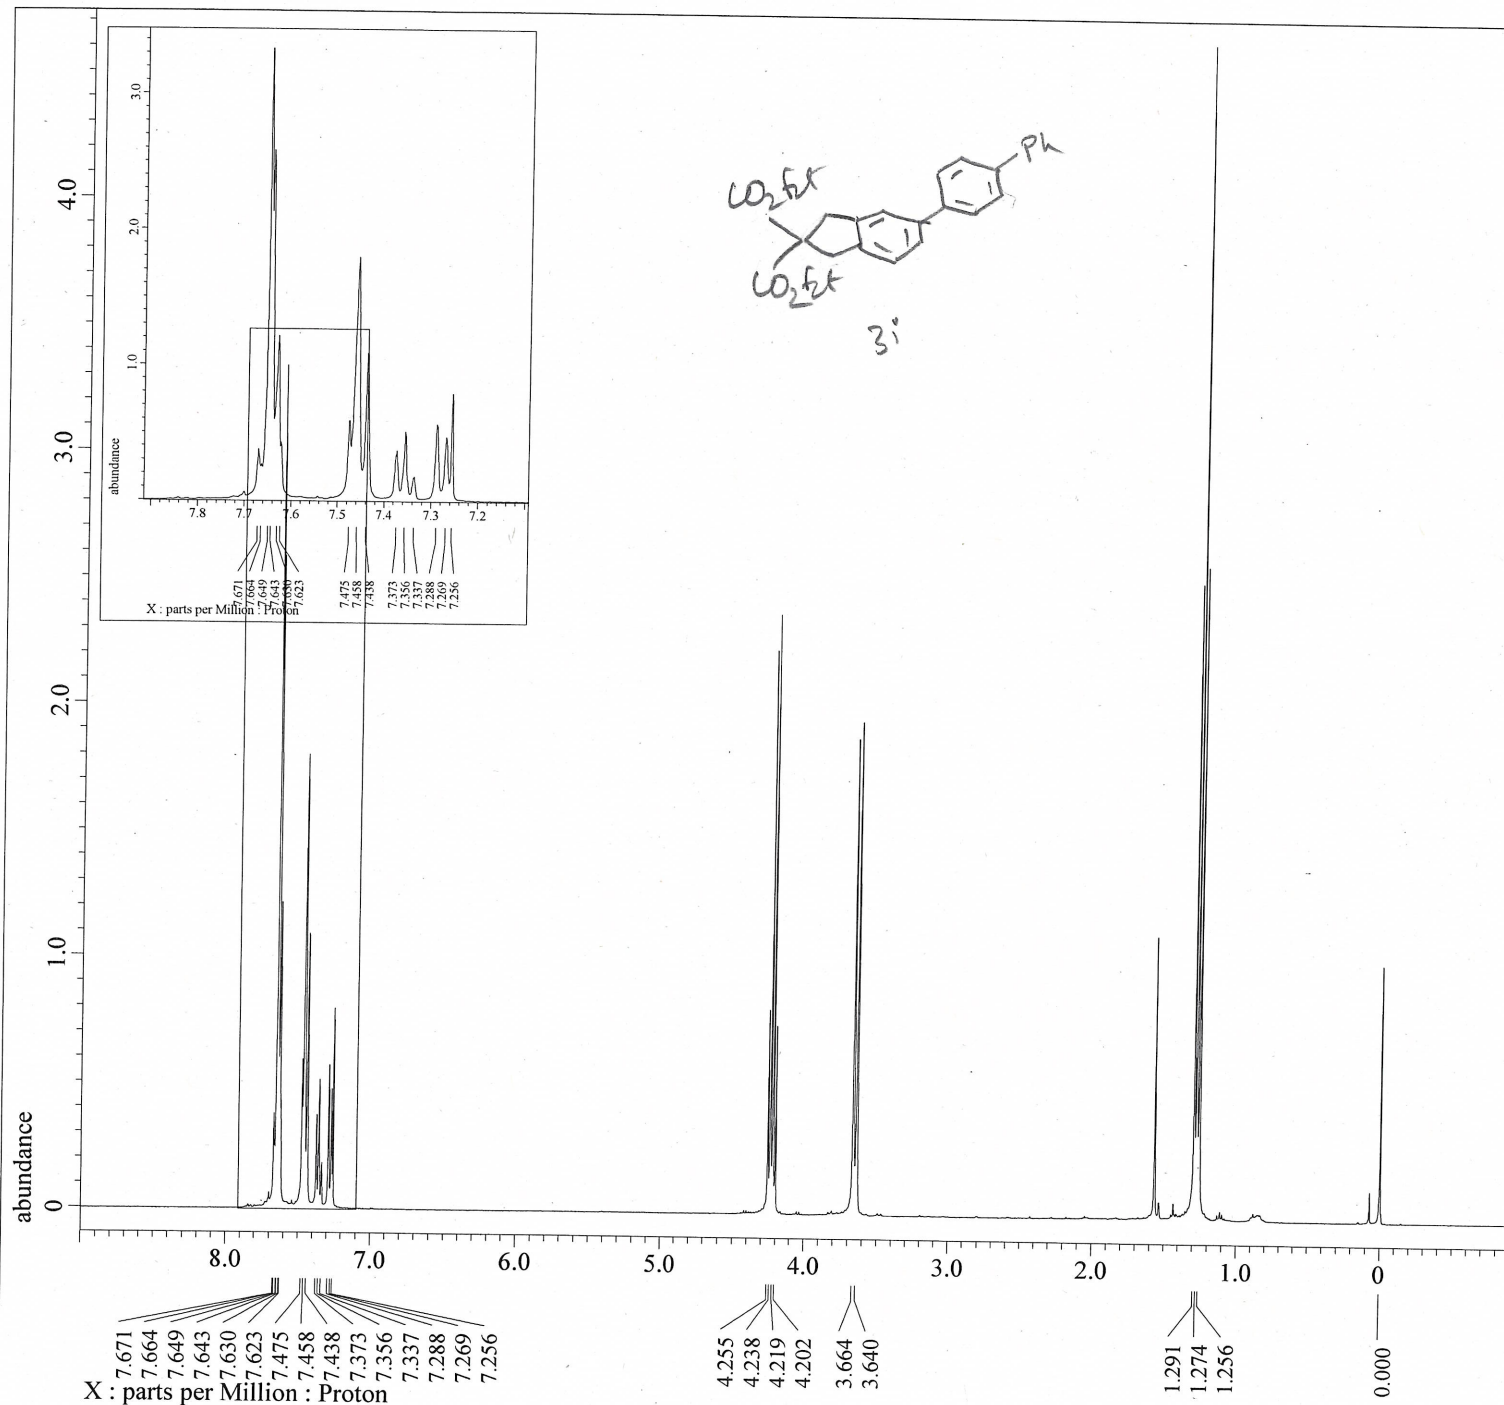

```

---- PROCESSING PARAMETERS ----
dc balance( 0, FALSE )
sexp( 0.2[Hz], 0.0[s] )
trapezoid( 0[%], 0[%], 80[%], 100[%] )
zerofill( 1 )
fft( 1, TRUE, TRUE )
machinephase
ppm

```

Derived from: Jana216pp\_Proton-1-1.jdf

```

Filename      = Jana216pp_Proton-1-2.jdf
Author       = element
Experiment    = proton.jxp
Sample_Id    = Jana216pp
Solvent      = CHLOROFORM-D
Actual_Start_Time = 31-MAY-2024 14:46:18
Revision_Time  = 15-JUN-2024 13:34:48

```

```

Comment       = single_pulse
Data Format    = 1D COMPLEX
Dim Size      = 13107
X_Domain      = Proton
Dim Title     = Proton
Dim Units     = [ppm]
Dimensions    = X
Spectrometer  = DELTA2_NMR

```

```

Field Strength = 9.4073814[T] (400[MHz])
X_Acq_Duration = 2.18103808[s]
X_Domain       = 1H
X_Freq         = 400.53219825[MHz]
X_Offset       = 5[ppm]
X_Points       = 16384
X_Prescans     = 1
X_Resolution   = 0.45849727[Hz]
X_Sweep        = 7.51201923[kHz]
X_Sweep_Clippped = 6.00961538[kHz]
Irr_Domain     = Proton
Irr_Freq       = 400.53219825[MHz]
Irr_Offset     = 5[ppm]
Tri_Domain     = Proton
Tri_Freq       = 400.53219825[MHz]
Tri_Offset     = 5[ppm]
Clipped        = FALSE
Scans          = 8
Total_Scans    = 8

```

```

Relaxation_Delay = 5[s]
Recvr_Gain       = 36
Temp_Get        = 19.9[dc]
X_90_Width      = 6.7[us]
X_Acq_Time      = 2.18103808[s]
X_Angle         = 45[deg]
X_Atn           = 0.8[dB]
X_Pulse         = 3.35[us]
Irr_Mode        = Off
Tri_Mode        = Off
Dante_Presat    = FALSE
Initial_Wait    = 1[s]
Repetition_Time = 7.18103808[s]

```



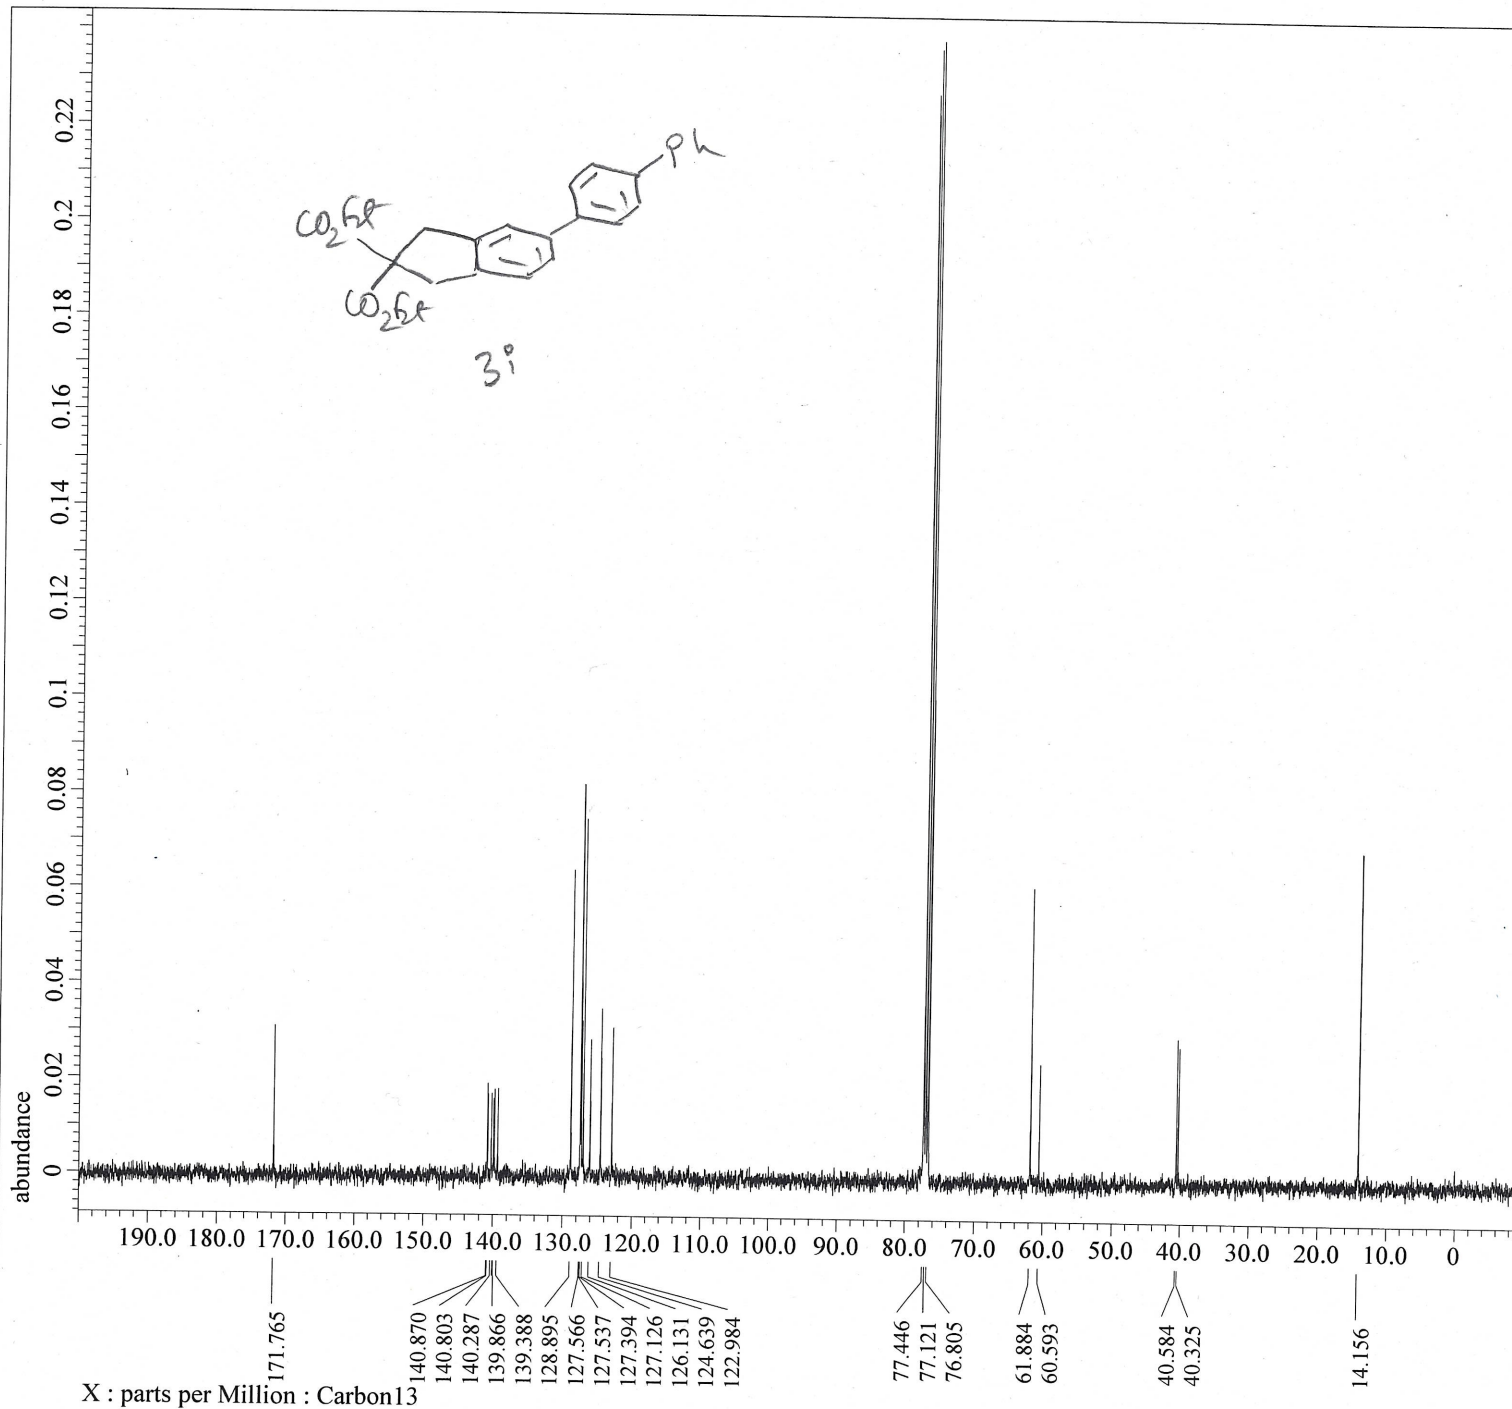

----- PROCESSING PARAMETERS -----  
 dc\_balance( 0, FALSE )  
 sexp( 2.0[Hz], 0.0[s] )  
 trapezoid( 0[%], 0[%], 80[%], 100[%] )  
 zerofill( 1 )  
 fft( 1, TRUE, TRUE )  
 machinephase  
 ppm

Derived from: Jana216\_Carbon-1-1.jdf

Filename = Jana216\_Carbon-1-2.jdf  
 Author = element  
 Experiment = carbon.jxp  
 Sample\_Id = Jana216  
 Solvent = CHLOROFORM-D  
 Actual\_Start\_Time = 30-JAN-2025 20:01:39  
 Revision\_Time = 30-JAN-2025 19:57:28

Comment = single pulse decoupled ga  
 Data Format = 1D COMPLEX  
 Dim\_Size = 26214  
 X\_Domain = Carbon  
 Dim\_Title = Carbon13  
 Dim\_Units = [ppm]  
 Dimensions = X  
 Spectrometer = DELTA2\_NMR

Field\_Strength = 9.4073814[T] (400[MHz])  
 X\_Acq\_Duration = 1.03809024[s]  
 X\_Domain = 13C  
 X\_Freq = 100.71389092[MHz]  
 X\_Offset = 100[ppm]  
 X\_Points = 32768  
 X\_Prescans = 4  
 X\_Resolution = 0.96330739[Hz]  
 X\_Sweep = 31.56565657[kHz]  
 X\_Sweep\_Clippped = 25.25252525[kHz]  
 Irr\_Domain = Proton  
 Irr\_Freq = 400.53219825[MHz]  
 Irr\_Offset = 5[ppm]  
 Clipped = FALSE  
 Scans = 500  
 Total\_Scans = 500

Relaxation\_Delay = 2[s]  
 Recvr\_Gain = 50  
 Temp\_Get = 18[dC]  
 X\_90\_Width = 12.68[us]  
 X\_Acq\_Time = 1.03809024[s]  
 X\_Angle = 30[deg]  
 X\_Atn = 4[dB]  
 X\_Pulse = 4.22666667[us]  
 Irr\_Atn\_Dec = 26.45[dB]  
 Irr\_Atn\_Noie = 26.45[dB]  
 Irr\_Noie = WALTZ  
 Irr\_Pwidth = 0.115[ms]  
 Decoupling = TRUE  
 Initial\_Wait = 1[s]  
 Noe = TRUE  
 Noe\_Time = 2[s]  
 Repetition\_Time = 3.03809024[s]

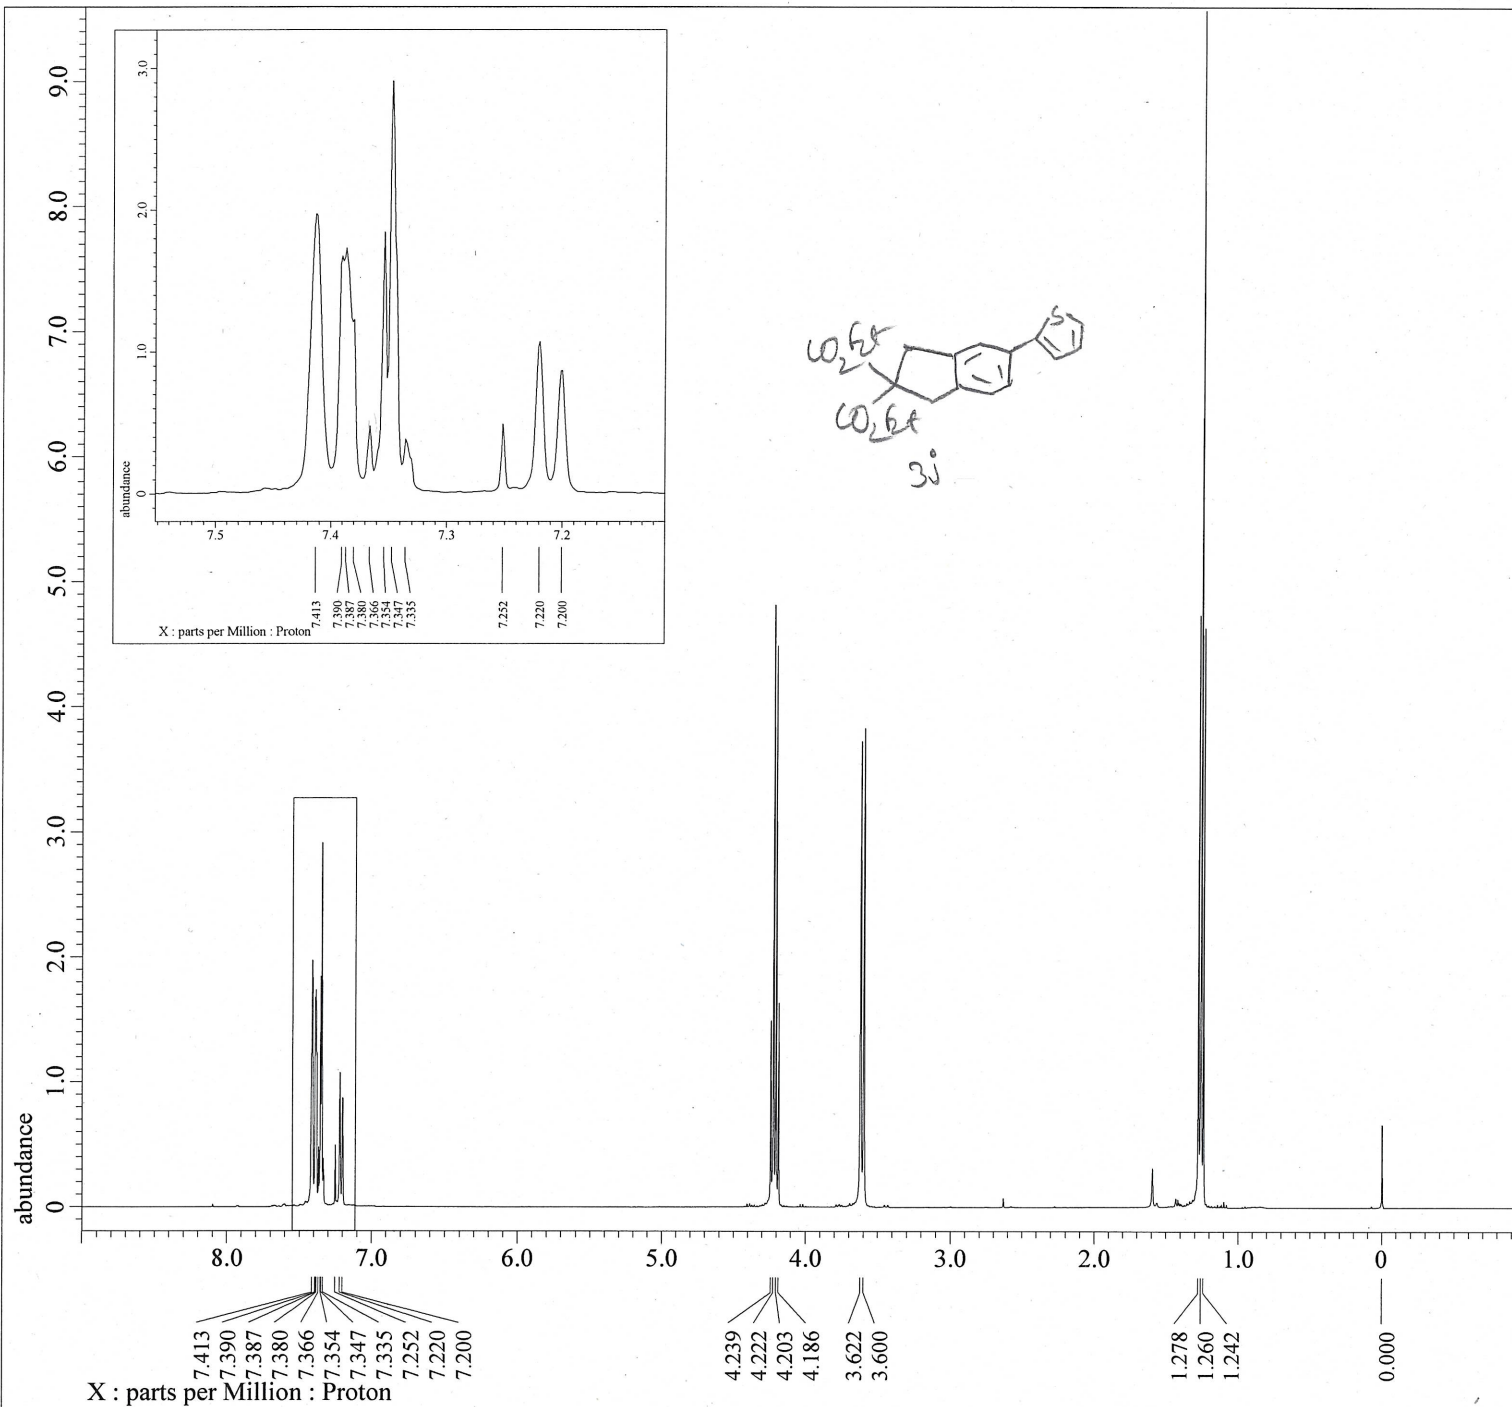

----- PROCESSING PARAMETERS -----  
 dc\_balance( 0, FALSE )  
 sexp( 0.2[Hz], 0.0[s] )  
 trapezoid( 0[%], 0[%], 80[%], 100[%] )  
 zerofill( 1 )  
 fft( 1, TRUE, TRUE )  
 machinephase  
 ppm

Derived from: Jana224\_Proton-1-1.jdf

Filename = Jana224\_Proton-1-2.jdf  
 Author = element  
 Experiment = proton.jpg  
 Sample Id = Jana224  
 Solvent = CHLOROFORM-D  
 Actual\_Start\_Time = 6-JUN-2024 15:09:13  
 Revision\_Time = 15-JUN-2024 17:02:04

Comment = single\_pulse  
 Data\_Format = 1D\_COMPLEX  
 Dim\_Size = 13107  
 X\_Domain = Proton  
 Dim\_Title = Proton  
 Dim\_Units = [ppm]  
 Dimensions = X  
 Spectrometer = DELTA2\_NMR

Field\_Strength = 9.4073814[T] (400[MHz])  
 X\_Acq\_Duration = 2.18103808[s]  
 X\_Domain = 1H  
 X\_Freq = 400.53219825[MHz]  
 X\_Offset = 5[ppm]  
 X\_Points = 16384  
 X\_Prescans = 1  
 X\_Resolution = 0.45849727[Hz]  
 X\_Sweep = 7.51201923[kHz]  
 X\_Sweep\_Clipped = 6.00961538[kHz]  
 Irr\_Domain = Proton  
 Irr\_Freq = 400.53219825[MHz]  
 Irr\_Offset = 5[ppm]  
 Tri\_Domain = Proton  
 Tri\_Freq = 400.53219825[MHz]  
 Tri\_Offset = 5[ppm]  
 Clipped = FALSE  
 Scans = 8  
 Total\_Scans = 8

Relaxation\_Delay = 5[s]  
 Recvr\_Gain = 30  
 Temp\_Get = 20.3[dC]  
 X\_90\_Width = 6.7[us]  
 X\_Acq\_Time = 2.18103808[s]  
 X\_Angle = 45[deg]  
 X\_Atn = 0.8[dB]  
 X\_Pulse = 3.35[us]  
 Irr\_Mode = Off  
 Tri\_Mode = Off  
 Dante\_Presat = FALSE  
 Initial\_Wait = 1[s]  
 Repetition\_Time = 7.18103808[s]

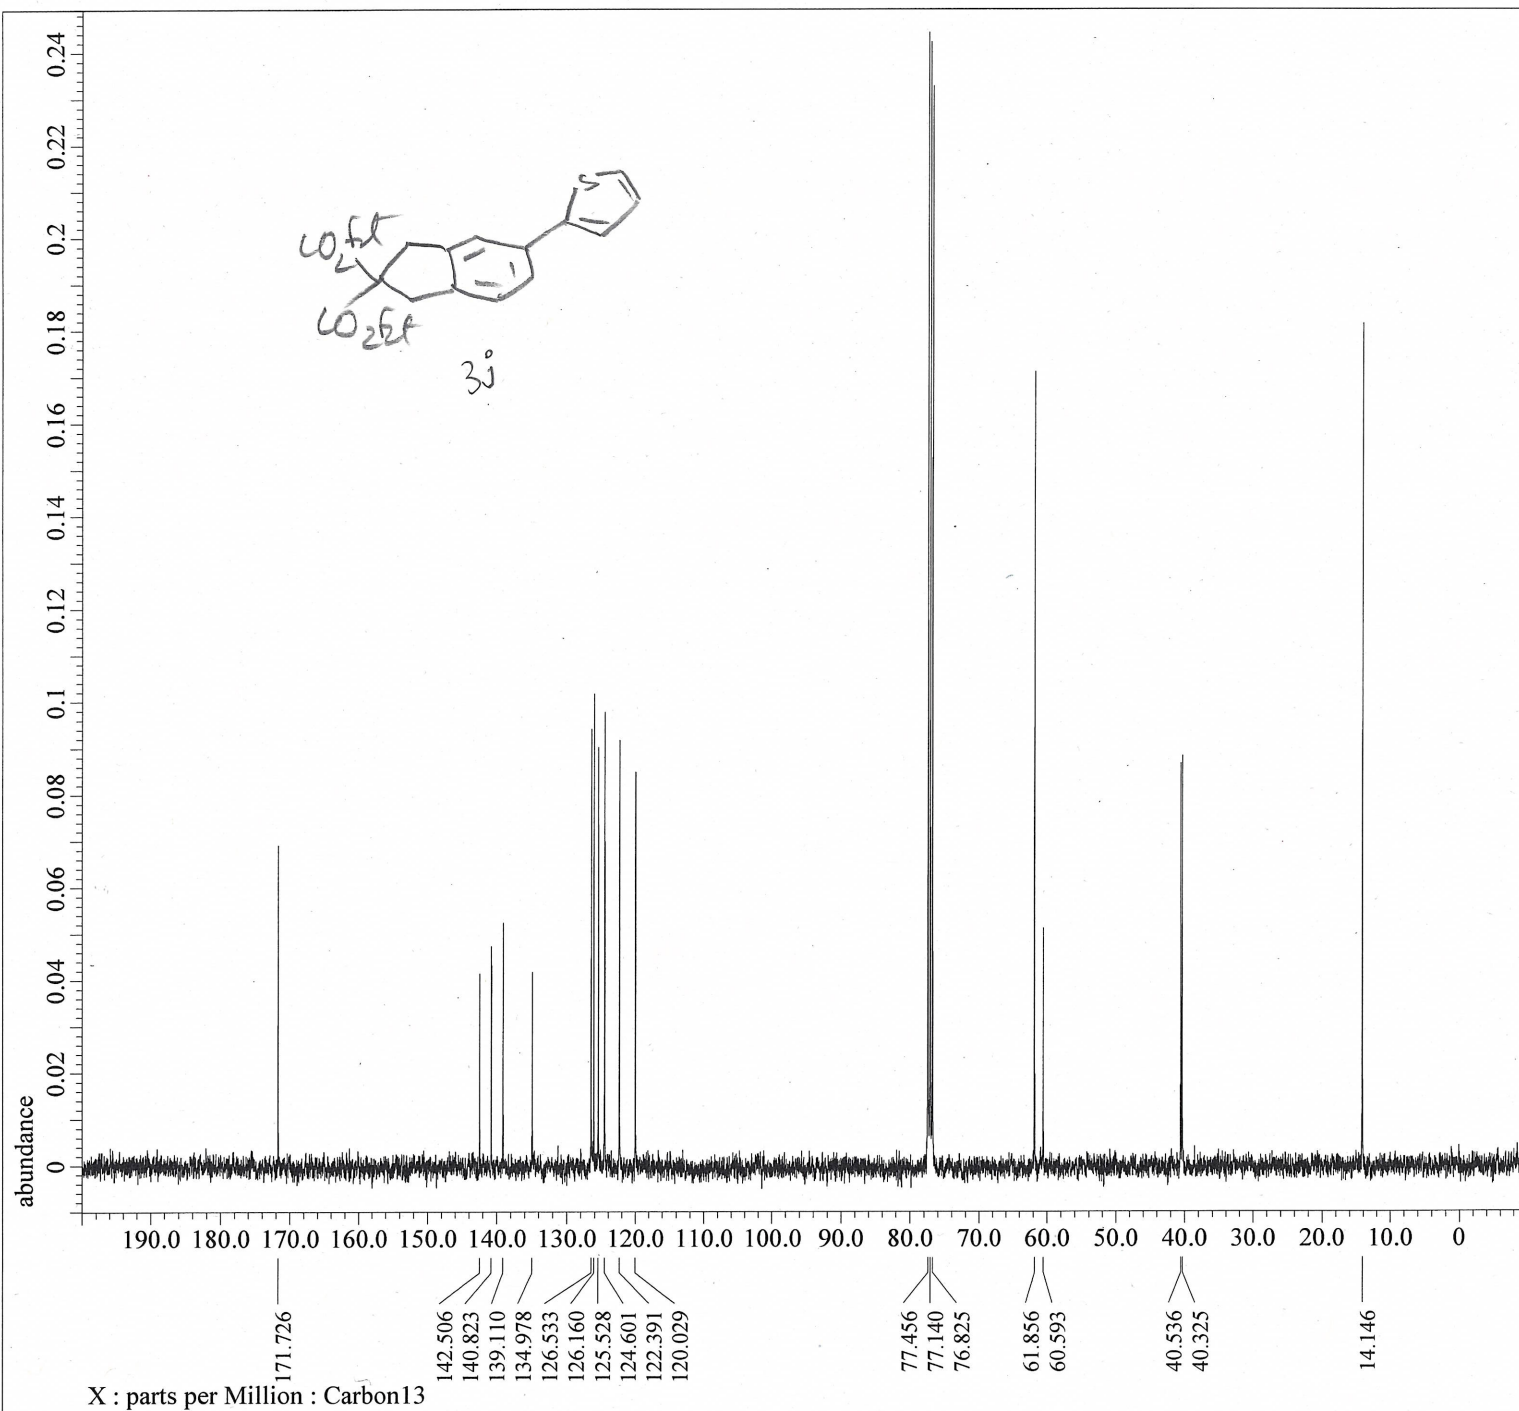

```

---- PROCESSING PARAMETERS ----
dc_balance( 0, FALSE )
sexf( 2.0[Hz], 0.0[s] )
trapezoid( 0[%], 0[%], 80[%], 100[%] )
zerofill( 1 )
fft( 1, TRUE, TRUE )
machinephase
ppm

```

Derived from: Jana224\_Carbon-1-1.jdf

```

Filename      = Jana224_Carbon-1-2.jdf
Author        = element
Experiment     = carbon.jxp
Sample_Id     = Jana224
Solvent       = CHLOROFORM-D
Actual_Start_Time = 6-JUN-2024 15:10:32
Revision_Time  = 15-JUN-2024 17:03:47

```

```

Comment       = single pulse decoupled ga
Data_Format   = 1D COMPLEX
Dim_Size      = 26214
X_Domain      = Carbon
Dim_Title     = Carbon13
Dim_Units     = [ppm]
Dimensions    = X
Spectrometer  = DELTA2_NMR

```

```

Field_Strength = 9.4073814[T] (400[MHz])
X_Acq_Duration = 1.03809024[s]
X_Domain       = 13C
X_Freq        = 100.71389092[MHz]
X_Offset      = 100[ppm]
X_Points      = 32768
X_Prescans    = 4
X_Resolution  = 0.96330739[Hz]
X_Sweep       = 31.56565657[kHz]
X_Sweep_Clipped = 25.25252525[kHz]
Irr_Domain    = Proton
Irr_Freq      = 400.53219825[MHz]
Irr_Offset    = 5[ppm]
Clipped       = FALSE
Scans         = 250
Total_Scans   = 250

```

```

Relaxation_Delay = 2[s]
Recvr_Gain       = 50
Temp_Get        = 20.3[dC]
X_90_Width      = 12.68[us]
X_Acq_Time      = 1.03809024[s]
X_Angle         = 30[deg]
X_Atn           = 4[dB]
X_Pulse         = 4.22666667[us]
Irr_Atn_Dec     = 26.45[dB]
Irr_Atn_Noise   = 26.45[dB]
Irr_Noise       = WALTZ
Irr_Pwidth      = 0.115[ms]
Decoupling      = TRUE
Initial_Wait    = 1[s]
Noe             = TRUE
Noe_Time        = 2[s]
Repetition_Time = 3.03809024[s]

```



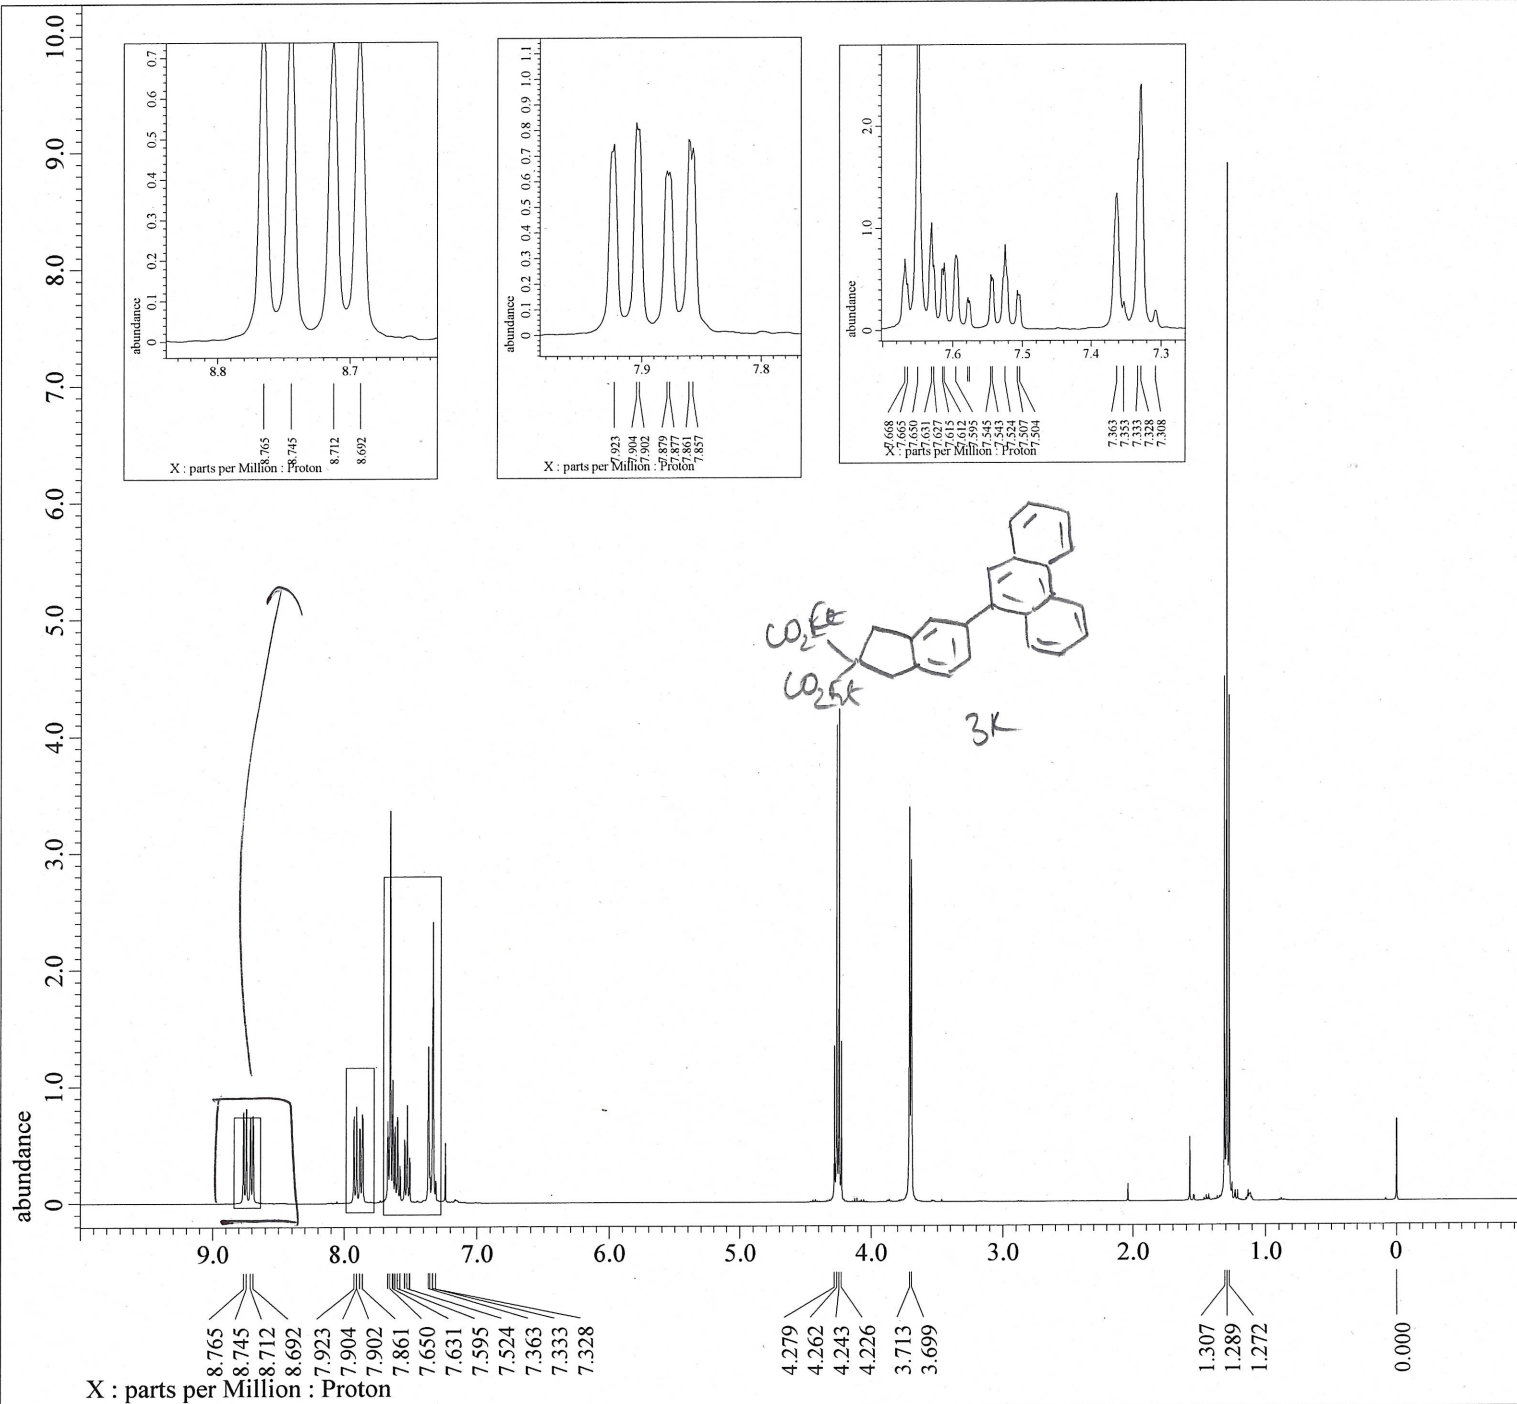

```

---- PROCESSING PARAMETERS ----
dc_balance( 0, FALSE )
sexp( 0.2[Hz], 0.0[s] )
trapezoid( 0[%], 0[%], 80[%], 100[%] )
zerofill( 1 )
fft( 1, TRUE, TRUE )
machinphase
ppm

```

Derived from: Jana222\_Proton-1-1.jdf

```

Filename      = Jana222_Proton-1-2.jdf
Author       = element
Experiment   = proton.jxp
Sample_Id    = Jana222
Solvent      = CHLOROFORM-D
Actual_Start_Time = 4-JUN-2024 21:01:46
Revision_Time = 15-JUN-2024 16:33:37

```

```

Comment      = single_pulse
Data_Format  = 1D COMPLEX
Dim_Size     = 13107
X_Domain     = Proton
Dim_Title    = Proton
Dim_Units    = [ppm]
Dimensions   = X
Spectrometer = DELTA2_NMR

```

```

Field_Strength = 9.4073814[T] (400[MHz])
X_Acq_Duration = 2.18103808[s]
X_Domain      = 1H
X_Freq        = 400.53219825[MHz]
X_Offset      = 5[ppm]
X_Points      = 16384
X_Prescans    = 1
X_Resolution  = 0.45849727[Hz]
X_Sweep       = 7.51201923[kHz]
X_Sweep_Clipped = 6.00961538[kHz]
Irr_Domain    = Proton
Irr_Freq      = 400.53219825[MHz]
Irr_Offset    = 5[ppm]
Tri_Domain    = Proton
Tri_Freq      = 400.53219825[MHz]
Tri_Offset    = 5[ppm]
Clipped       = FALSE
Scans         = 8
Total_Scans   = 8

```

```

Relaxation_Delay = 5[s]
Recvr_Gain       = 30
Temp_Get         = 21.3[dC]
X_90_Width       = 6.7[us]
X_Acq_Time       = 2.18103808[s]
X_Angle          = 45[deg]
X_Atn            = 0.8[dB]
X_Pulse          = 3.35[us]
Irr_Mode         = Off
Tri_Mode         = Off
Dante_Presat     = FALSE
Initial_Wait     = 1[s]
Repetition_Time  = 7.18103808[s]

```





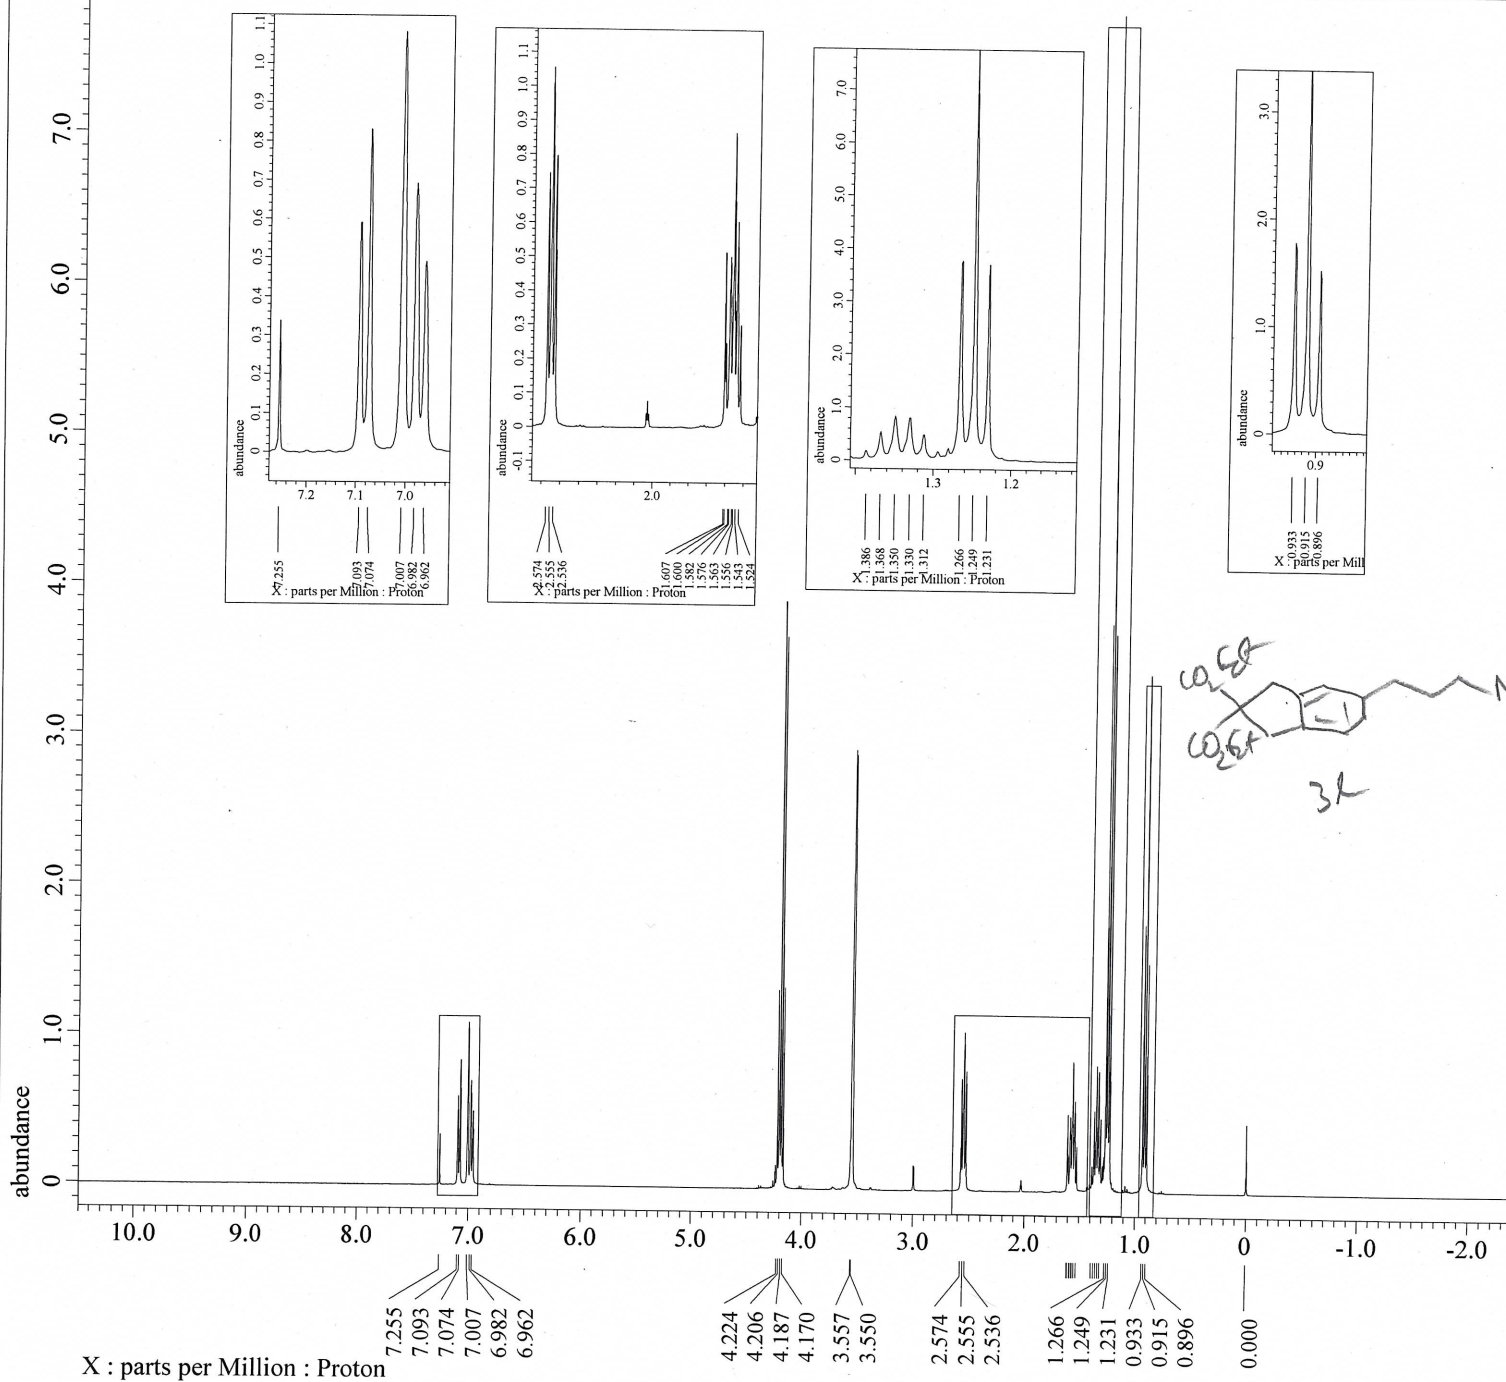

```

----- PROCESSING PARAMETERS -----
dc_balance( 0, FALSE )
sexp( 0.2[Hz], 0.0[s] )
trapezoid( 0[%], 0[%], 80[%], 100[%] )
zerofill( 1 )
fft( 1, TRUE, TRUE )
machinephase
ppm

Derived from: Jana218p_Proton-1-1.jdf

Filename      = Jana218p_Proton-1-2.jdf
Author       = element
Experiment   = proton.jxp
Sample_Id    = Jana218p
Solvent      = CHLOROFORM-D
Actual_Start_Time = 31-MAY-2024 10:09:29
Revision_Time   = 12-FEB-2025 10:27:09

Comment      = single pulse
Data Format   = 1D COMPLEX
Dim_Size     = 13107
X_Domain     = Proton
Dim_Title    = Proton
Dim_Units    = [ppm]
Dimensions   = X
Spectrometer = DELTA2_NMR

Field Strength = 9.4073814[T] (400[MHz])
X_Acq_Duration = 2.18103808[s]
X_Domain       = 1H
X_Freq         = 400.53219825[MHz]
X_Offset       = 5[ppm]
X_Points       = 16384
X_Prescans     = 1
X_Resolution   = 0.45849727[Hz]
X_Sweep        = 7.51201923[kHz]
X_Sweep_Clippped = 6.00961538[kHz]
Irr_Domain     = Proton
Irr_Freq       = 400.53219825[MHz]
Irr_Offset     = 5[ppm]
Tri_Domain     = Proton
Tri_Freq       = 400.53219825[MHz]
Tri_Offset     = 5[ppm]
Clipped        = FALSE
Scans          = 8
Total_Scans    = 8

Relaxation_Delay = 5[s]
Recvr_Gain       = 26
Temp_Get         = 20.4[dC]
X_90_Width       = 6.7[us]
X_Acq_Time       = 2.18103808[s]
X_Angle          = 45[deg]
X_Atn            = 0.8[dB]
X_Pulse          = 3.35[us]
Irr_Mode         = Off
Tri_Mode         = Off
Dante_Presat     = FALSE
Initial_Wait     = 1[s]
Repetition_Time  = 7.18103808[s]

```

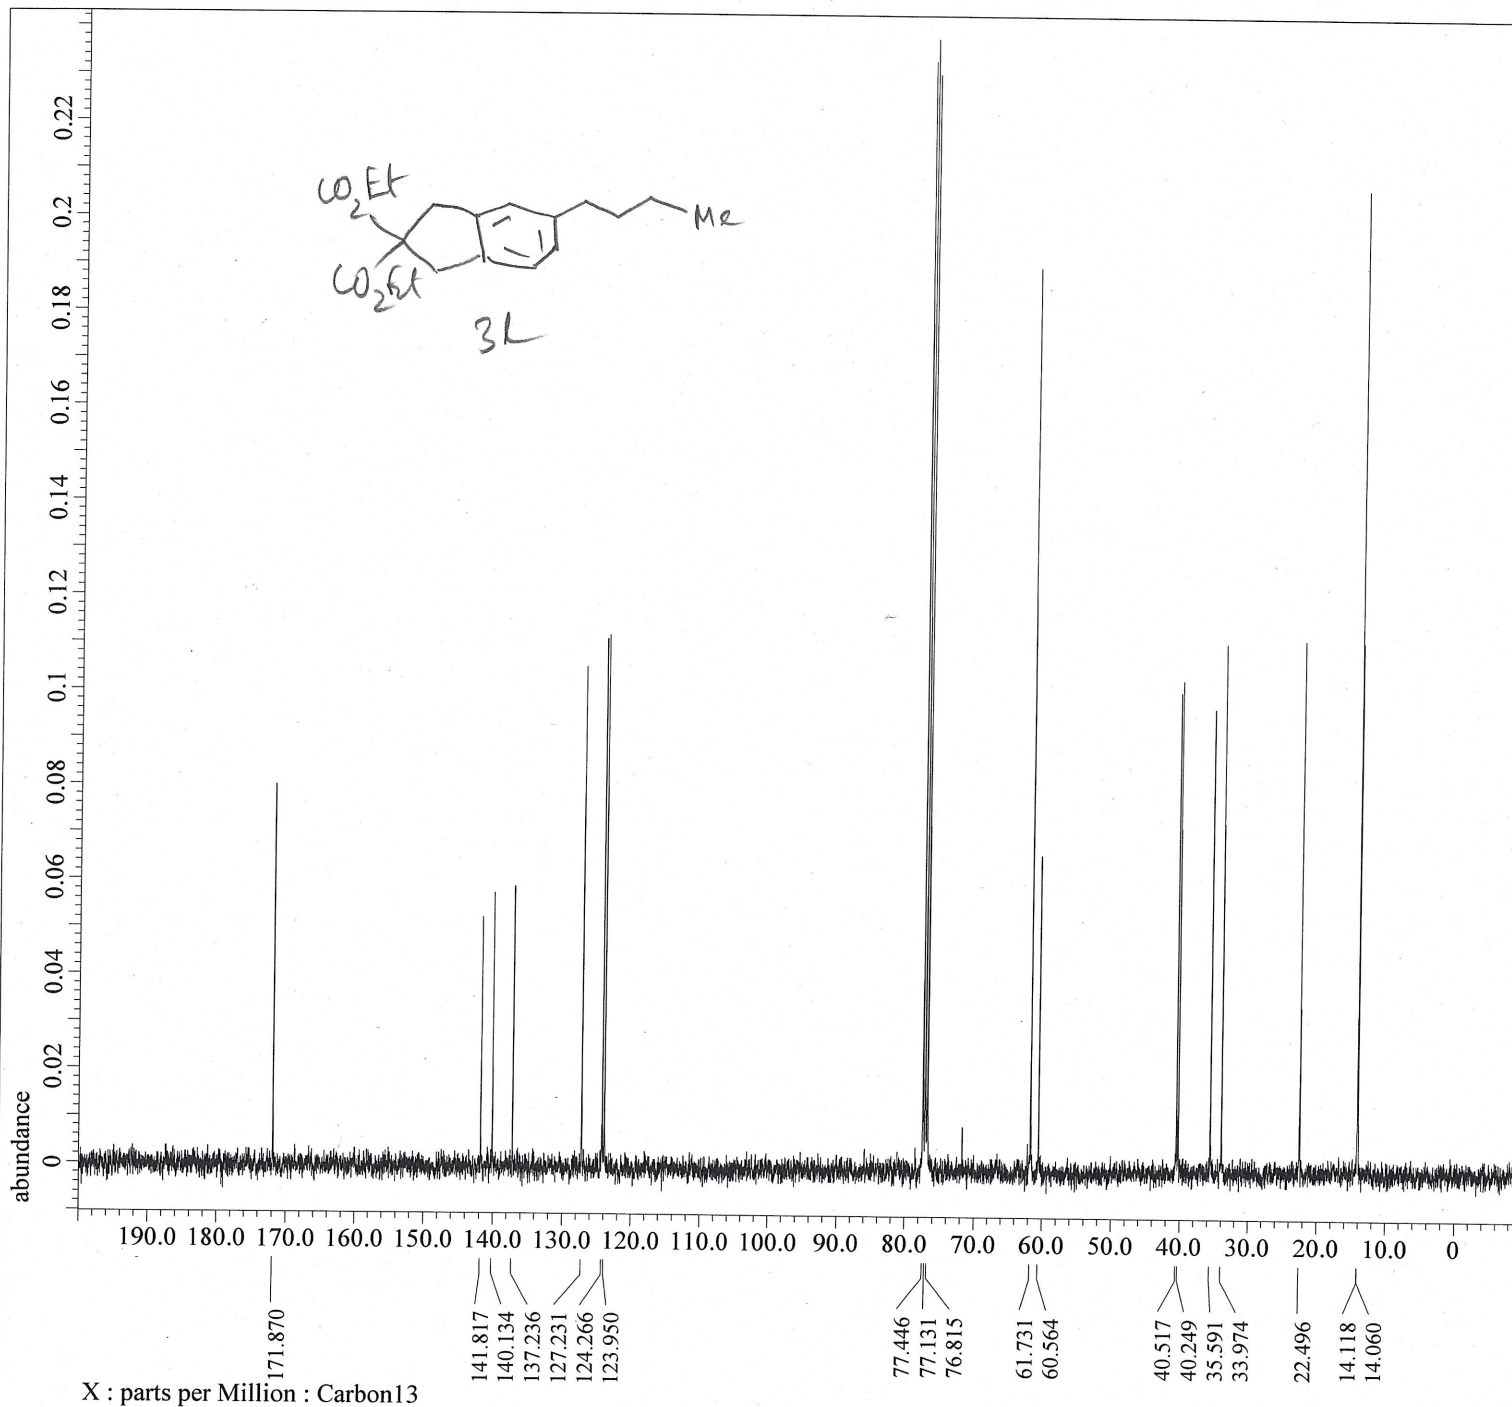

----- PROCESSING PARAMETERS -----  
 dc\_balance( 0, FALSE )  
 sexp( 2.0[Hz], 0.0[s] )  
 trapezoid( 0[%], 0[%], 80[%], 100[%] )  
 zerofill( 1 )  
 fft( 1, TRUE, TRUE )  
 machinephase  
 ppm

Derived from: Jana218p\_Carbon-1-1.jdf

Filename = Jana218p\_Carbon-1-2.jdf  
 Author = element  
 Experiment = carbon.jxp  
 Sample\_Id = Jana218p  
 Solvent = CHLOROFORM-D  
 Actual\_Start\_Time = 31-MAY-2024 10:16:19  
 Revision\_Time = 15-JUN-2024 15:52:57

Comment = single pulse decoupled ga  
 Data Format = 1D COMPLEX  
 Dim\_Size = 26214  
 X\_Domain = Carbon  
 Dim\_Title = Carbon13  
 Dim\_Units = [ppm]  
 Dimensions = X  
 Spectrometer = DELTA2\_NMR

Field\_Strength = 9.4073814[T] (400[MHz])  
 X\_Acq\_Duration = 1.03809024[s]  
 X\_Domain = 13C  
 X\_Freq = 100.71389092[MHz]  
 X\_Offset = 100[ppm]  
 X\_Points = 32768  
 X\_Prescans = 4  
 X\_Resolution = 0.96330739[Hz]  
 X\_Sweep = 31.56565657[kHz]  
 X\_Sweep\_Clipped = 25.25252525[kHz]  
 Irr\_Domain = Proton  
 Irr\_Freq = 400.53219825[MHz]  
 Irr\_Offset = 5[ppm]  
 Clipped = FALSE  
 Scans = 250  
 Total\_Scans = 250

Relaxation\_Delay = 2[s]  
 Recvr\_Gain = 50  
 Temp\_Get = 20[dC]  
 X\_90\_Width = 12.68[us]  
 X\_Acq\_Time = 1.03809024[s]  
 X\_Angle = 30[deg]  
 X\_Atn = 4[dB]  
 X\_Pulse = 4.22666667[us]  
 Irr\_Atn\_Dec = 26.45[dB]  
 Irr\_Atn\_Noise = 26.45[dB]  
 Irr\_Noise = WALTZ  
 Irr\_Pwidth = 0.115[ms]  
 Decoupling = TRUE  
 Initial\_Wait = 1[s]  
 Noe = TRUE  
 Noe\_Time = 2[s]  
 Repetition\_Time = 3.03809024[s]

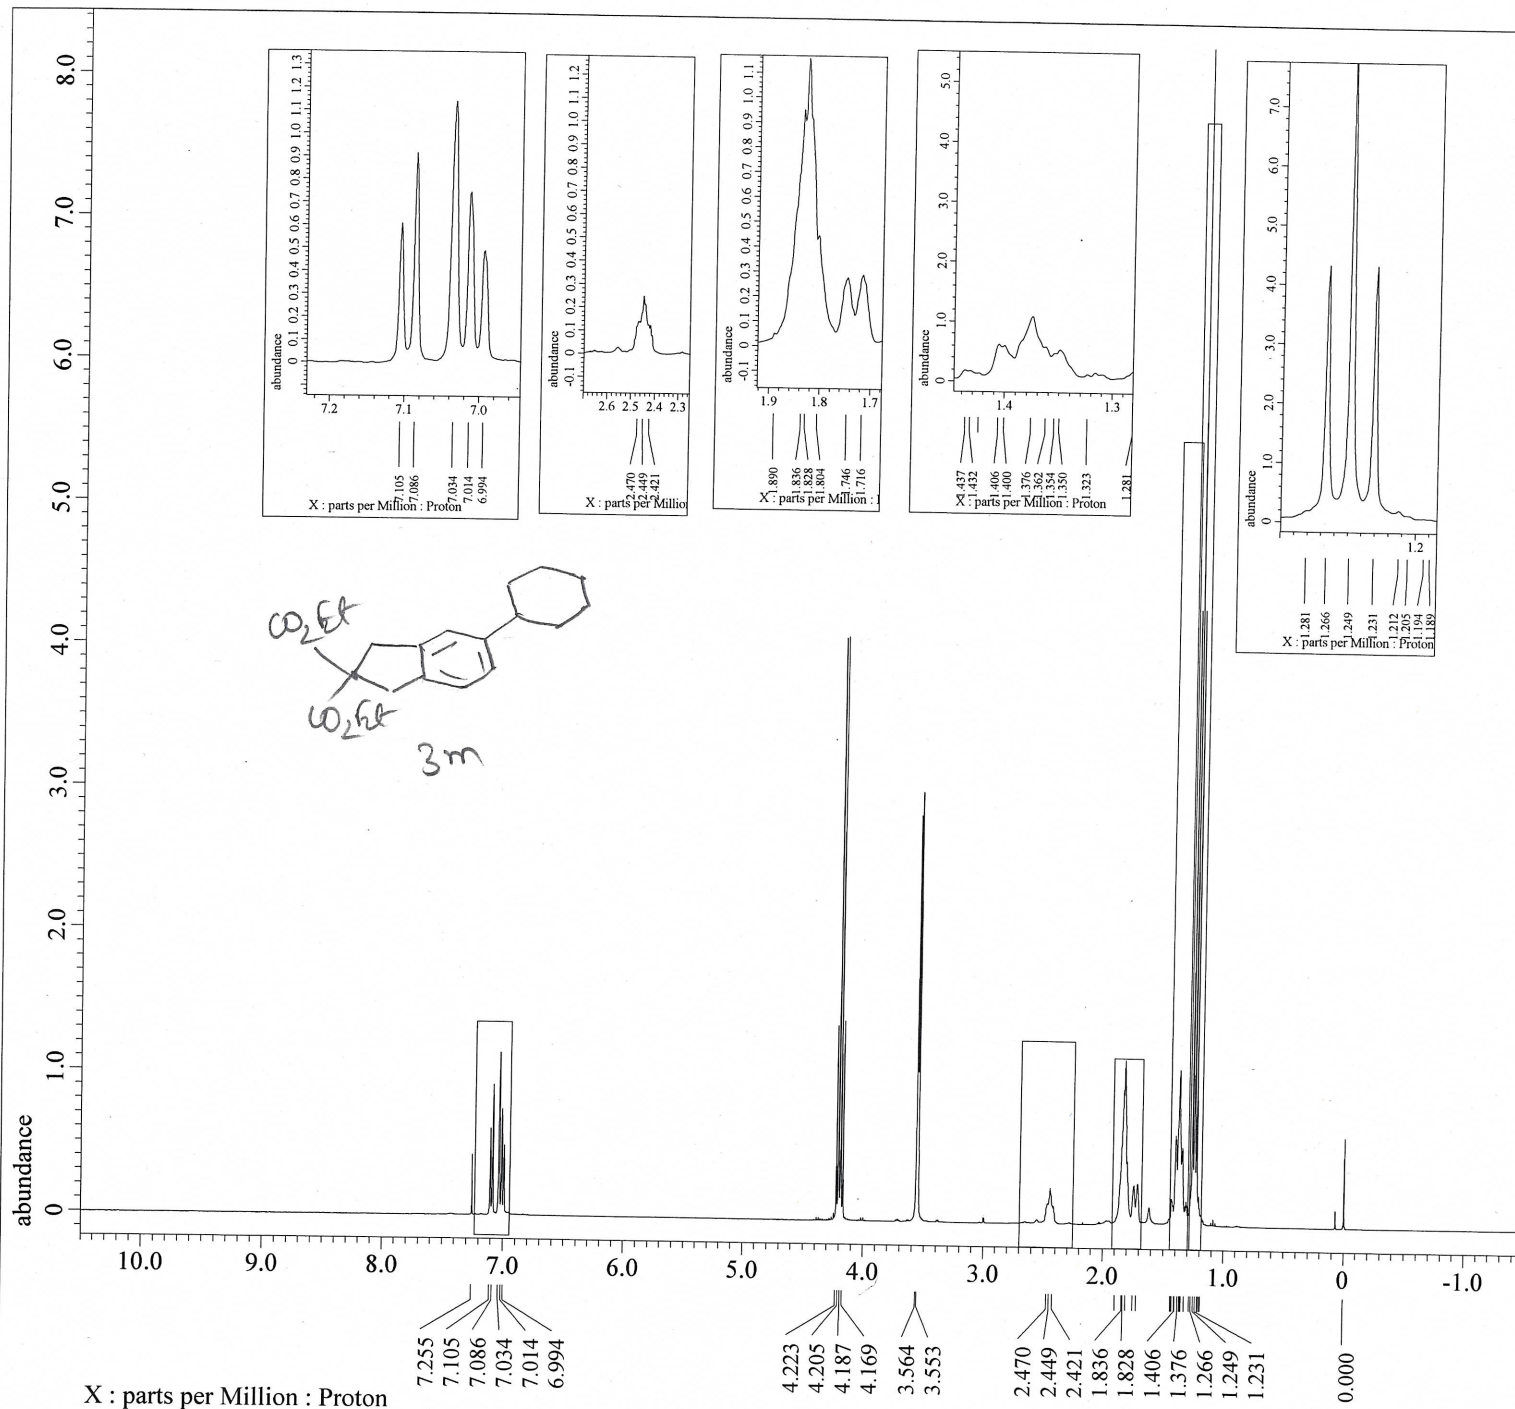

```

---- PROCESSING PARAMETERS ----
dc balance( 0, FALSE )
sexp( 0.2[Hz], 0.0[s] )
trapezoid( 0[%], 0[%], 80[%], 100[%] )
zerofill( 1 )
fft( 1, TRUE, TRUE )
machinephase
ppm

```

Derived from: Jana234\_Proton-1-1.jdf

```

Filename      = Jana234_Proton-1-2.jdf
Author       = element
Experiment   = proton.jxp
Sample_Id    = Jana234
Solvent      = CHLOROFORM-D
Actual_Start_Time = 14-JUN-2024 13:17:17
Revision_Time  = 12-FEB-2025 10:40:18

```

```

Comment      = single pulse
Data Format   = 1D COMPLEX
Dim_Size     = 13107
X_Domain     = Proton
Dim_Title    = Proton
Dim_Units    = [ppm]
Dimensions   = X
Spectrometer = DELTA2_NMR

```

```

Field_Strength = 9.4073814[T] (400[MHz])
X_Acq_Duration = 2.18103808[s]
X_Domain      = 1H
X_Freq       = 400.53219825[MHz]
X_Offset     = 5[ppm]
X_Points     = 16384
X_Prescans   = 1
X_Resolution = 0.45849727[Hz]
X_Sweep      = 7.51201923[kHz]
X_Sweep_Clipped = 6.00961538[kHz]
Irr_Domain   = Proton
Irr_Freq     = 400.53219825[MHz]
Irr_Offset   = 5[ppm]
Tri_Domain   = Proton
Tri_Freq     = 400.53219825[MHz]
Tri_Offset   = 5[ppm]
Clipped      = FALSE
Scans        = 8
Total_Scans  = 8

```

```

Relaxation_Delay = 5[s]
Recvr_Gain       = 28
Temp_Get         = 20.1[dC]
X_90_Width      = 6.7[us]
X_Acq_Time      = 2.18103808[s]
X_Angle         = 45[deg]
X_Atn           = 0.8[dB]
X_Pulse         = 3.35[us]
Irr_Mode        = Off
Tri_Mode        = Off
Dante_Presat    = FALSE
Initial_Wait    = 1[s]
Repetition_Time = 7.18103808[s]

```



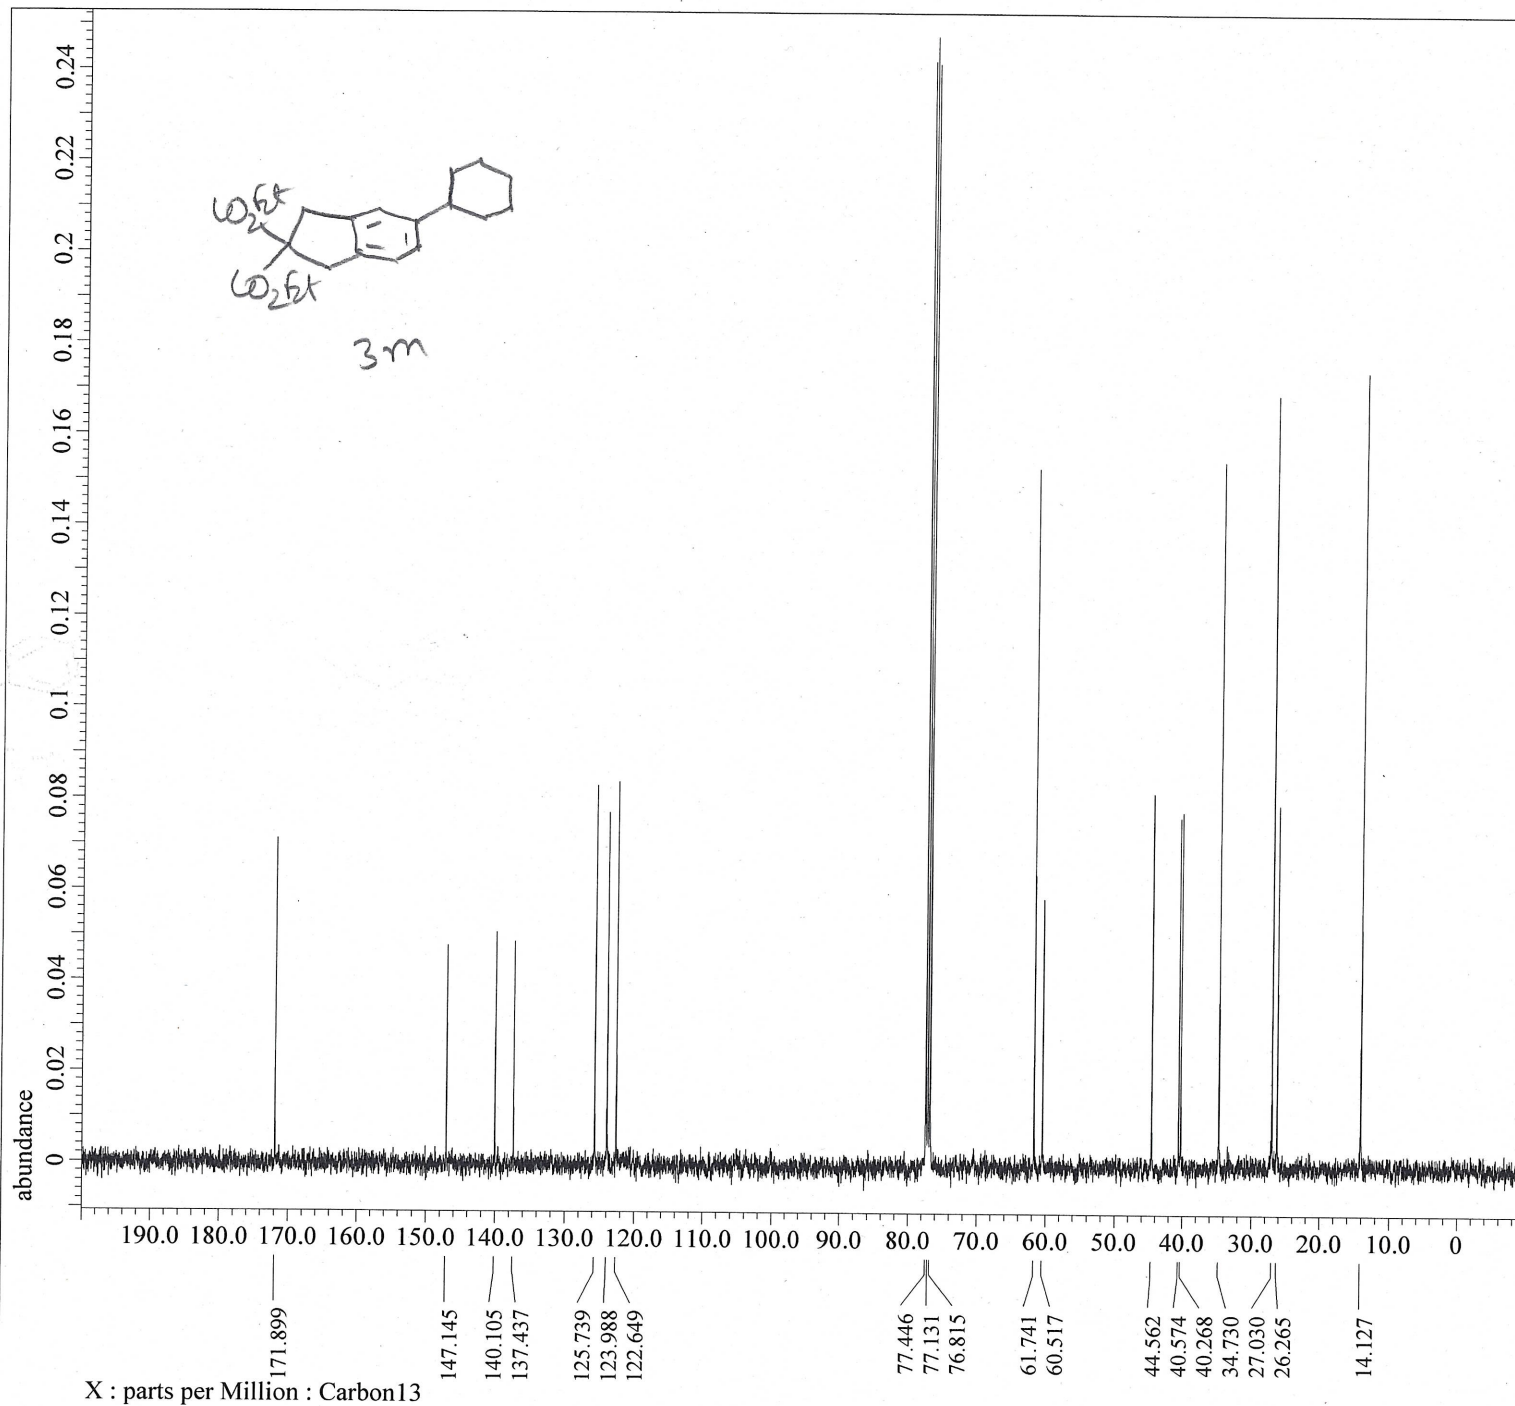

----- PROCESSING PARAMETERS -----  
 dc\_balance( 0, FALSE )  
 sexp( 2.0[Hz], 0.0[s] )  
 trapezoid( 0[%], 0[%], 80[%], 100[%] )  
 zerofill( 1 )  
 fft( 1, TRUE, TRUE )  
 machinephase  
 ppm

Derived from: Jana234\_Carbon-1-1.jdf

Filename = Jana234\_Carbon-1-2.jdf  
 Author = element  
 Experiment = carbon.jpg  
 Sample\_Id = Jana234  
 Solvent = CHLOROFORM-D  
 Actual\_Start\_Time = 14-JUN-2024 13:18:37  
 Revision\_Time = 24-JUN-2024 18:44:54

Comment = single pulse decoupled ga  
 Data\_Format = 1D COMPLEX  
 Dim\_Size = 26214  
 X\_Domain = Carbon  
 Dim\_Title = Carbon13  
 Dim\_Units = [ppm]  
 Dimensions = X  
 Spectrometer = DELTA2\_NMR

Field\_Strength = 9.4073814[T] (400[MHz])  
 X\_Acq\_Duration = 1.03809024[s]  
 X\_Domain = 13C  
 X\_Freq = 100.71389092[MHz]  
 X\_Offset = 100[ppm]  
 X\_Points = 32768  
 X\_Prescans = 4  
 X\_Resolution = 0.96330739[Hz]  
 X\_Sweep = 31.56565657[kHz]  
 X\_Sweep\_Clipped = 25.25252525[kHz]  
 Irr\_Domain = Proton  
 Irr\_Freq = 400.53219825[MHz]  
 Irr\_Offset = 5[ppm]  
 Clipped = FALSE  
 Scans = 300  
 Total\_Scans = 300

Relaxation\_Delay = 2[s]  
 Recvr\_Gain = 50  
 Temp\_Get = 20[dC]  
 X\_90\_Width = 12.68[us]  
 X\_Acq\_Time = 1.03809024[s]  
 X\_Angle = 30[deg]  
 X\_Atn = 4[dB]  
 X\_Pulse = 4.22666667[us]  
 Irr\_Atn\_Dec = 26.45[dB]  
 Irr\_Atn\_Noe = 26.45[dB]  
 Irr\_Noise = WALTZ  
 Irr\_Pwidth = 0.115[ms]  
 Decoupling = TRUE  
 Initial\_Wait = 1[s]  
 Noe = TRUE  
 Noe\_Time = 2[s]  
 Repetition\_Time = 3.03809024[s]

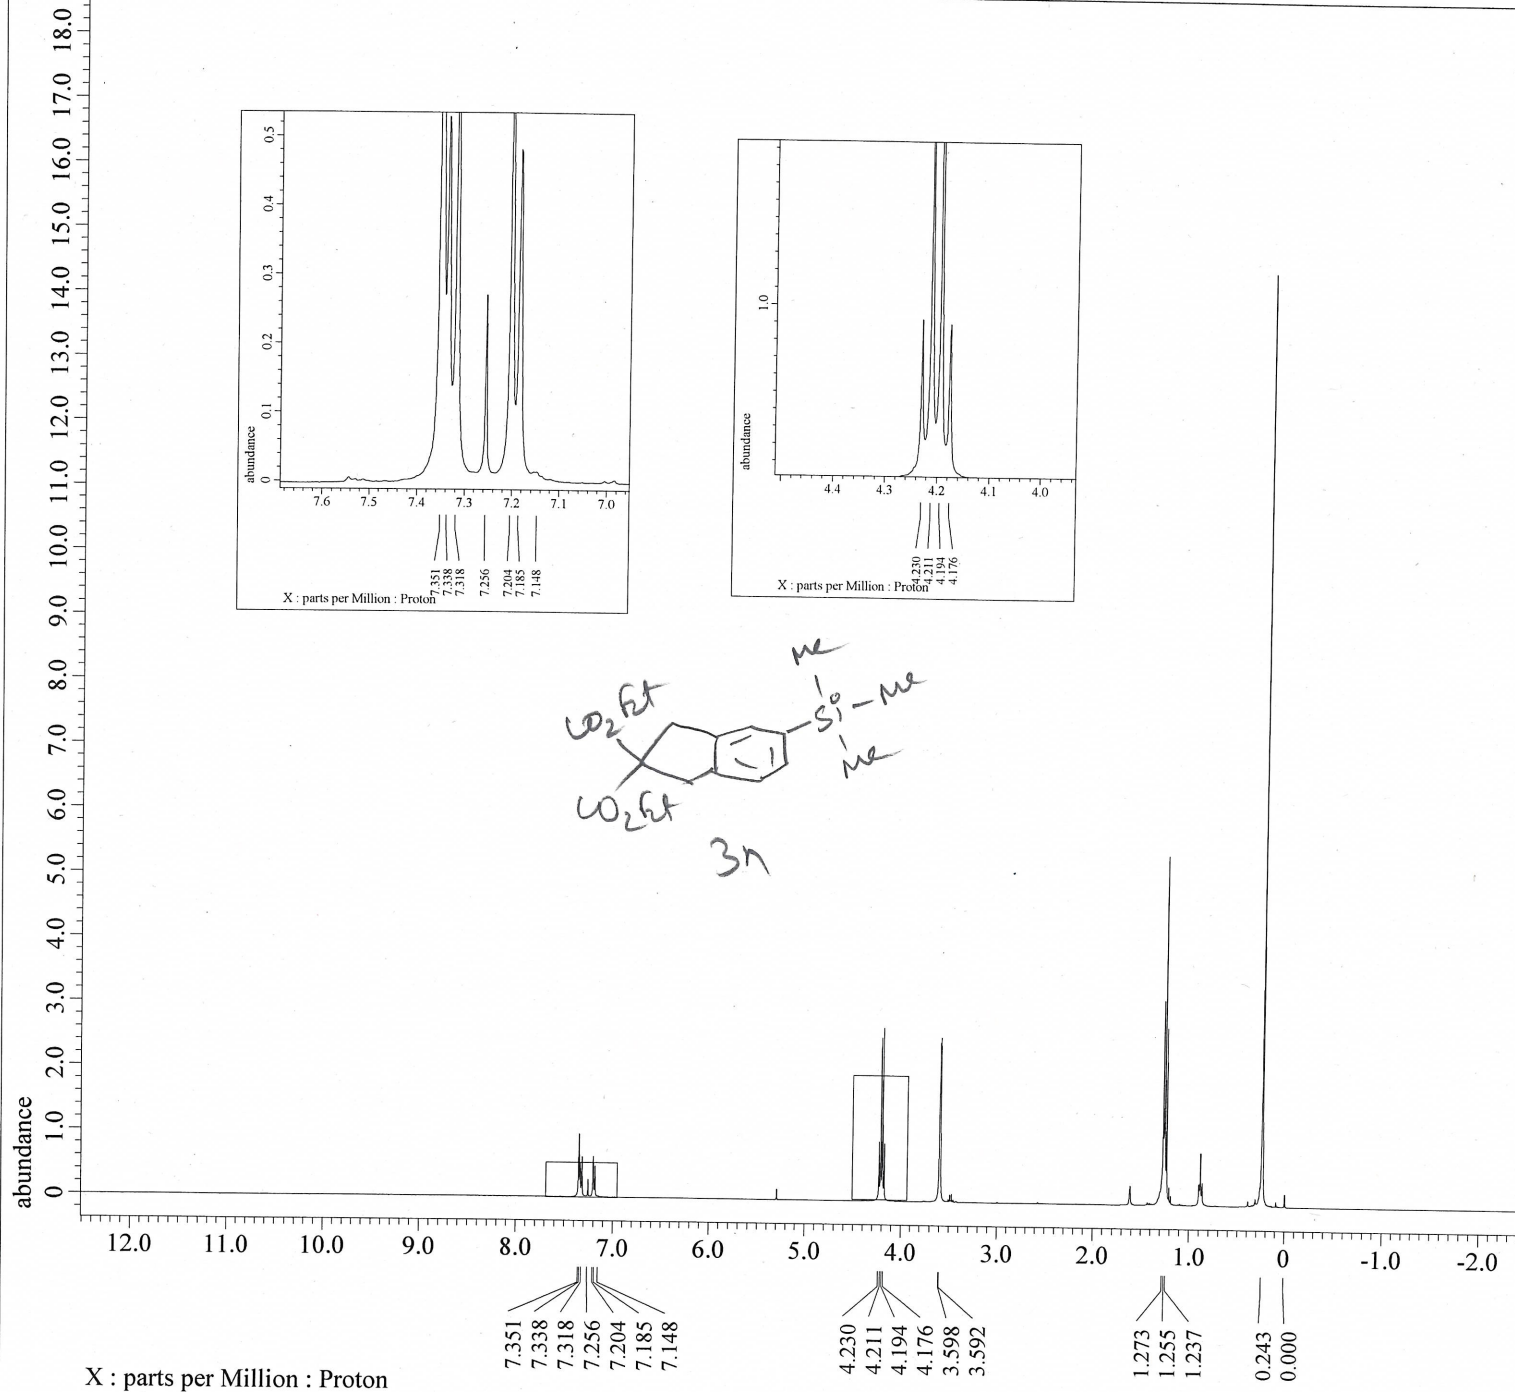

----- PROCESSING PARAMETERS -----  
 dc\_balance( 0, FALSE )  
 sexp( 0.2[Hz], 0.0[s] )  
 trapezoid( 0[%], 0[%], 80[%], 100[%] )  
 zerofill( 1 )  
 fft( 1, TRUE, TRUE )  
 machinephase  
 ppm

Derived from: Jana235r\_Proton-1-1.jdf

Filename = Jana235r\_Proton-1-2.jdf  
 Author = element  
 Experiment = proton.jxp  
 Sample\_Id = Jana235r  
 Solvent = CHLOROFORM-D  
 Actual\_Start\_Time = 3-SEP-2024 17:03:35  
 Revision\_Time = 18-JAN-2025 15:47:30

Comment = single pulse  
 Data Format = 1D COMPLEX  
 Dim\_Size = 13107  
 X\_Domain = Proton  
 Dim\_Title = Proton  
 Dim\_Units = [ppm]  
 Dimensions = X  
 Spectrometer = DELTA2\_NMR

Field\_Strength = 9.4073814[T] (400[MHz])  
 X\_Acq\_Duration = 2.18103808[s]  
 X\_Domain = 1H  
 X\_Freq = 400.53219825[MHz]  
 X\_Offset = 5[ppm]  
 X\_Points = 16384  
 X\_Prescans = 1  
 X\_Resolution = 0.45849727[Hz]  
 X\_Sweep = 7.51201923[kHz]  
 X\_Sweep\_Clippped = 6.00961538[kHz]  
 Irr\_Domain = Proton  
 Irr\_Freq = 400.53219825[MHz]  
 Irr\_Offset = 5[ppm]  
 Tri\_Domain = Proton  
 Tri\_Freq = 400.53219825[MHz]  
 Tri\_Offset = 5[ppm]  
 Clipped = FALSE  
 Scans = 8  
 Total\_Scans = 8

Relaxation\_Delay = 5[s]  
 Recvr\_Gain = 28  
 Temp\_Get = 18.2[dC]  
 X\_90\_Width = 6.7[us]  
 X\_Acq\_Time = 2.18103808[s]  
 X\_Angle = 45[deg]  
 X\_Atn = 0.8[dB]  
 X\_Pulse = 3.35[us]  
 Irr\_Mode = Off  
 Tri\_Mode = Off  
 Dante\_Presat = FALSE  
 Initial\_Wait = 1[s]  
 Repetition\_Time = 7.18103808[s]

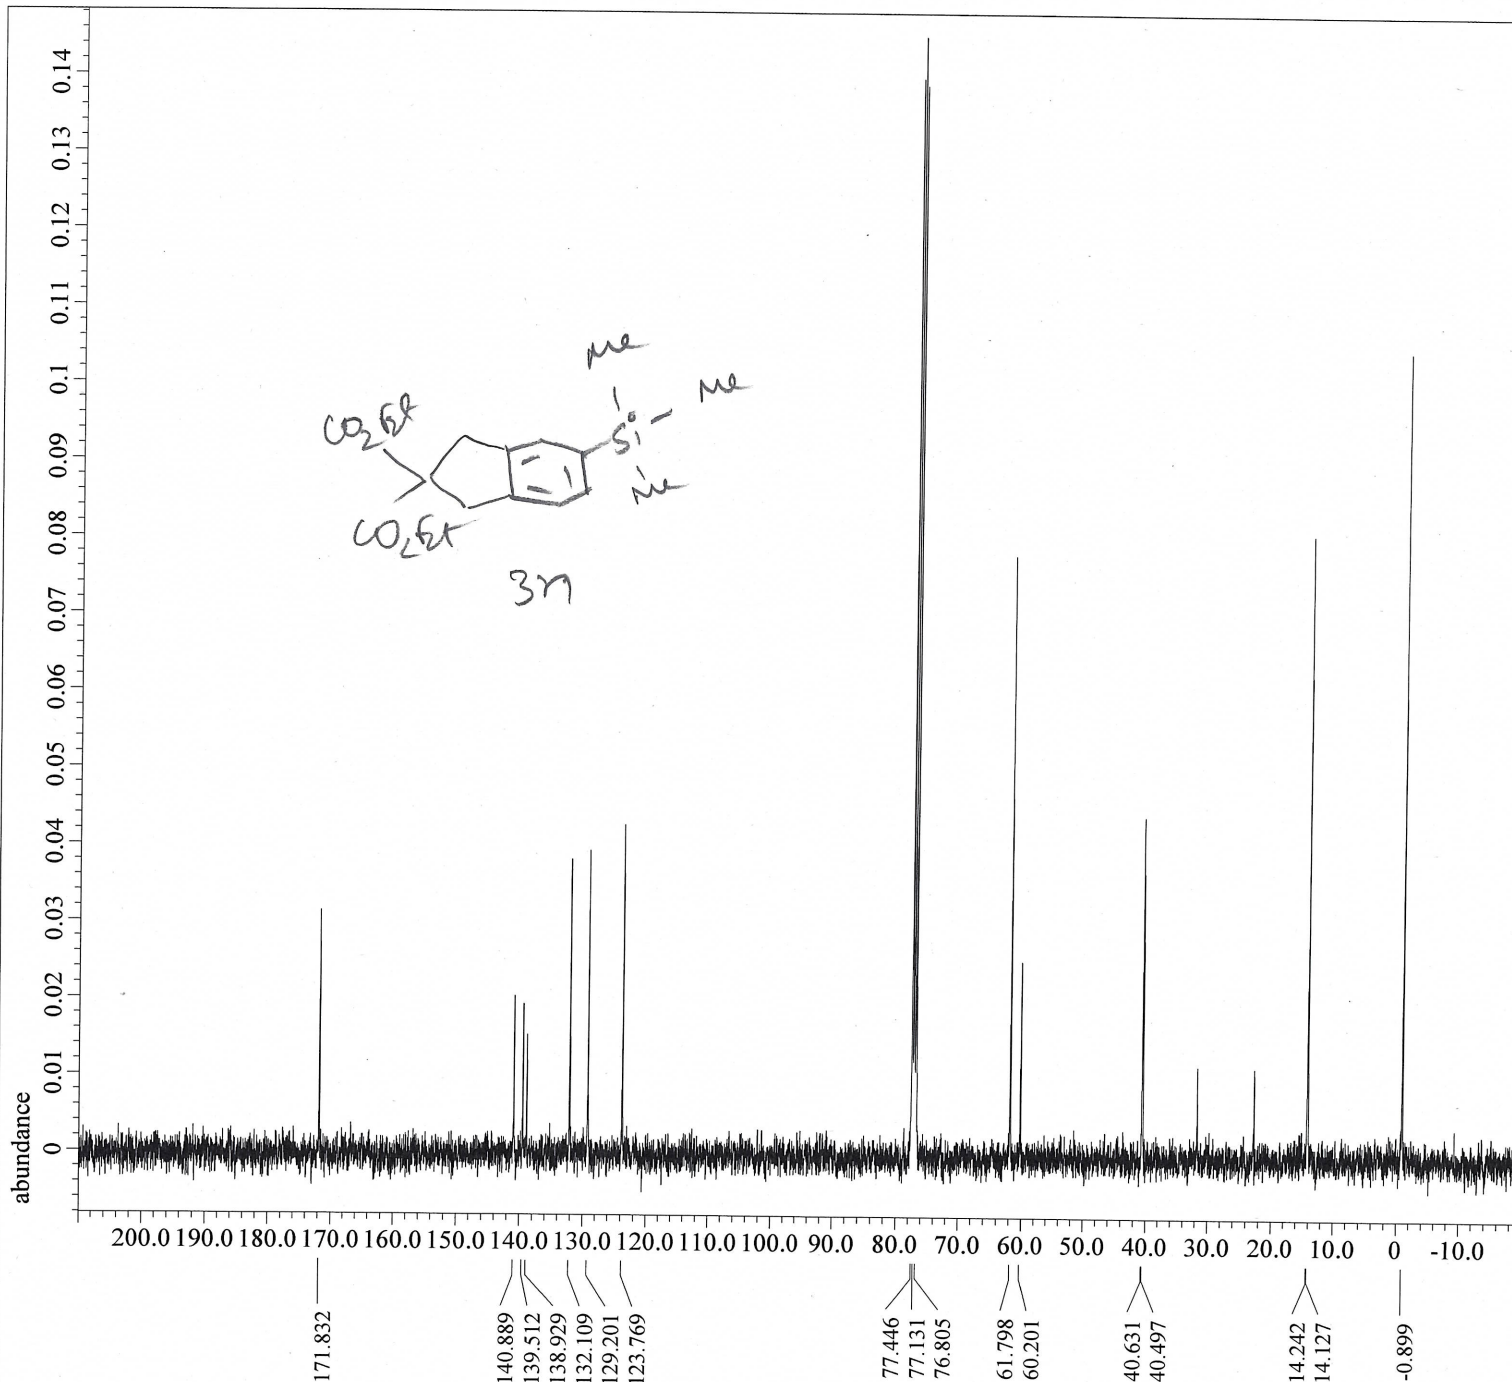

----- PROCESSING PARAMETERS -----  
 dc\_balance( 0, FALSE )  
 sexp( 2.0[Hz], 0.0[s] )  
 trapezoid( 0[%], 0[%], 80[%], 100[%] )  
 zerofill( 1 )  
 fft( 1, TRUE, TRUE )  
 machinephase  
 ppm

Derived from: Jana235r\_Carbon-1-1.jdf

Filename = Jana235r\_Carbon-1-2.jdf  
 Author = element  
 Experiment = carbon.jpg  
 Sample\_Id = Jana235r  
 Solvent = CHLOROFORM-D  
 Actual\_Start\_Time = 3-SEP-2024 17:08:54  
 Revision\_Time = 12-FEB-2025 11:10:55

Comment = single pulse decoupled ga  
 Data\_Format = 1D COMPLEX  
 Dim\_Size = 26214  
 X\_Domain = Carbon  
 Dim\_Title = Carbon13  
 Dim\_Units = [ppm]  
 Dimensions = X  
 Spectrometer = DELTA2\_NMR

Field\_Strength = 9.4073814[T] (400[MHz])  
 X\_Acq\_Duration = 1.03809024[s]  
 X\_Domain = 13C  
 X\_Freq = 100.71389092[MHz]  
 X\_Offset = 100[ppm]  
 X\_Points = 32768  
 X\_Prescans = 4  
 X\_Resolution = 0.96330739[Hz]  
 X\_Sweep = 31.56565657[kHz]  
 X\_Sweep\_Clipped = 25.25252525[kHz]  
 Irr\_Domain = Proton  
 Irr\_Freq = 400.53219825[MHz]  
 Irr\_Offset = 5[ppm]  
 Clipped = FALSE  
 Scans = 300  
 Total\_Scans = 300

Relaxation\_Delay = 2[s]  
 Recvr\_Gain = 50  
 Temp\_Get = 18.2[dC]  
 X\_90\_Width = 12.68[us]  
 X\_Acq\_Time = 1.03809024[s]  
 X\_Angle = 30[deg]  
 X\_Atn = 4[dB]  
 X\_Pulse = 4.22666667[us]  
 Irr\_Atn\_Dec = 26.45[dB]  
 Irr\_Atn\_Noise = 26.45[dB]  
 Irr\_Noise = WALTZ  
 Irr\_Pwidth = 0.115[ms]  
 Decoupling = TRUE  
 Initial\_Wait = 1[s]  
 Noe = TRUE  
 Noe\_Time = 2[s]  
 Repetition\_Time = 3.03809024[s]



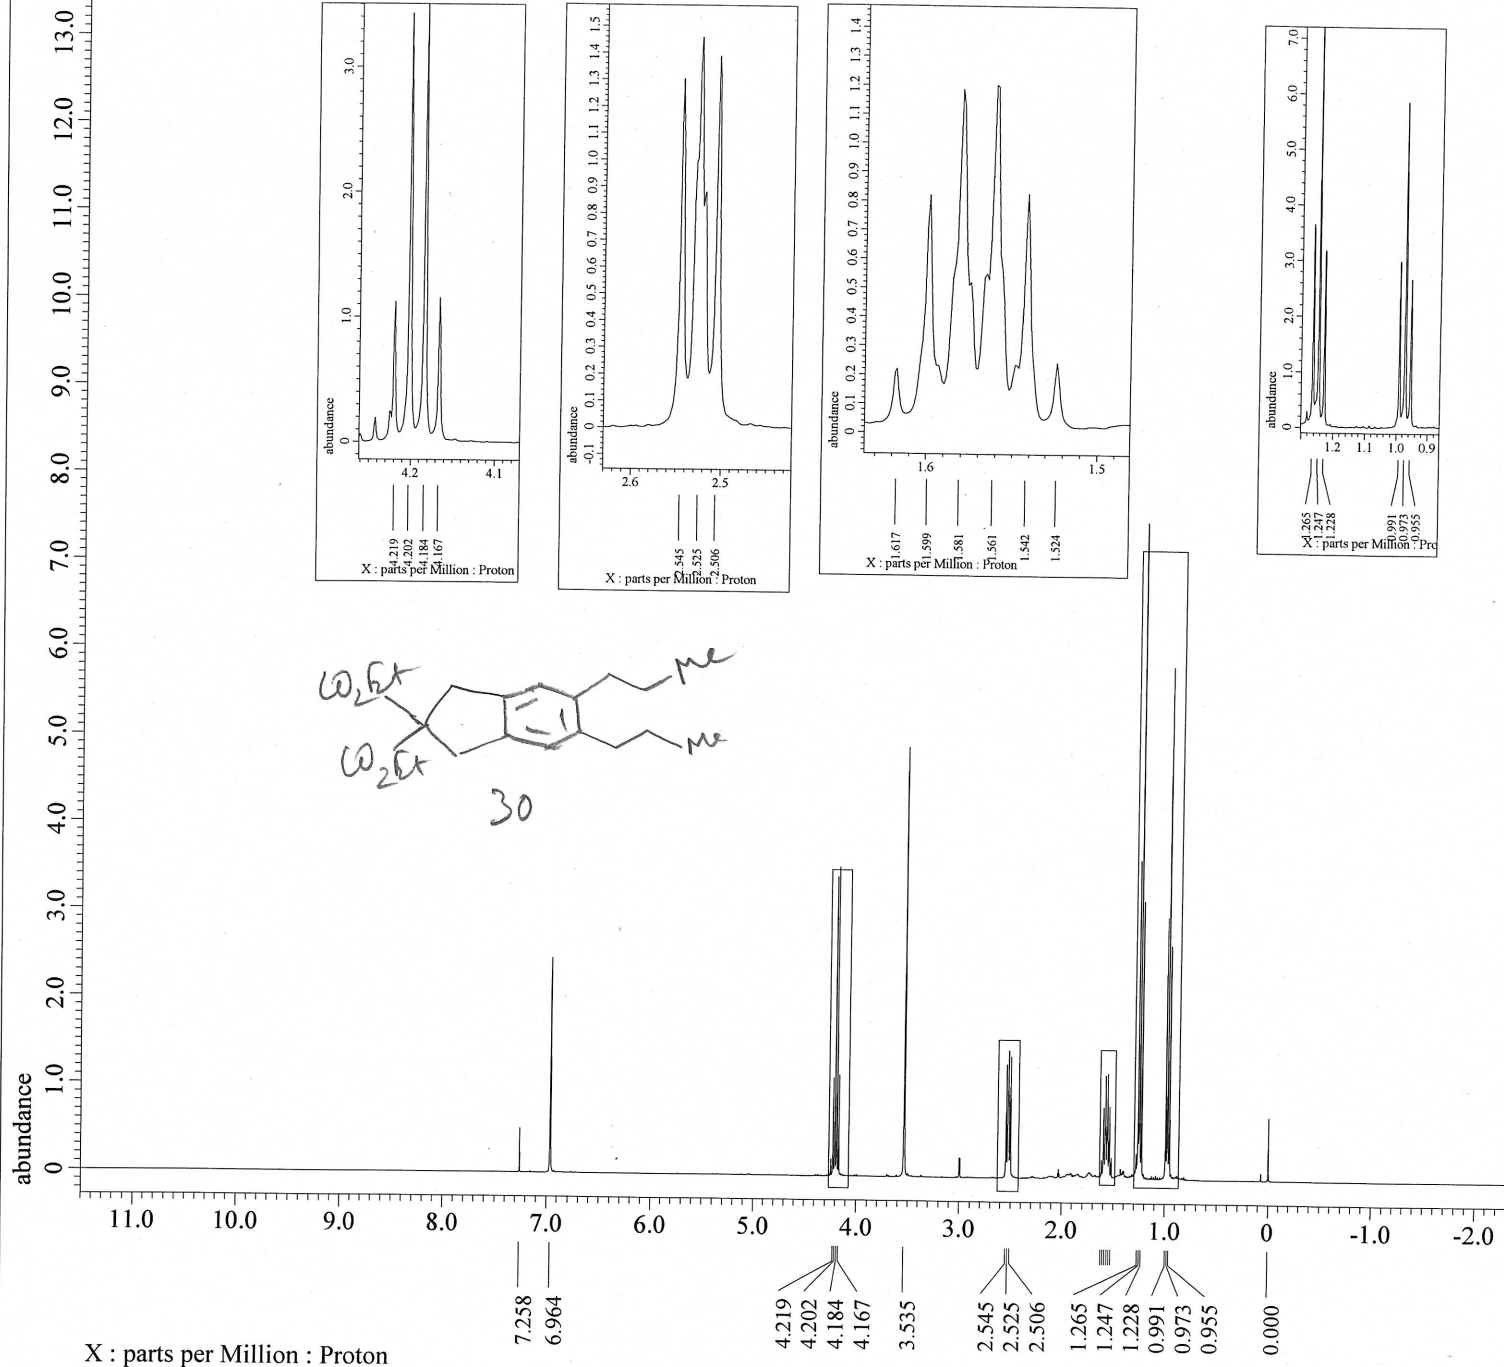

----- PROCESSING PARAMETERS -----

```

dc_balance( 0, FALSE )
sexp( 0.2[Hz], 0.0[s] )
trapezoid( 0[%], 0[%], 80[%], 100[%] )
zerofill( 1 )
fft( 1, TRUE, TRUE )
machinephase
ppm

```

Derived from: Jana233\_Proton-1-1.jdf

Filename = Jana233\_Proton-1-2.jdf  
 Author = element  
 Experiment = proton.jxp  
 Sample\_Id = Jana233  
 Solvent = CHLOROFORM-D  
 Actual\_Start\_Time = 13-JUN-2024 21:03:29  
 Revision\_Time = 12-FEB-2025 11:23:00

Comment = single pulse  
 Data\_Format = 1D COMPLEX  
 Dim\_Size = 13107  
 X\_Domain = Proton  
 Dim\_Title = Proton  
 Dim\_Units = [ppm]  
 Dimensions = X  
 Spectrometer = DELTA2\_NMR

Field\_Strength = 9.4073814[T] (400[MHz])  
 X\_Acq\_Duration = 2.18103808[s]  
 X\_Domain = 1H  
 X\_Freq = 400.53219825[MHz]  
 X\_Offset = 5[ppm]  
 X\_Points = 16384  
 X\_Prescans = 1  
 X\_Resolution = 0.45849727[Hz]  
 X\_Sweep = 7.51201923[kHz]  
 X\_Sweep\_Clippped = 6.00961538[kHz]  
 Irr\_Domain = Proton  
 Irr\_Freq = 400.53219825[MHz]  
 Irr\_Offset = 5[ppm]  
 Tri\_Domain = Proton  
 Tri\_Freq = 400.53219825[MHz]  
 Tri\_Offset = 5[ppm]  
 Clipped = FALSE  
 Scans = 8  
 Total\_Scans = 8

Relaxation\_Delay = 5[s]  
 Recvr\_Gain = 28  
 Temp\_Get = 21.5[dC]  
 X\_90\_Width = 6.7[us]  
 X\_Acq\_Time = 2.18103808[s]  
 X\_Angle = 45[deg]  
 X\_Atn = 0.8[dB]  
 X\_Pulse = 3.35[us]  
 Irr\_Mode = Off  
 Tri\_Mode = Off  
 Dante\_Presat = FALSE  
 Initial\_Wait = 1[s]  
 Repetition\_Time = 7.18103808[s]

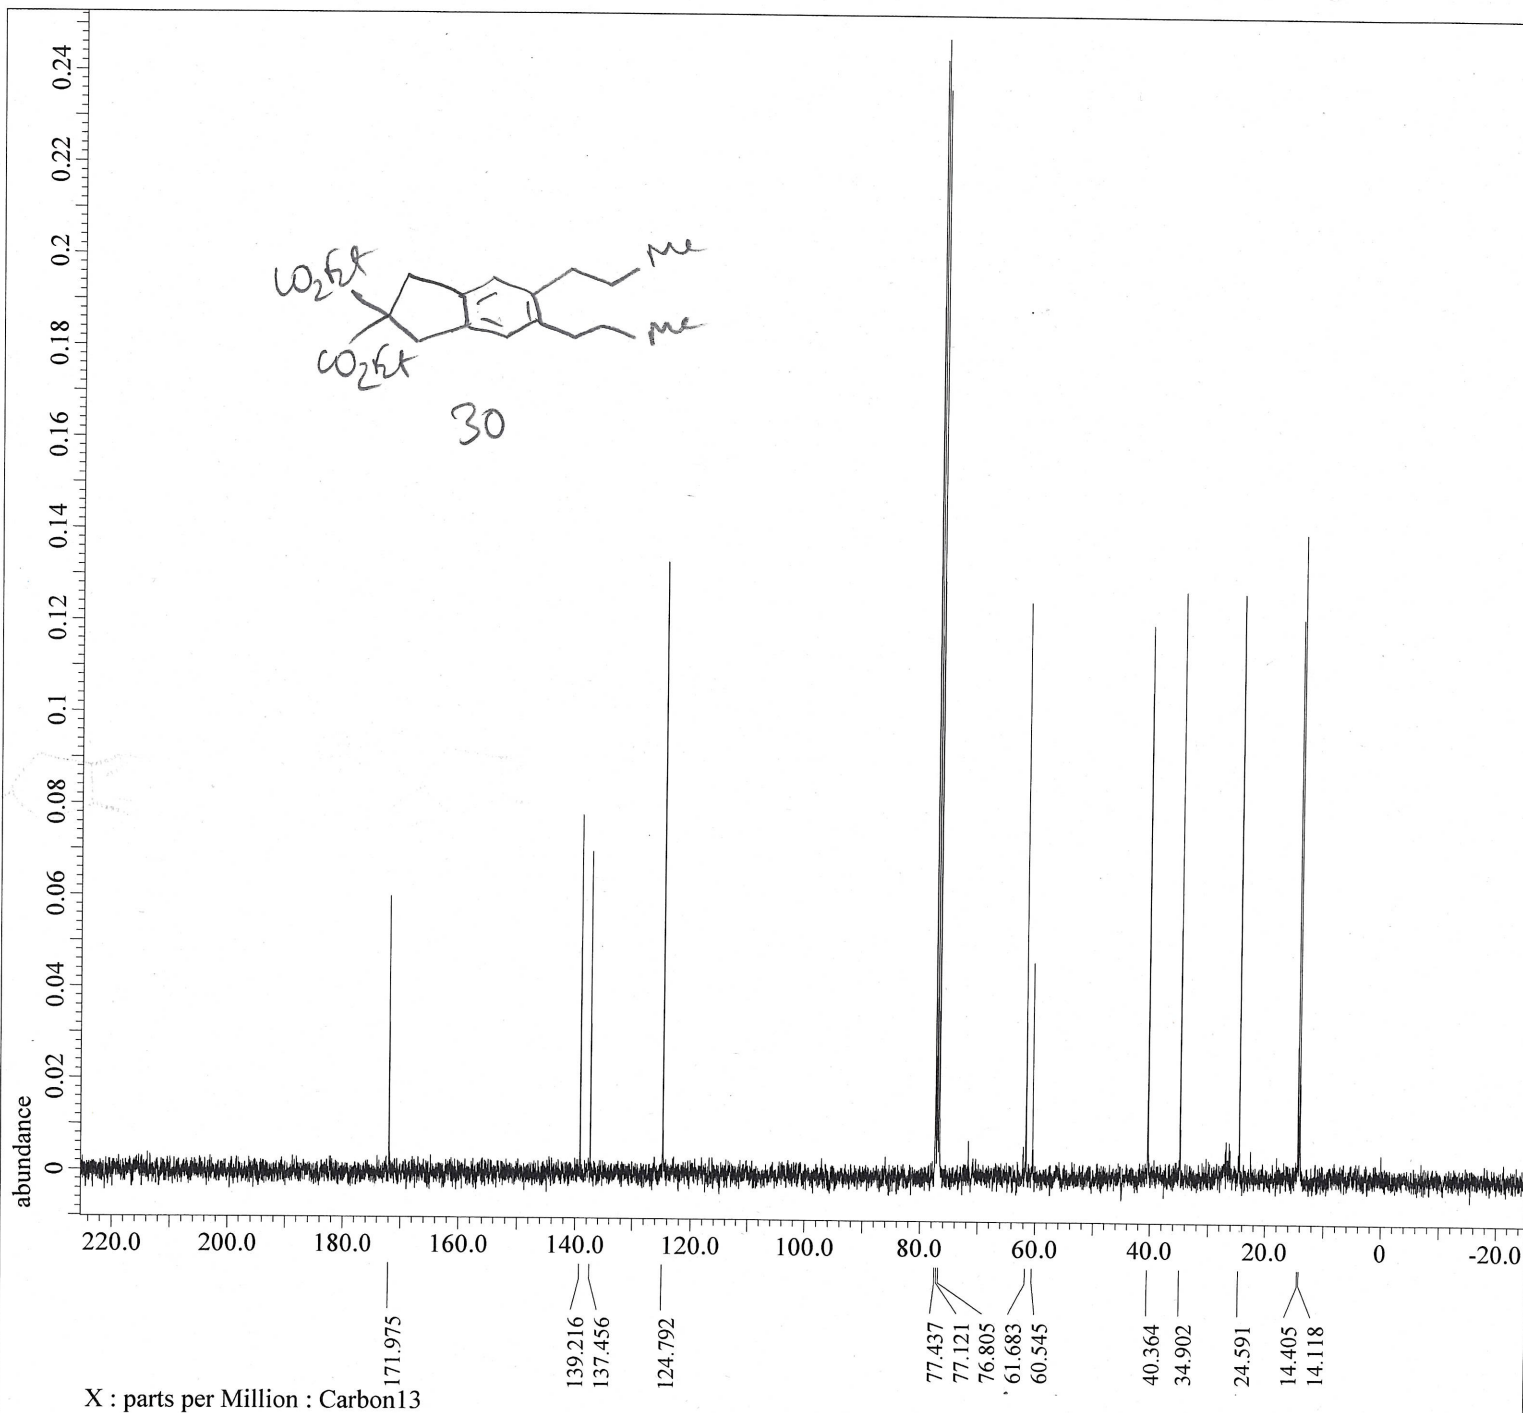

---- PROCESSING PARAMETERS ----  
 dc\_balance( 0, FALSE )  
 sexp( 2.0[Hz], 0.0[s] )  
 trapezoid( 0[%], 0[%], 80[%], 100[%] )  
 zerofill( 1 )  
 fft( 1, TRUE, TRUE )  
 machinephase  
 ppm

Derived from: Jana233\_Carbon-1-1.jdf

Filename = Jana233\_Carbon-1-2.jdf  
 Author = element  
 Experiment = carbon.jxp  
 Sample\_Id = Jana233  
 Solvent = CHLOROFORM-D  
 Actual\_Start\_Time = 13-JUN-2024 21:04:49  
 Revision\_Time = 18-JAN-2025 15:56:22

Comment = single pulse decoupled ga  
 Data Format = 1D COMPLEX  
 Dim\_Size = 26214  
 X\_Domain = Carbon  
 Dim Title = Carbon13  
 Dim Units = [ppm]  
 Dimensions = X  
 Spectrometer = DELTA2\_NMR

Field\_Strength = 9.4073814[T] (400[MHz])  
 X\_Acq\_Duration = 1.03809024[s]  
 X\_Domain = 13C  
 X\_Freq = 100.71389092 [MHz]  
 X\_Offset = 100 [ppm]  
 X\_Points = 32768  
 X\_Prescans = 4  
 X\_Resolution = 0.96330739 [Hz]  
 X\_Sweep = 31.56565657 [kHz]  
 X\_Sweep\_Clippped = 25.25252525 [kHz]  
 Irr\_Domain = Proton  
 Irr\_Freq = 400.53219825 [MHz]  
 Irr\_Offset = 5 [ppm]  
 Clipped = FALSE  
 Scans = 250  
 Total\_Scans = 250

Relaxation\_Delay = 2[s]  
 Recvr\_Gain = 50  
 Temp\_Get = 21.5 [dC]  
 X\_90\_Width = 12.68 [us]  
 X\_Acq\_Time = 1.03809024 [s]  
 X\_Angle = 30 [deg]  
 X\_Atn = 4 [dB]  
 X\_Pulse = 4.22666667 [us]  
 Irr\_Atn\_Dec = 26.45 [dB]  
 Irr\_Atn\_Noe = 26.45 [dB]  
 Irr\_Noise = WALTZ  
 Irr\_Pwidth = 0.115 [ms]  
 Decoupling = TRUE  
 Initial\_Wait = 1 [s]  
 Noe = TRUE  
 Noe\_Time = 2 [s]  
 Repetition\_Time = 3.03809024 [s]



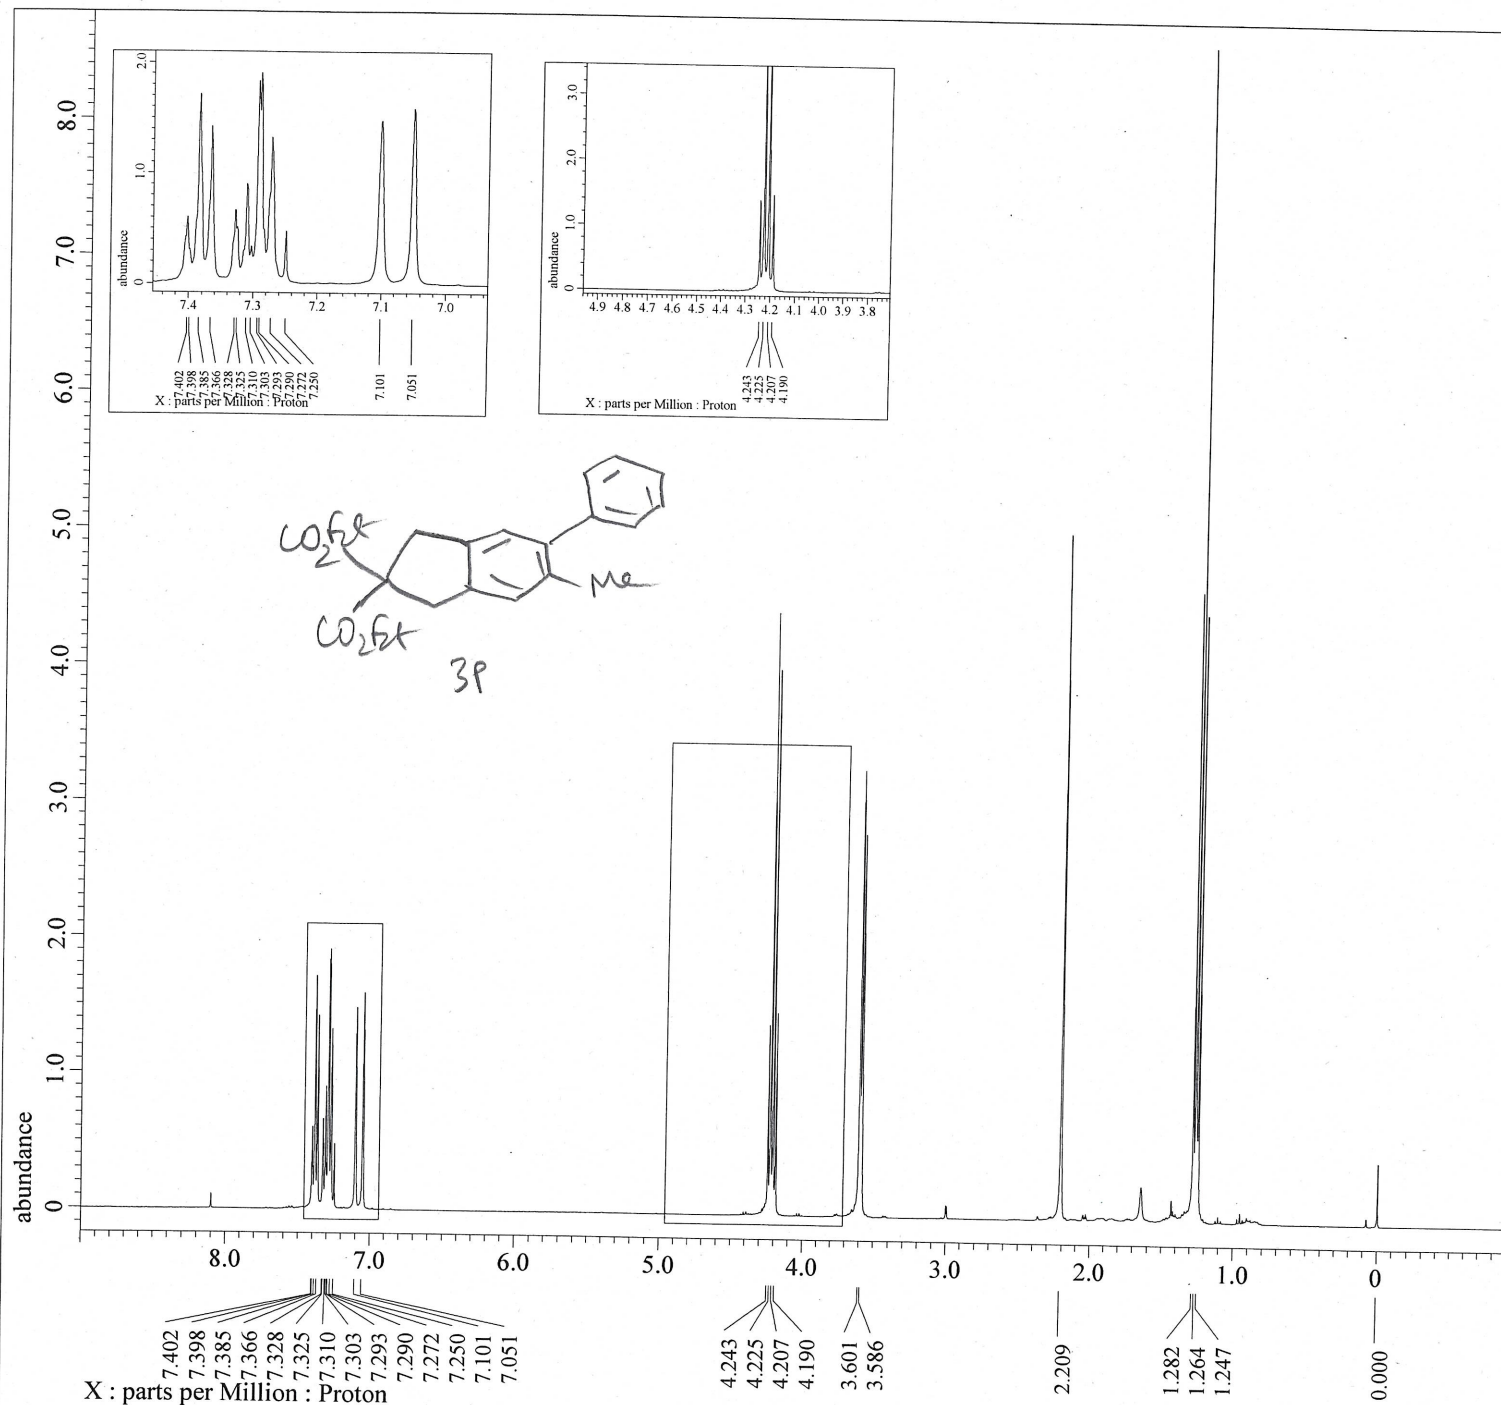

```

---- PROCESSING PARAMETERS ----
dc_balance( 0, FALSE )
sexp( 0.2[Hz], 0.0[s] )
trapezoid( 0[%], 0[%], 80[%], 100[%] )
zerofill( 1 )
fft( 1, TRUE, TRUE )
machinephase
ppm

```

Derived from: Jana232\_Proton-1-1.jdf

```

Filename      = Jana232 Proton-1-2.jdf
Author       = element
Experiment    = proton.jxp
Sample_Id    = Jana232
Solvent      = CHLOROFORM-D
Actual_Start_Time = 12-JUN-2024 14:38:19
Revision_Time  = 15-JUN-2024 10:52:27

```

```

Comment       = single pulse
Data Format    = 1D COMPLEX
Dim_Size      = 13107
X_Domain      = Proton
Dim_Title     = Proton
Dim_Units     = [ppm]
Dimensions    = X
Spectrometer  = DELTA2_NMR

```

```

Field_Strength = 9.4073814[T] (400[MHz])
X_Acq_Duration = 2.18103808[s]
X_Domain       = 1H
X_Freq         = 400.53219825[MHz]
X_Offset       = 5[ppm]
X_Points       = 16384
X_Prescans     = 1
X_Resolution   = 0.45849727[Hz]
X_Sweep        = 7.51201923[kHz]
X_Sweep_Clipped = 6.00961538[kHz]
Irr_Domain     = Proton
Irr_Freq       = 400.53219825[MHz]
Irr_Offset     = 5[ppm]
Tri_Domain     = Proton
Tri_Freq       = 400.53219825[MHz]
Tri_Offset     = 5[ppm]
Clipped        = FALSE
Scans          = 8
Total_Scans    = 8

```

```

Relaxation_Delay = 5[s]
Recvr_Gain       = 30
Temp_Get        = 21.3[dC]
X_90_Width      = 6.7[us]
X_Acq_Time      = 2.18103808[s]
X_Angle         = 45[deg]
X_Atn           = 0.8[dB]
X_Pulse         = 3.35[us]
Irr_Mode        = Off
Tri_Mode        = Off
Dante_Presat    = FALSE
Initial_Wait    = 1[s]
Repetition_Time = 7.18103808[s]

```

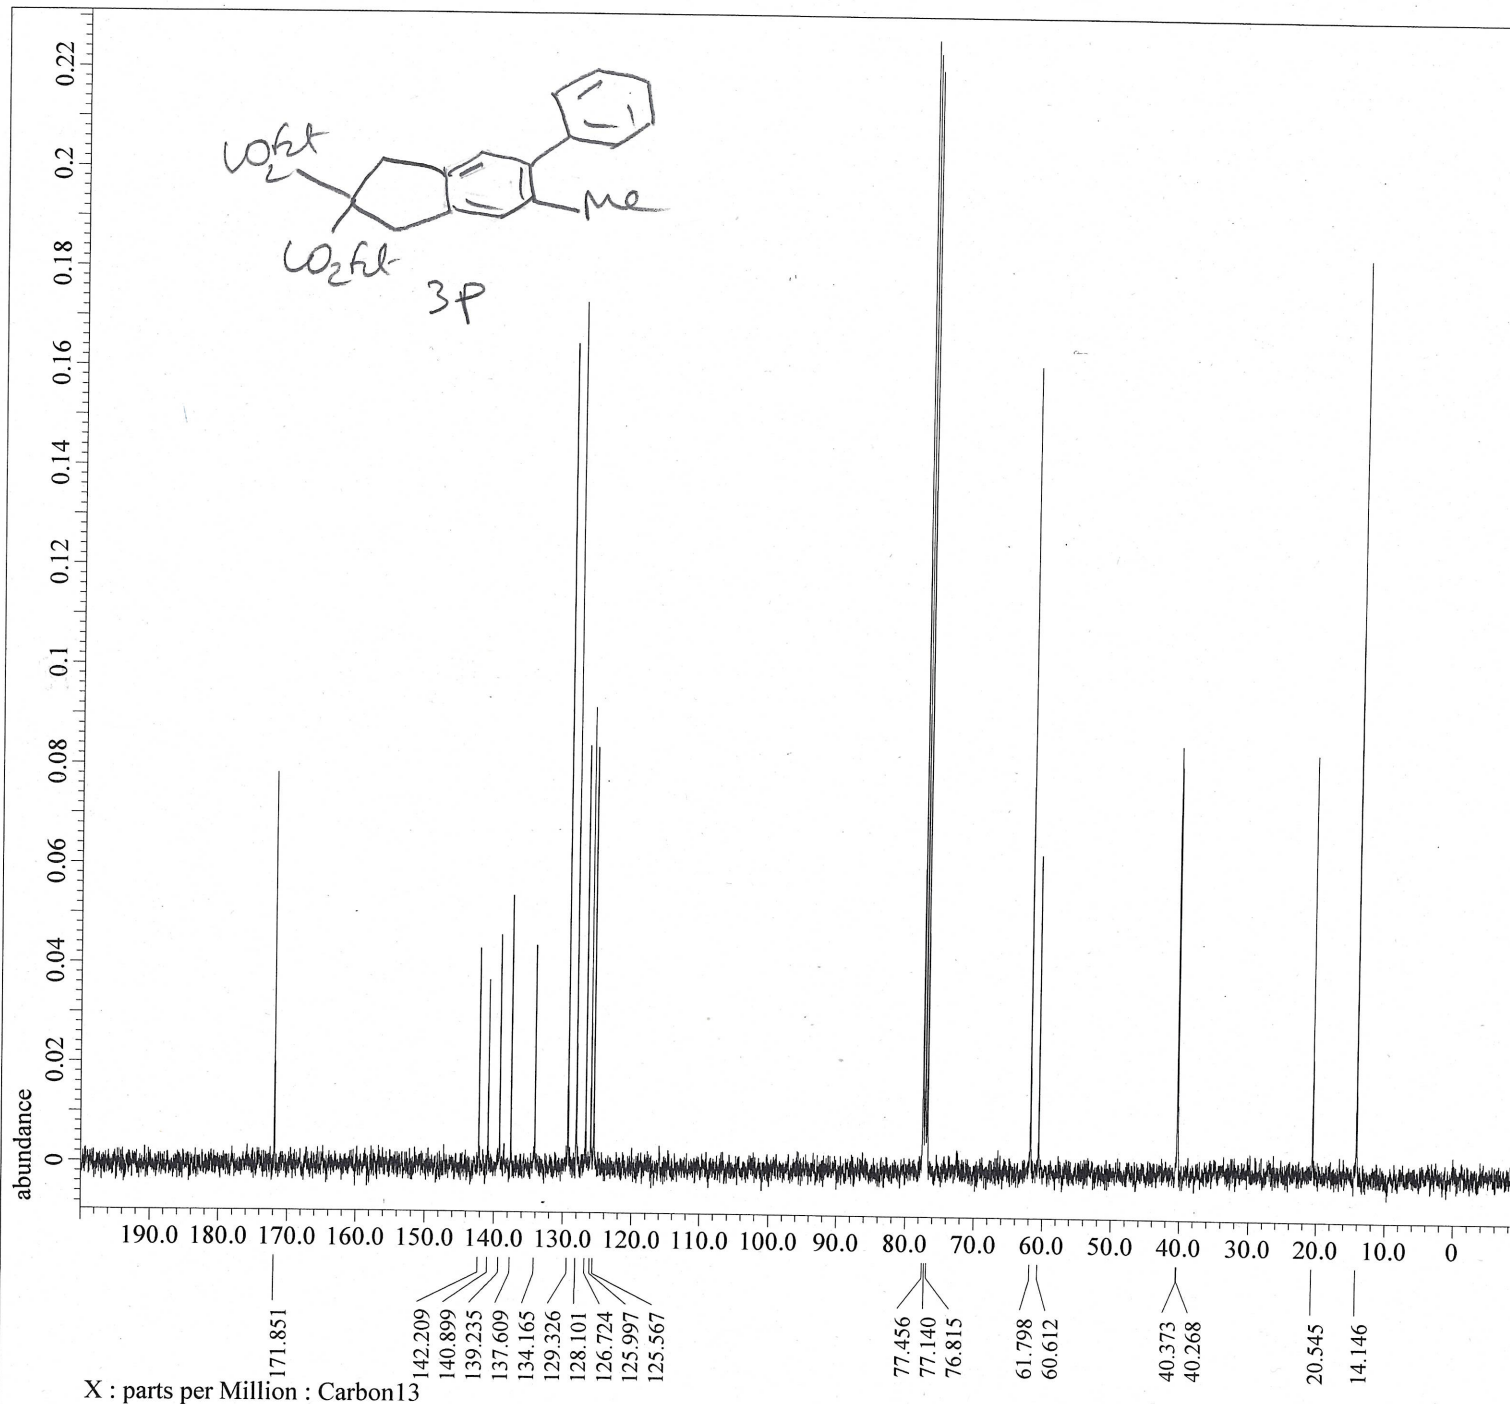

----- PROCESSING PARAMETERS -----

```

dc_balance( 0, FALSE )
sexp( 2.0[Hz], 0.0[s] )
trapezoid( 0[%], 0[%], 80[%], 100[%] )
zerofill( 1 )
fft( 1, TRUE, TRUE )
machinephase
ppm

```

Derived from: Jana232\_Carbon-1-1.jdf

```

Filename      = Jana232_Carbon-1-2.jdf
Author       = element
Experiment    = carbon.jxp
Sample_Id    = Jana232
Solvent      = CHLOROFORM-D
Actual_Start_Time = 12-JUN-2024 14:53:01
Revision_Time  = 15-JUN-2024 11:00:30

Comment      = single pulse decoupled ga
Data_Format  = 1D COMPLEX
Dim_Size     = 26214
X_Domain     = Carbon
Dim_Title    = Carbon13
Dim_Units    = [ppm]
Dimensions   = X
Spectrometer = DELTA2_NMR

Field_Strength = 9.4073814[T] (400[MHz])
X_Acq_Duration = 1.03809024[s]
X_Domain       = 13C
X_Freq         = 100.71389092[MHz]
X_Offset       = 100[ppm]
X_Points       = 32768
X_Prescans     = 4
X_Resolution   = 0.96330739[Hz]
X_Sweep        = 31.56565657[kHz]
X_Sweep_Clipped = 25.25252525[kHz]
Irr_Domain     = Proton
Irr_Freq       = 400.53219825[MHz]
Irr_Offset     = 5[ppm]
Clipped        = FALSE
Scans          = 250
Total_Scans    = 250

Relaxation_Delay = 2[s]
Recvr_Gain       = 50
Temp_Get         = 21.3[dC]
X_90_Width       = 12.68[us]
X_Acq_Time       = 1.03809024[s]
X_Angle          = 30[deg]
X_Atn            = 4[dB]
X_Pulse          = 4.22666667[us]
Irr_Atn_Dec      = 26.45[dB]
Irr_Atn_Noe      = 26.45[dB]
Irr_Noise        = WALTZ
Irr_Pwidth       = 0.115[ms]
Decoupling       = TRUE
Initial_Wait     = 1[s]
Noe              = TRUE
Noe_Time         = 2[s]
Repetition_Time  = 3.03809024[s]

```

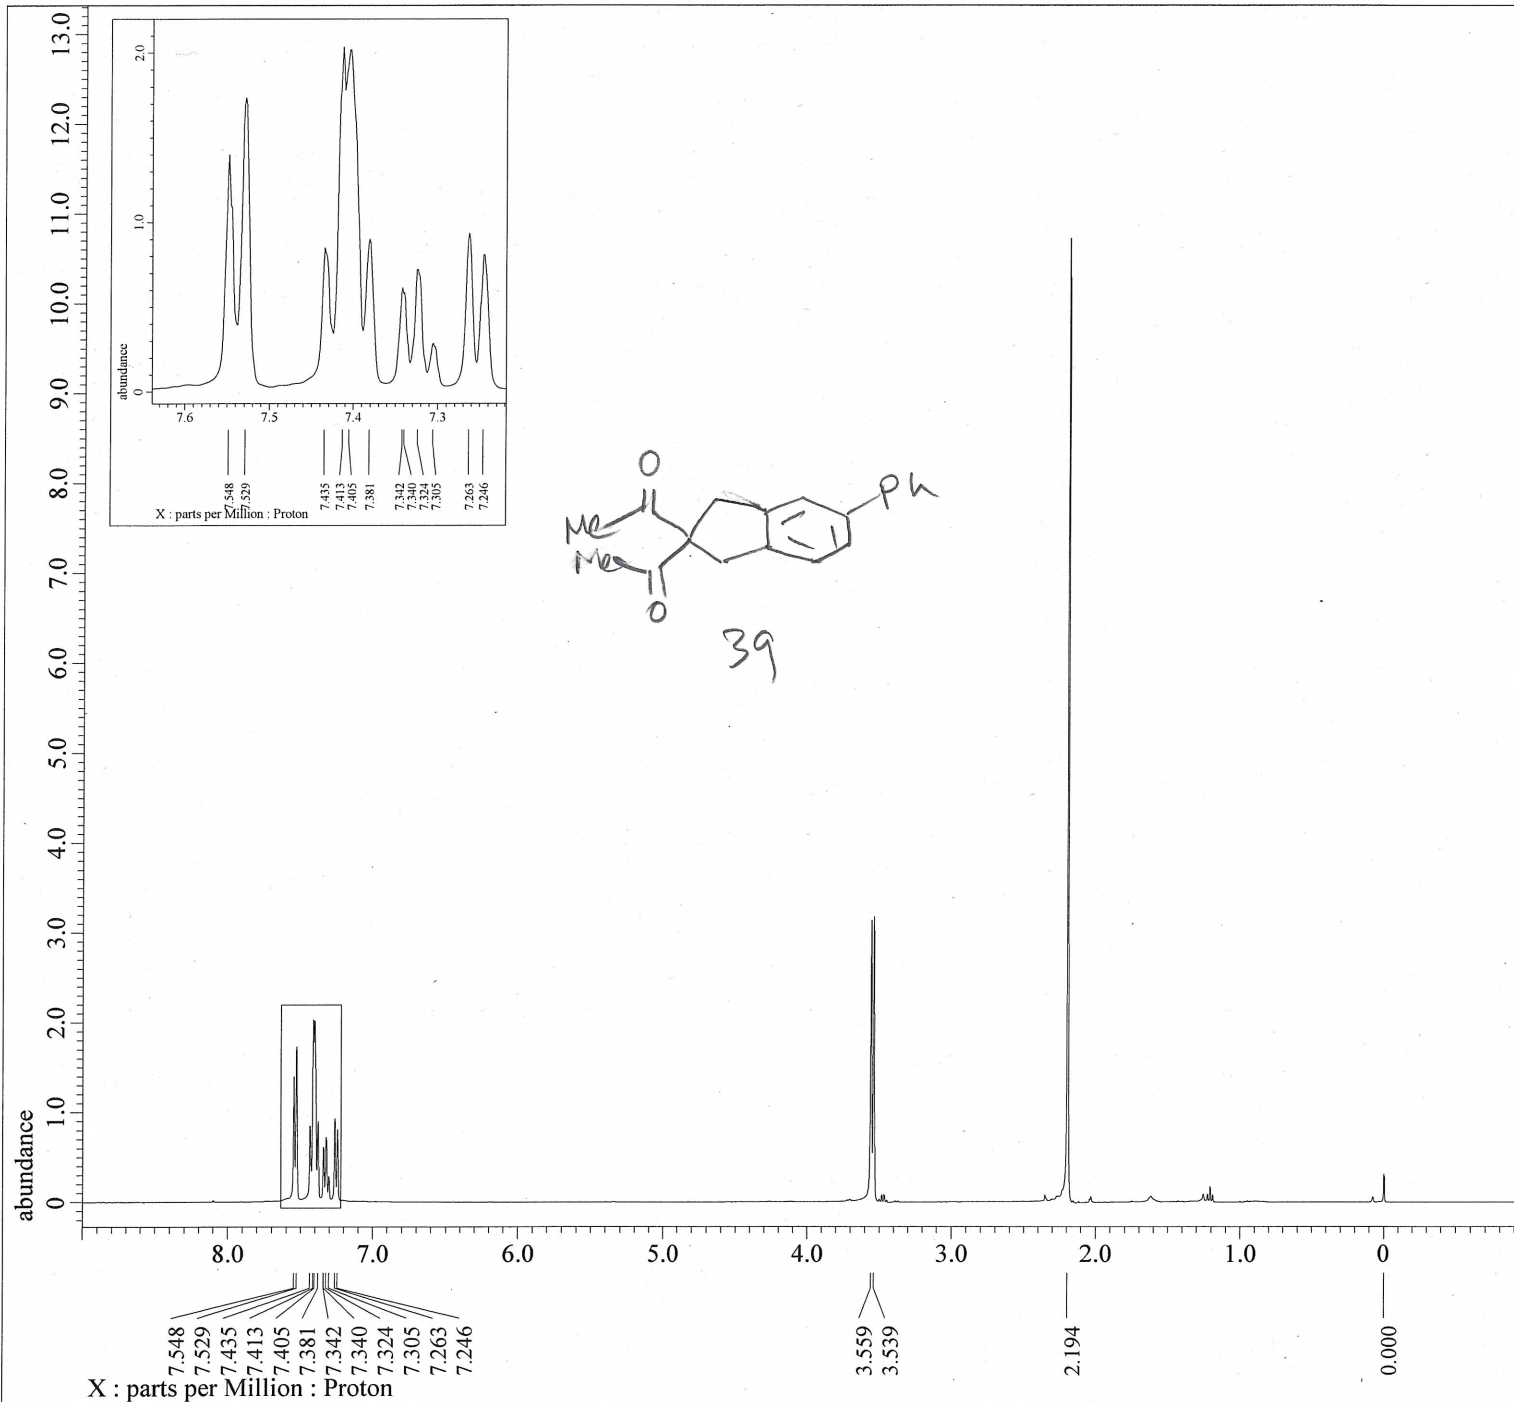

----- PROCESSING PARAMETERS -----  
 dc\_balance( 0, FALSE )  
 sexp( 0.2[Hz], 0.0[s] )  
 trapezoid( 0[%], 0[%], 80[%], 100[%] )  
 zerofill( 1 )  
 fft( 1, TRUE, TRUE )  
 machinephase  
 ppm

Derived from: Jana236\_Proton-1-1.jdf

Filename = Jana236\_Proton-1-2.jdf  
 Author = element  
 Experiment = proton.jxp  
 Sample Id = Jana236  
 Solvent = CHLOROFORM-D  
 Actual\_Start\_Time = 15-JUN-2024 12:44:45  
 Revision\_Time = 15-JUN-2024 13:02:46

Comment = single\_pulse  
 Data\_Format = 1D\_COMPLEX  
 Dim\_Size = 13107  
 X\_Domain = Proton  
 Dim\_Title = Proton  
 Dim\_Units = [ppm]  
 Dimensions = X  
 Spectrometer = DELTA2\_NMR

Field\_Strength = 9.4073814[T] (400[MHz])  
 X\_Acq\_Duration = 2.18103808[s]  
 X\_Domain = 1H  
 X\_Freq = 400.53219825[MHz]  
 X\_Offset = 5[ppm]  
 X\_Points = 16384  
 X\_Prescans = 1  
 X\_Resolution = 0.45849727[Hz]  
 X\_Sweep = 7.51201923[kHz]  
 X\_Sweep\_Clipped = 6.00961538[kHz]  
 Irr\_Domain = Proton  
 Irr\_Freq = 400.53219825[MHz]  
 Irr\_Offset = 5[ppm]  
 Tri\_Domain = Proton  
 Tri\_Freq = 400.53219825[MHz]  
 Tri\_Offset = 5[ppm]  
 Clipped = FALSE  
 Scans = 8  
 Total\_Scans = 8

Relaxation\_Delay = 5[s]  
 Recvr\_Gain = 30  
 Temp\_Get = 18.8[dC]  
 X\_90\_Width = 6.7[us]  
 X\_Acq\_Time = 2.18103808[s]  
 X\_Angle = 45[deg]  
 X\_Atn = 0.8[dB]  
 X\_Pulse = 3.35[us]  
 Irr\_Mode = Off  
 Tri\_Mode = Off  
 Dante\_Presat = FALSE  
 Initial\_Wait = 1[s]  
 Repetition\_Time = 7.18103808[s]



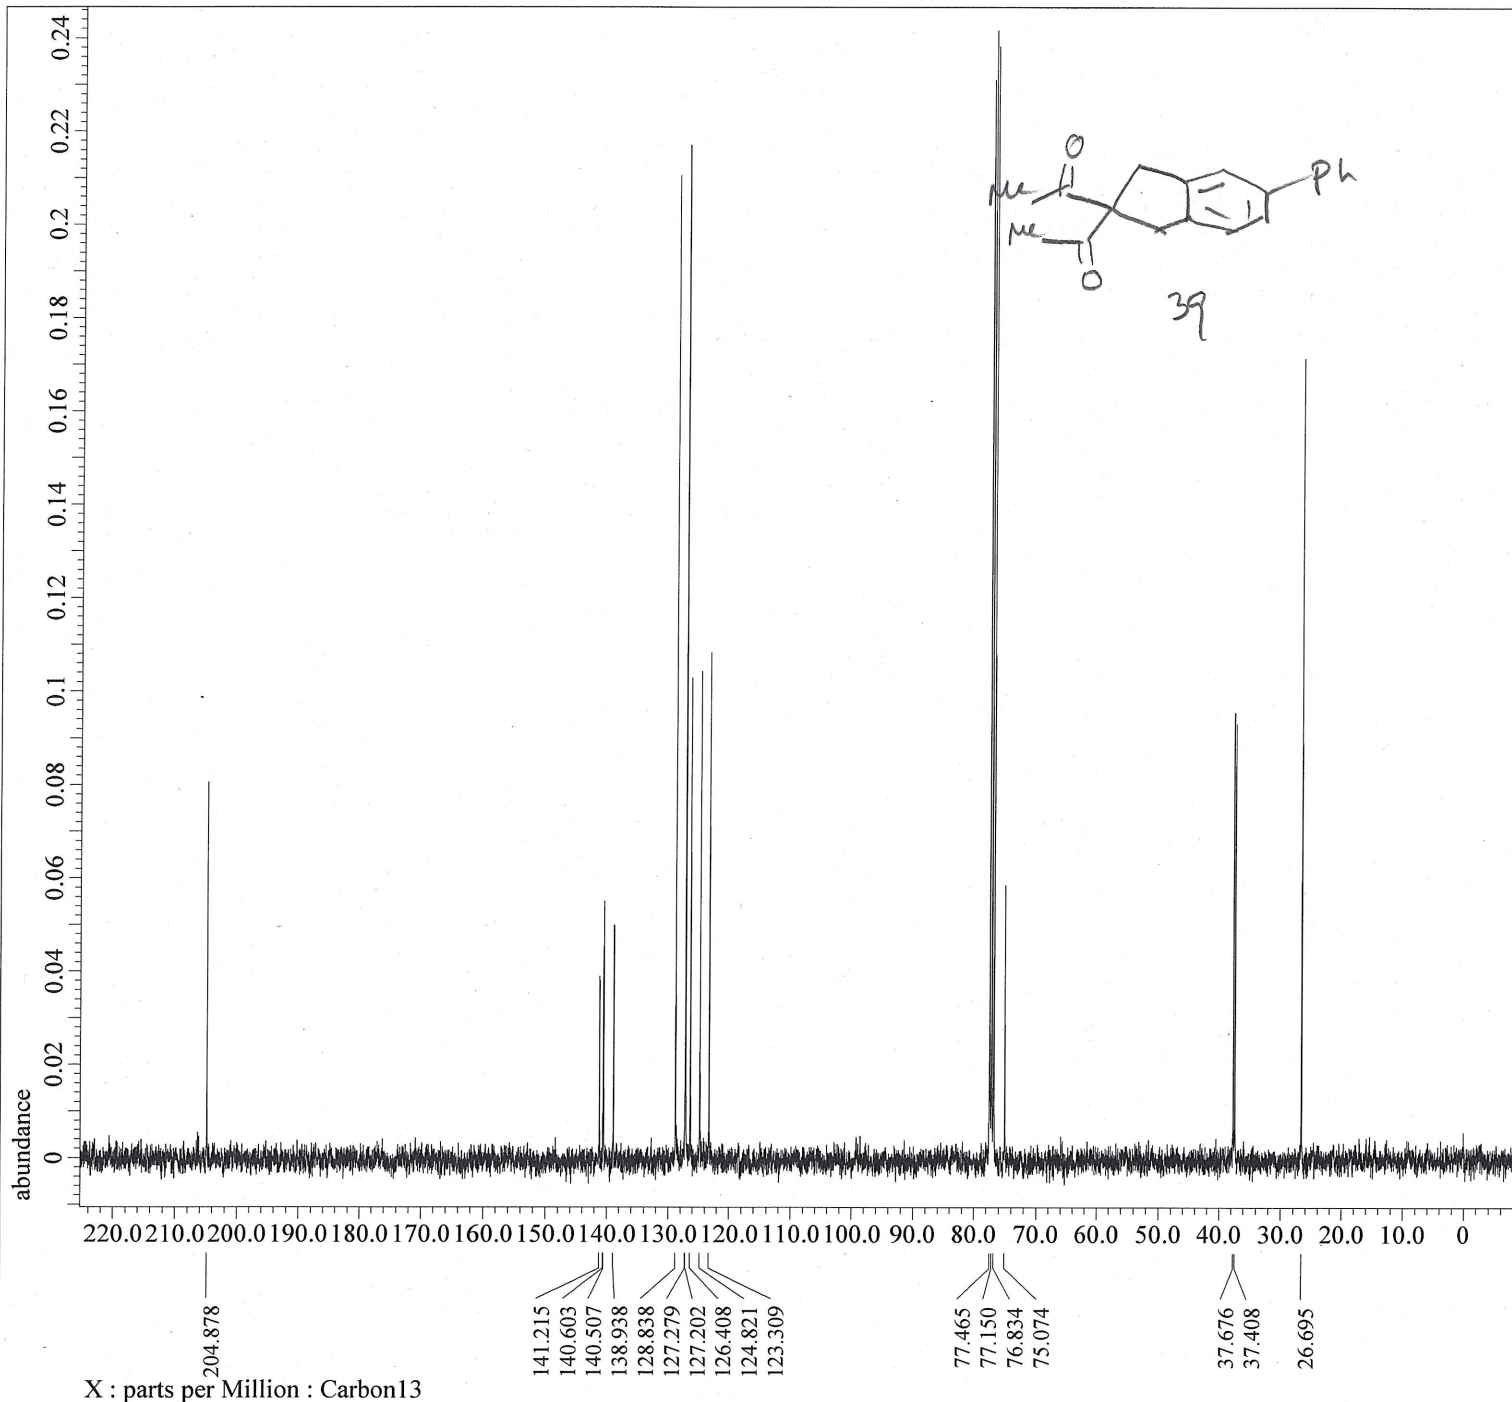

----- PROCESSING PARAMETERS -----  
dc\_balance( 0, FALSE )  
sexp( 2.0[Hz], 0.0[s] )  
trapezoid( 0[%], 0[%], 80[%], 100[%] )  
zerofill( 1 )  
fft( 1, TRUE, TRUE )  
machinephase  
ppm

Derived from: Jana236\_Carbon-1-1.jdf

Filename = Jana236\_Carbon-1-2.jdf  
Author = element  
Experiment = carbon.jxp  
Sample\_Id = Jana236  
Solvent = CHLOROFORM-D  
Actual\_Start\_Time = 15-JUN-2024 12:46:05  
Revision\_Time = 15-JUN-2024 12:58:20

Comment = single pulse decoupled ga  
Data\_Format = 1D COMPLEX  
Dim\_Size = 26214  
X\_Domain = Carbon  
Dim\_Title = Carbon13  
Dim\_Units = [ppm]  
Dimensions = X  
Spectrometer = DELTA2\_NMR

Field\_Strength = 9.4073814[T] (400[MHz])  
X\_Acq\_Duration = 1.03809024[s]  
X\_Domain = 13C  
X\_Freq = 100.71389092[MHz]  
X\_Offset = 100[ppm]  
X\_Points = 32768  
X\_Prescans = 4  
X\_Resolution = 0.96330739[Hz]  
X\_Sweep = 31.56565657[kHz]  
X\_Sweep\_Clipped = 25.25252525[kHz]  
Irr\_Domain = Proton  
Irr\_Freq = 400.53219825[MHz]  
Irr\_Offset = 5[ppm]  
Clipped = FALSE  
Scans = 200  
Total\_Scans = 200

Relaxation\_Delay = 2[s]  
Recvr\_Gain = 50  
Temp\_Get = 18.4[dC]  
X\_90\_Width = 12.68[us]  
X\_Acq\_Time = 1.03809024[s]  
X\_Angle = 30[deg]  
X\_Atn = 4[dB]  
X\_Pulse = 4.22666667[us]  
Irr\_Atn\_Dec = 26.45[dB]  
Irr\_Atn\_Noe = 26.45[dB]  
Irr\_Noise = WALTZ  
Irr\_Pwidth = 0.115[ms]  
Decoupling = TRUE  
Initial\_Wait = 1[s]  
Noe = TRUE  
Noe\_Time = 2[s]  
Repetition\_Time = 3.03809024[s]

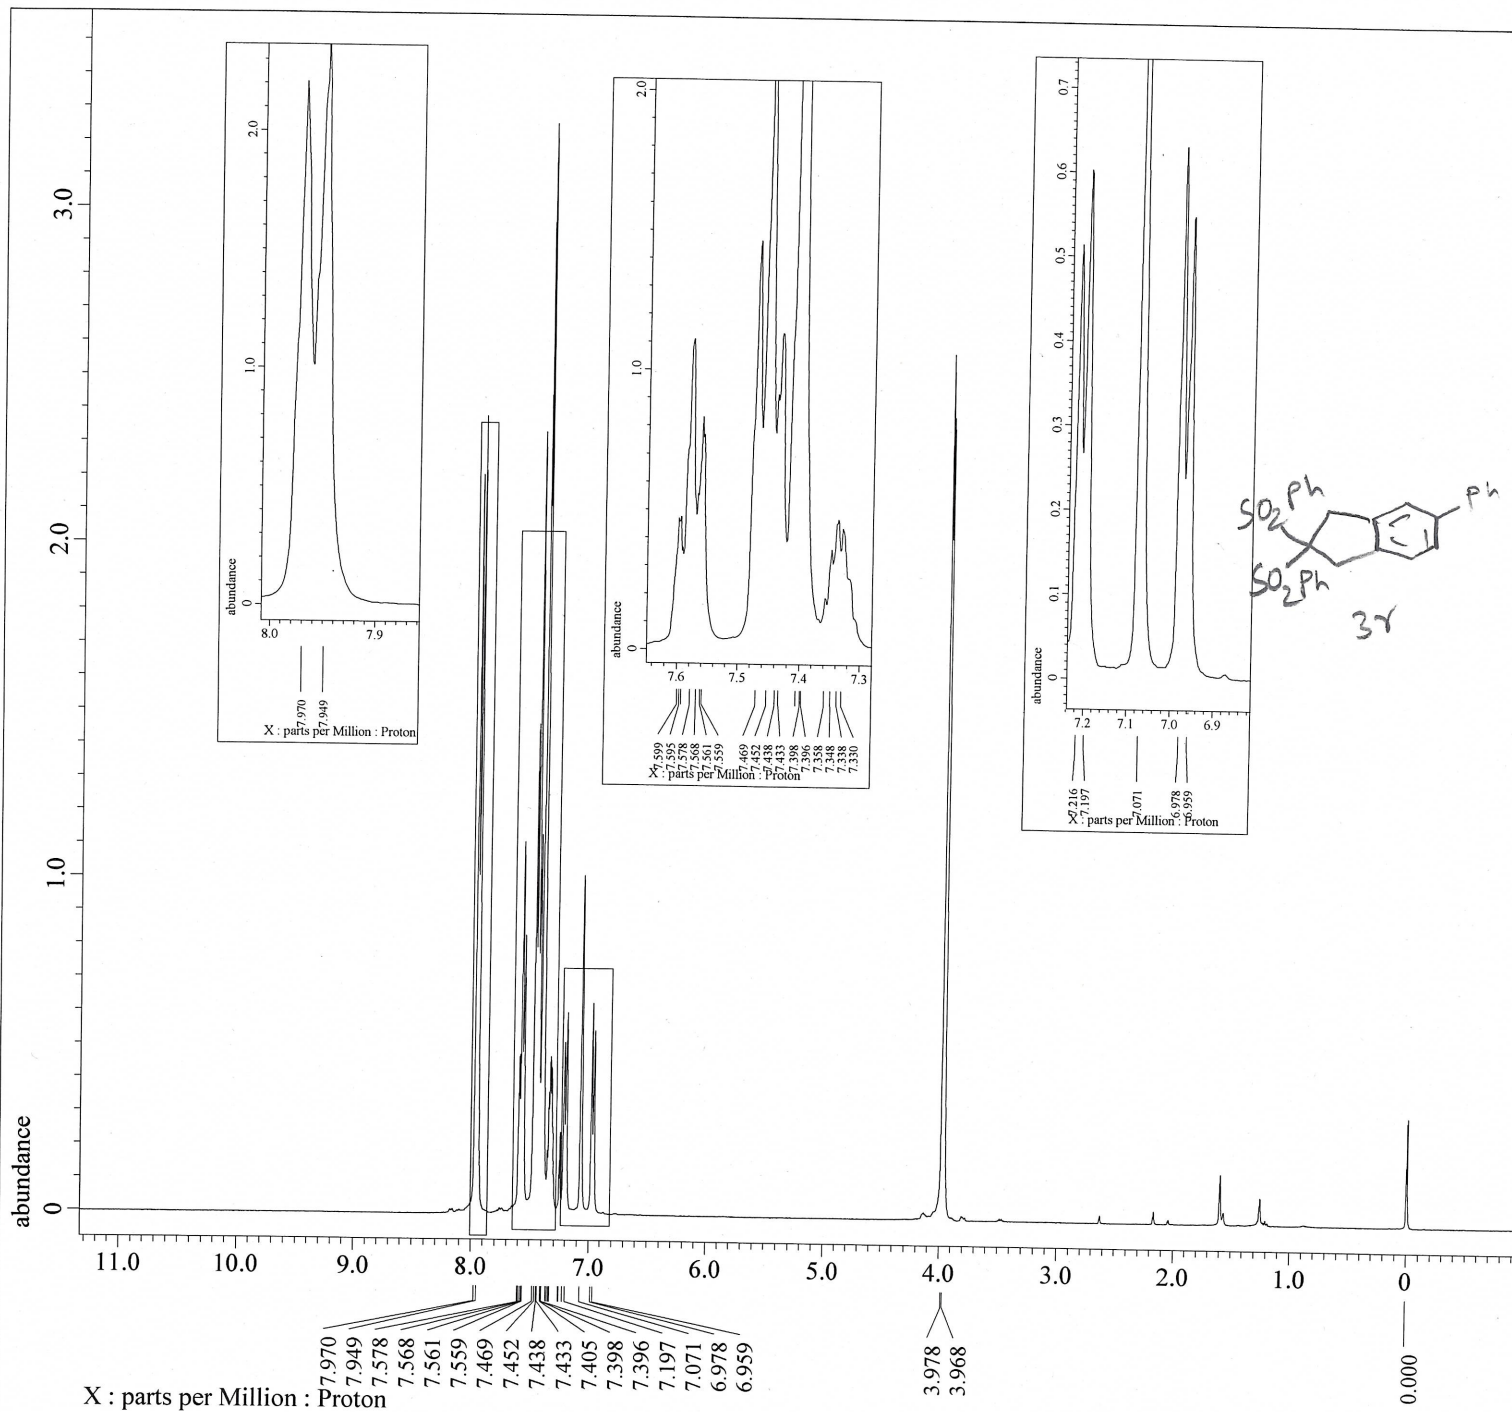

```

---- PROCESSING PARAMETERS ----
dc_balance( 0, FALSE )
sexp( 0.2[Hz], 0.0[s] )
trapezoid( 0[%], 0[%], 80[%], 100[%] )
zerofill( 1 )
fft( 1, TRUE, TRUE )
machinephase
ppm

```

Derived from: Jana259\_Proton-1-1.jdf

```

Filename      = Jana259_Proton-1-2.jdf
Author       = element
Experiment    = proton.jxp
Sample_Id    = Jana259
Solvent      = CHLOROFORM-D
Actual_Start_Time = 29-JUN-2024 18:13:14
Revision_Time = 12-FEB-2025 11:39:02

```

```

Comment       = single pulse
Data Format    = 1D COMPLEX
Dim Size      = 13107
X Domain      = Proton
Dim Title     = Proton
Dim Units     = [ppm]
Dimensions    = X
Spectrometer  = DELTA2_NMR

```

```

Field_Strength = 9.4073814[T] (400[MHz])
X_Acq_Duration = 2.18103808[s]
X_Domain       = 1H
X_Freq         = 400.53219825[MHz]
X_Offset       = 5[ppm]
X_Points       = 16384
X_Prescans     = 1
X_Resolution   = 0.45849727[Hz]
X_Sweep        = 7.51201923[kHz]
X_Sweep_Clippped = 6.00961538[kHz]
Irr_Domain     = Proton
Irr_Freq       = 400.53219825[MHz]
Irr_Offset     = 5[ppm]
Tri_Domain     = Proton
Tri_Freq       = 400.53219825[MHz]
Tri_Offset     = 5[ppm]
Clipped        = FALSE
Scans          = 8
Total_Scans    = 8

```

```

Relaxation_Delay = 5[s]
Recvr_Gain       = 40
Temp_Get         = 20.4[dC]
X_90_Width       = 6.7[us]
X_Acq_Time       = 2.18103808[s]
X_Angle          = 45[deg]
X_Atn            = 0.8[dB]
X_Pulse          = 3.35[us]
Irr_Mode         = Off
Tri_Mode         = Off
Dante_Presat     = FALSE
Initial_Wait     = 1[s]
Repetition_Time  = 7.18103808[s]

```

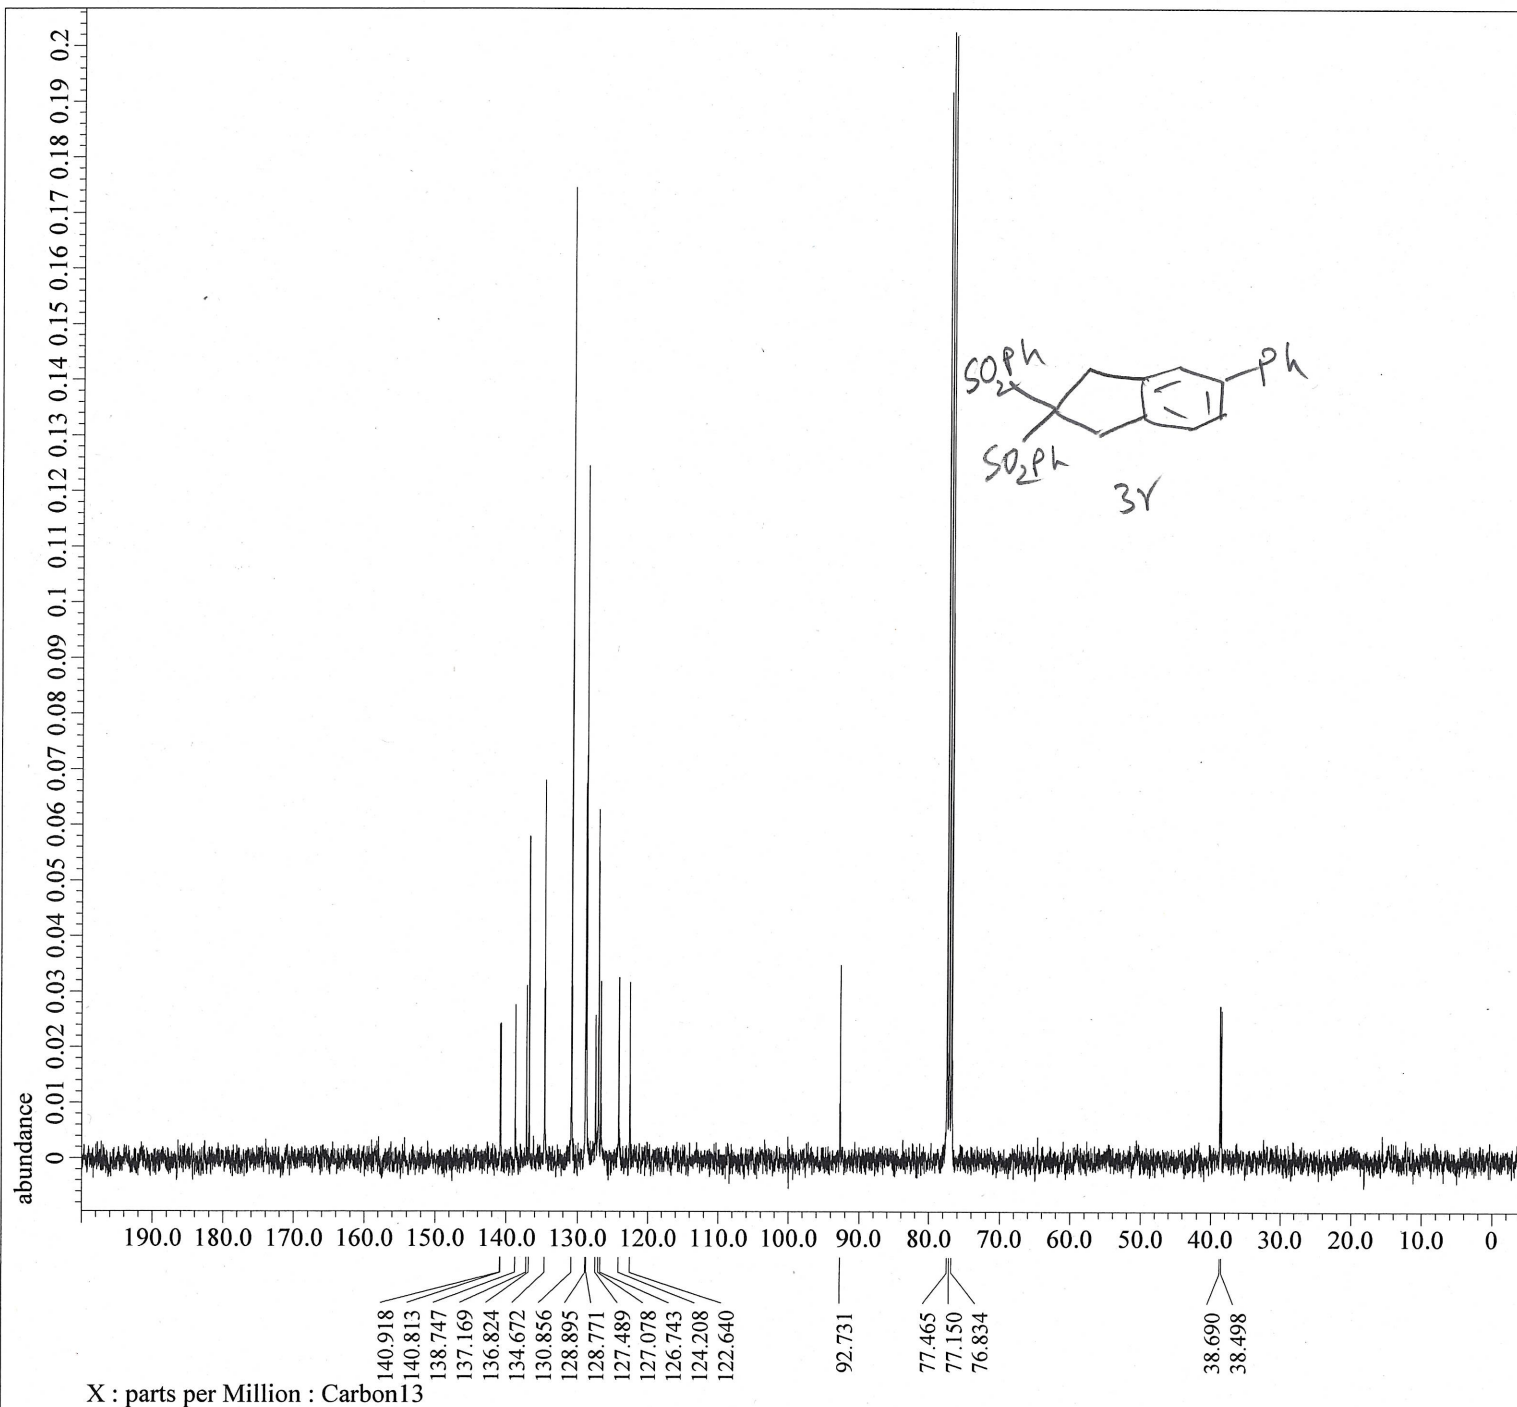

----- PROCESSING PARAMETERS -----  
 dc\_balance( 0, FALSE )  
 sexp( 2.0[Hz], 0.0[s] )  
 trapezoid( 0[%], 0[%], 80[%], 100[%] )  
 zerofill( 1 )  
 fft( 1, TRUE, TRUE )  
 machinephase  
 ppm

Derived from: Jana259\_Carbon-1-1.jdf

Filename = Jana259\_Carbon-1-2.jdf  
 Author = element  
 Experiment = carbon.jxp  
 Sample\_Id = Jana259  
 Solvent = CHLOROFORM-D  
 Actual\_Start\_Time = 29-JUN-2024 18:14:34  
 Revision\_Time = 16-OCT-2024 18:43:05

Comment = single pulse decoupled ga  
 Data\_Format = 1D COMPLEX  
 Dim\_Size = 26214  
 X\_Domain = Carbon  
 Dim\_Title = Carbon13  
 Dim\_Units = [ppm]  
 Dimensions = X  
 Spectrometer = DELTA2\_NMR

Field\_Strength = 9.4073814[T] (400[MHz])  
 X\_Acq\_Duration = 1.03809024[s]  
 X\_Domain = 13C  
 X\_Freq = 100.71389092[MHz]  
 X\_Offset = 100[ppm]  
 X\_Points = 32768  
 X\_Prescans = 4  
 X\_Resolution = 0.96330739[Hz]  
 X\_Sweep = 31.56565657[kHz]  
 X\_Sweep\_Clipped = 25.25252525[kHz]  
 Irr\_Domain = Proton  
 Irr\_Freq = 400.53219825[MHz]  
 Irr\_Offset = 5[ppm]  
 Clipped = FALSE  
 Scans = 250  
 Total\_Scans = 250

Relaxation\_Delay = 2[s]  
 Recvr\_Gain = 50  
 Temp\_Get = 20.3[dC]  
 X\_90\_Width = 12.68[us]  
 X\_Acq\_Time = 1.03809024[s]  
 X\_Angle = 30[deg]  
 X\_Atn = 4[dB]  
 X\_Pulse = 4.22666667[us]  
 Irr\_Atn\_Dec = 26.45[dB]  
 Irr\_Atn\_Noe = 26.45[dB]  
 Irr\_Noise = WALTZ  
 Irr\_Pwidth = 0.115[ms]  
 Decoupling = TRUE  
 Initial\_Wait = 1[s]  
 Noe = TRUE  
 Noe\_Time = 2[s]  
 Repetition\_Time = 3.03809024[s]



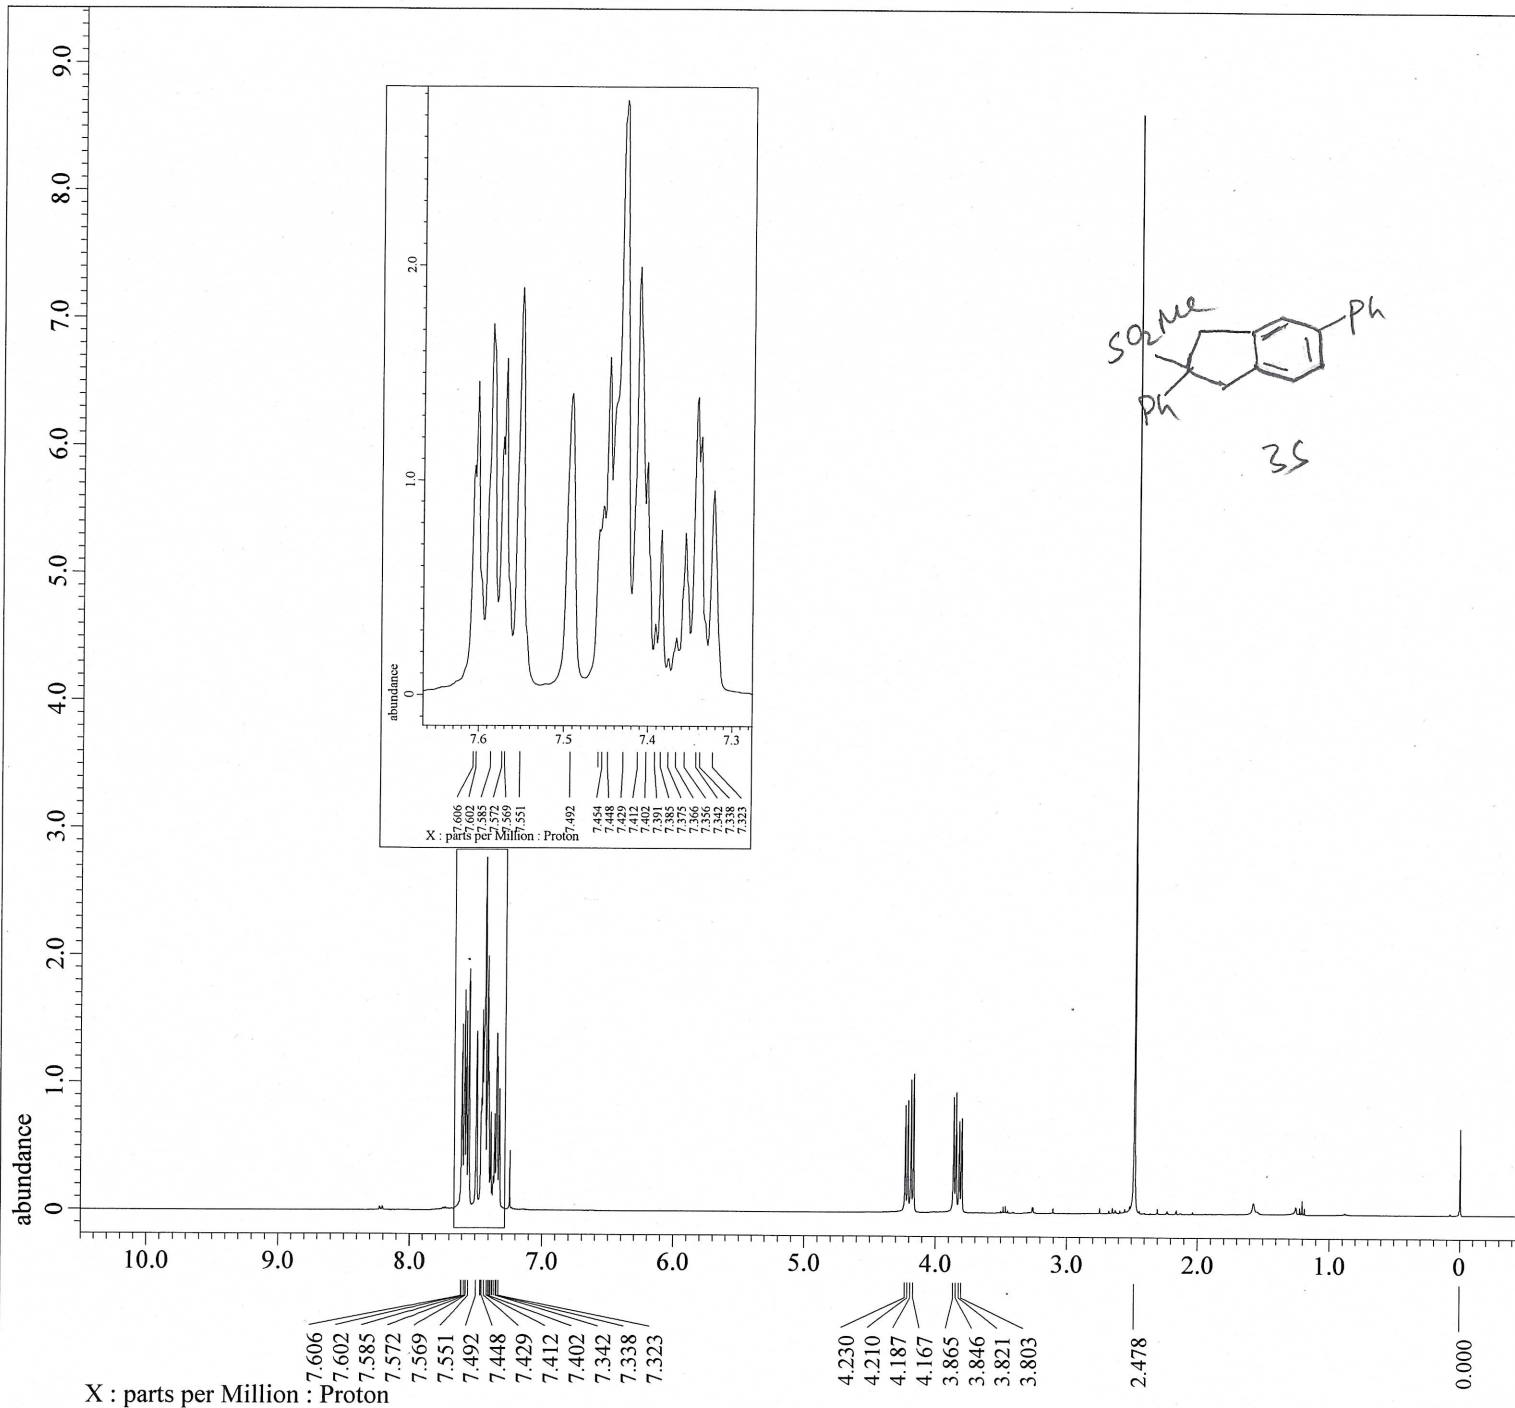

----- PROCESSING PARAMETERS -----  
 dc\_balance( 0, FALSE )  
 secp( 0.2[Hz], 0.0[s] )  
 trapezoid( 0[%], 0[%], 80[%], 100[%] )  
 zerofill( 1 )  
 fft( 1, TRUE, TRUE )  
 machinephase  
 ppm

Derived from: Jana260p\_Proton-1-1.jdf

Filename = Jana260p\_Proton-1-2.jdf  
 Author = element  
 Experiment = proton.jxp  
 Sample Id = Jana260p  
 Solvent = CHLOROFORM-D  
 Actual\_Start\_Time = 29-JUN-2024 17:13:37  
 Revision\_Time = 12-FEB-2025 12:04:39

Comment = single\_pulse  
 Data\_Format = 1D\_COMPLEX  
 Dim\_Size = 13107  
 X\_Domain = Proton  
 Dim\_Title = Proton  
 Dim\_Units = [ppm]  
 Dimensions = X  
 Spectrometer = DELTA2\_NMR

Field\_Strength = 9.4073814[T] (400[MHz])  
 X\_Acq\_Duration = 2.18103808[s]  
 X\_Domain = 1H  
 X\_Freq = 400.53219825[MHz]  
 X\_Offset = 5[ppm]  
 X\_Points = 16384  
 X\_Prescans = 1  
 X\_Resolution = 0.45849727[Hz]  
 X\_Sweep = 7.51201923[kHz]  
 X\_Sweep\_Clipped = 6.00961538[kHz]  
 Irr\_Domain = Proton  
 Irr\_Freq = 400.53219825[MHz]  
 Irr\_Offset = 5[ppm]  
 Tri\_Domain = Proton  
 Tri\_Freq = 400.53219825[MHz]  
 Tri\_Offset = 5[ppm]  
 Clipped = FALSE  
 Scans = 8  
 Total\_Scans = 8

Relaxation\_Delay = 5[s]  
 Recvr\_Gain = 36  
 Temp\_Get = 20.7[dC]  
 X\_90\_Width = 6.7[us]  
 X\_Acq\_Time = 2.18103808[s]  
 X\_Angle = 45[deg]  
 X\_Atn = 0.8[dB]  
 X\_Pulse = 3.35[us]  
 Irr\_Mode = Off  
 Tri\_Mode = Off  
 Dante\_Presat = FALSE  
 Initial\_Wait = 1[s]  
 Repetition\_Time = 7.18103808[s]

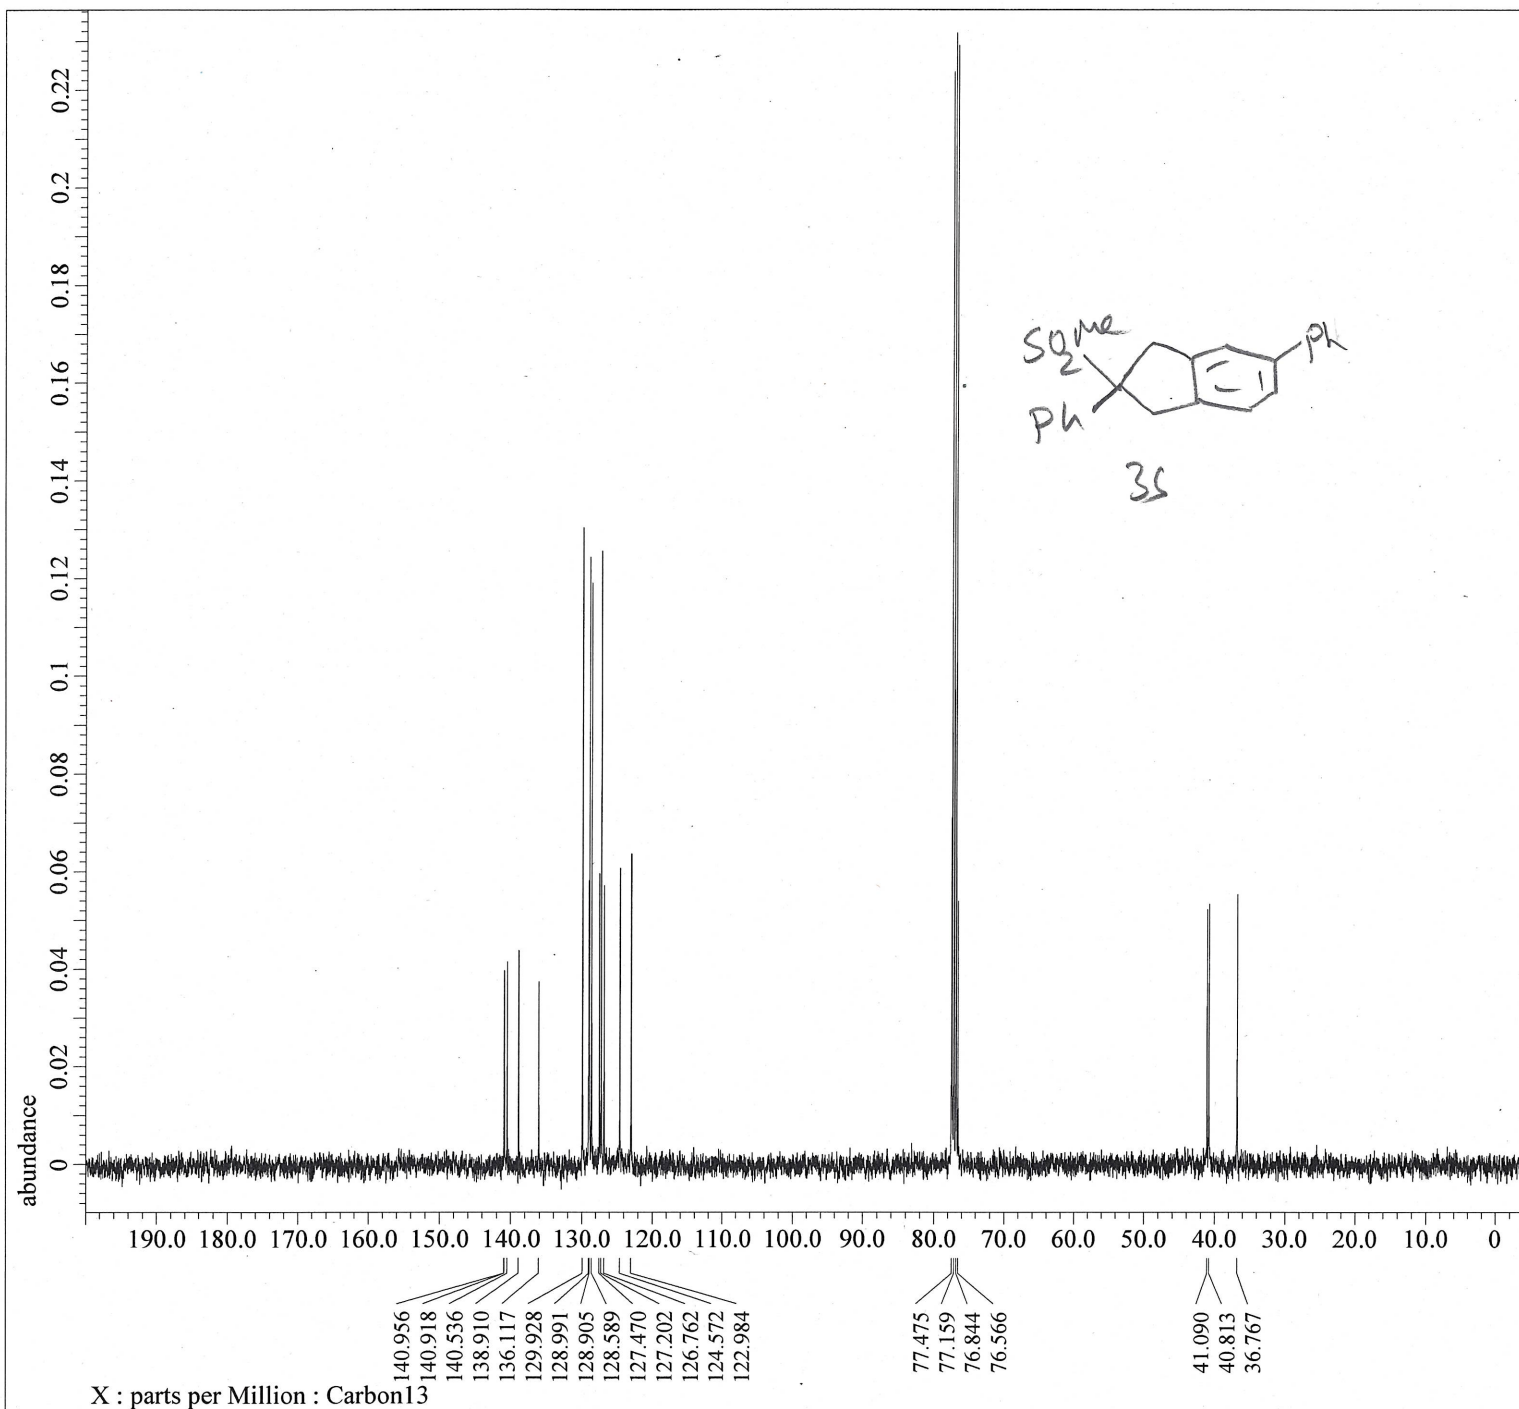

```

---- PROCESSING PARAMETERS ----
dc_balance( 0, FALSE )
sexp( 2.0[Hz], 0.0[s] )
trapezoid( 0[%], 0[%], 80[%], 100[%] )
zerofill( 1 )
fft( 1, TRUE, TRUE )
machinephase
ppm

```

Derived from: Jana260p\_Carbon-1-1.jdf

```

Filename      = Jana260p_Carbon-1-2.jdf
Author       = element
Experiment   = carbon.jxp
Sample_Id    = Jana260p
Solvent      = CHLOROFORM-D
Actual_Start_Time = 29-JUN-2024 17:14:56
Revision_Time  = 16-OCT-2024 13:28:18

Comment      = single pulse decoupled ga
Data_Format  = 1D COMPLEX
Dim_Size     = 26214
X_Domain     = Carbon
Dim_Title    = Carbon13
Dim_Units    = [ppm]
Dimensions   = X
Spectrometer = DELTA2_NMR

Field_Strength = 9.4073814[T] (400[MHz])
X_Acq_Duration = 1.03809024[s]
X_Domain       = 13C
X_Freq         = 100.71389092[MHz]
X_Offset       = 100[ppm]
X_Points       = 32768
X_Prescans     = 4
X_Resolution   = 0.96330739[Hz]
X_Sweep        = 31.56565657[kHz]
X_Sweep_Clippped = 25.25252525[kHz]
Irr_Domain     = Proton
Irr_Freq       = 400.53219825[MHz]
Irr_Offset     = 5[ppm]
Clipped        = FALSE
Scans          = 250
Total_Scans    = 250

Relaxation_Delay = 2[s]
Recvr_Gain       = 50
Temp_Get         = 20.8[dC]
X_90_Width      = 12.68[us]
X_Acq_Time       = 1.03809024[s]
X_Angle          = 30[deg]
X_Atn            = 4[dB]
X_Pulse          = 4.22666667[us]
Irr_Atn_Dec      = 26.45[dB]
Irr_Atn_No     = 26.45[dB]
Irr_Noise       = WALTZ
Irr_Pwidth      = 0.115[ms]
Decoupling       = TRUE
Initial_Wait     = 1[s]
Noe              = TRUE
Noe_Time         = 2[s]
Repetition_Time  = 3.03809024[s]

```



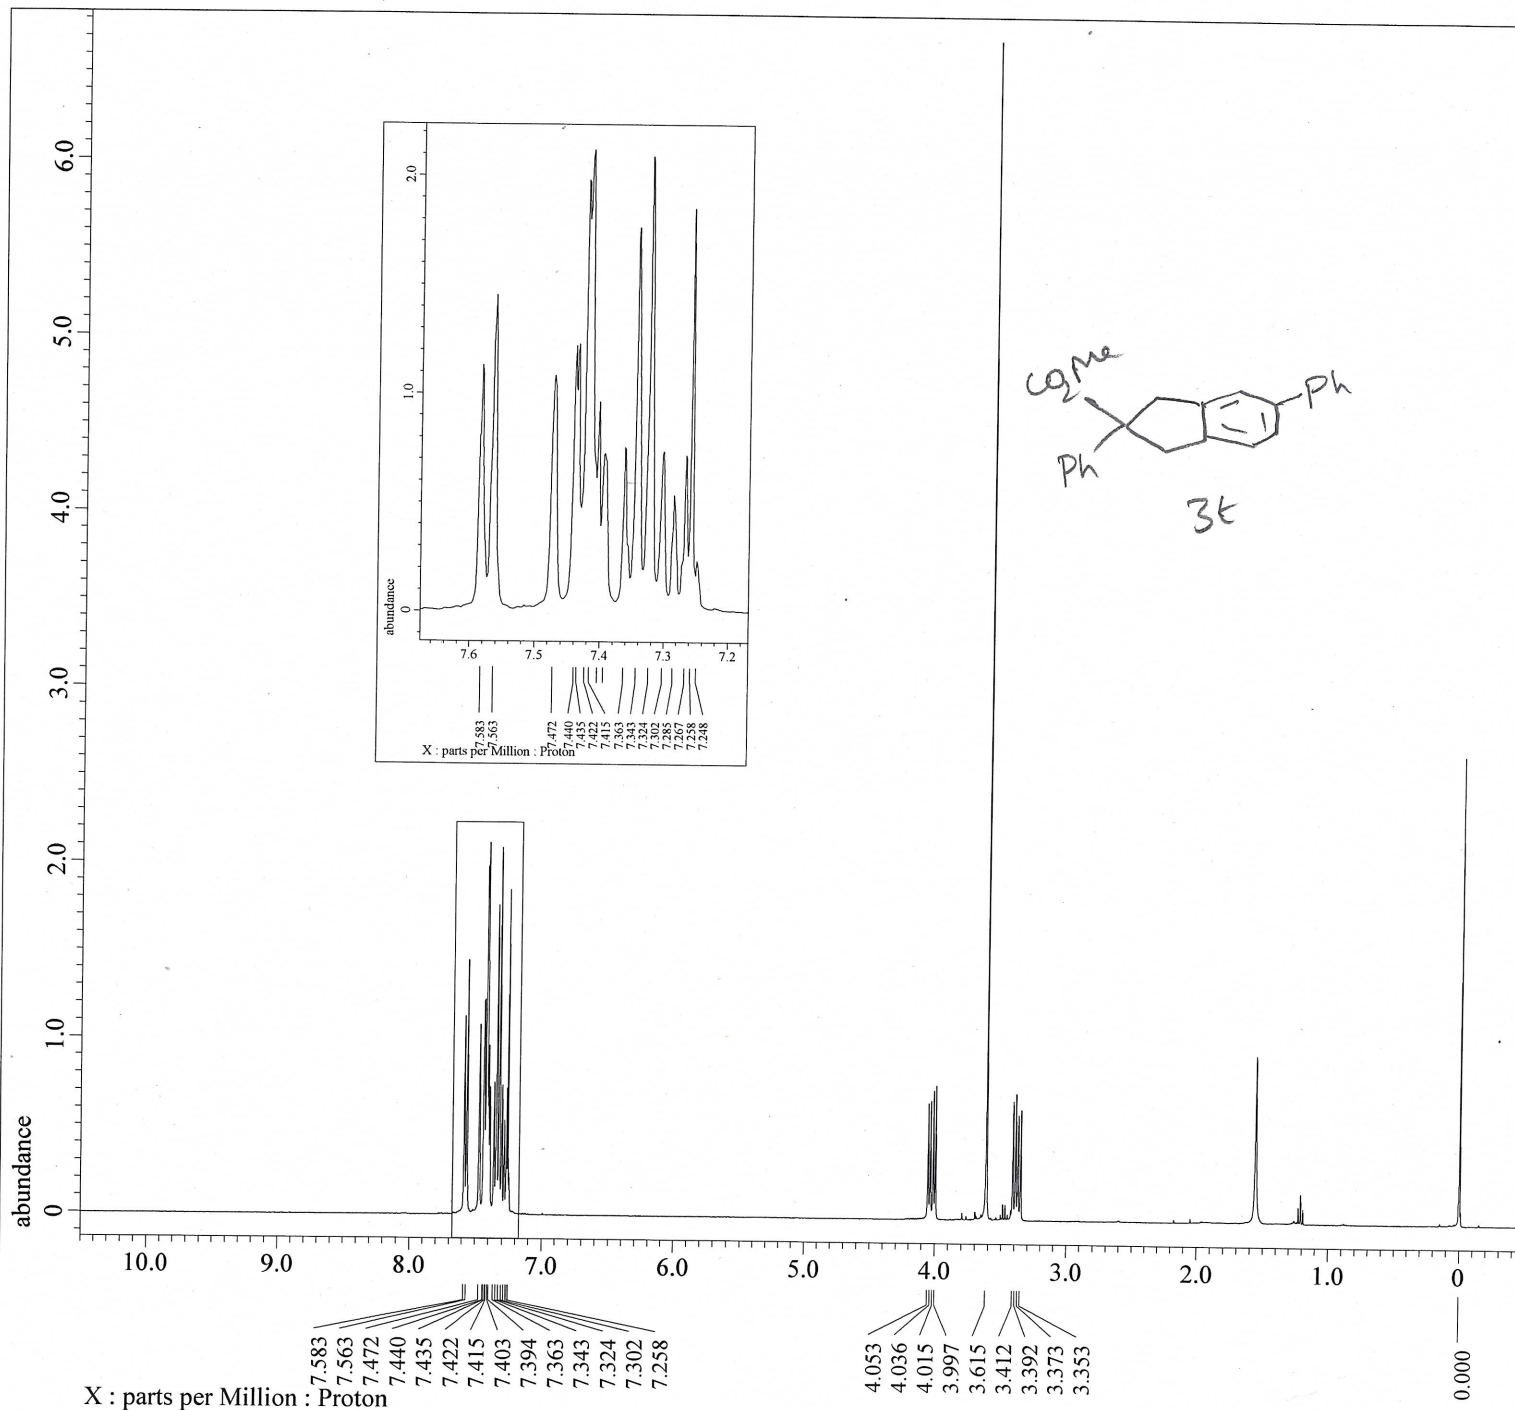

----- PROCESSING PARAMETERS -----  
 dc\_balance( 0, FALSE )  
 secp( 0.2[Hz], 0.0[s] )  
 trapezoid( 0[%], 0[%], 80[%], 100[%] )  
 zerofill( 1 )  
 fft( 1, TRUE, TRUE )  
 machinephase  
 ppm

Derived from: Jana229pp\_Proton-1-1.jdf

Filename = Jana229pp\_Proton-1-2.jdf  
 Author = element  
 Experiment = proton.jxp  
 Sample Id = Jana229pp  
 Solvent = CHLOROFORM-D  
 Actual\_Start\_Time = 15-JUN-2024 13:06:13  
 Revision\_Time = 12-FEB-2025 12:15:09

Comment = single\_pulse  
 Data Format = 1D COMPLEX  
 Dim Size = 13107  
 X Domain = Proton  
 Dim Title = Proton  
 Dim Units = [ppm]  
 Dimensions = X  
 Spectrometer = DELTA2\_NMR

Field Strength = 9.4073814[T] (400[MHz])  
 X\_Acq\_Duration = 2.18103808[s]  
 X\_Domain = 1H  
 X\_Freq = 400.53219825[MHz]  
 X\_Offset = 5[ppm]  
 X\_Points = 16384  
 X\_Prescans = 1  
 X\_Resolution = 0.45849727[Hz]  
 X\_Sweep = 7.51201923[kHz]  
 X\_Sweep\_Clippped = 6.00961538[kHz]  
 Irr\_Domain = Proton  
 Irr\_Freq = 400.53219825[MHz]  
 Irr\_Offset = 5[ppm]  
 Tri\_Domain = Proton  
 Tri\_Freq = 400.53219825[MHz]  
 Tri\_Offset = 5[ppm]  
 Clipped = FALSE  
 Scans = 8  
 Total\_Scans = 8

Relaxation\_Delay = 5[s]  
 Recvr\_Gain = 42  
 Temp\_Get = 18.4[dC]  
 X\_90\_Width = 6.7[us]  
 X\_Acq\_Time = 2.18103808[s]  
 X\_Angle = 45[deg]  
 X\_Atn = 0.8[dB]  
 X\_Pulse = 3.35[us]  
 Irr\_Mode = Off  
 Tri\_Mode = Off  
 Dante\_Presat = FALSE  
 Initial\_Wait = 1[s]  
 Repetition\_Time = 7.18103808[s]

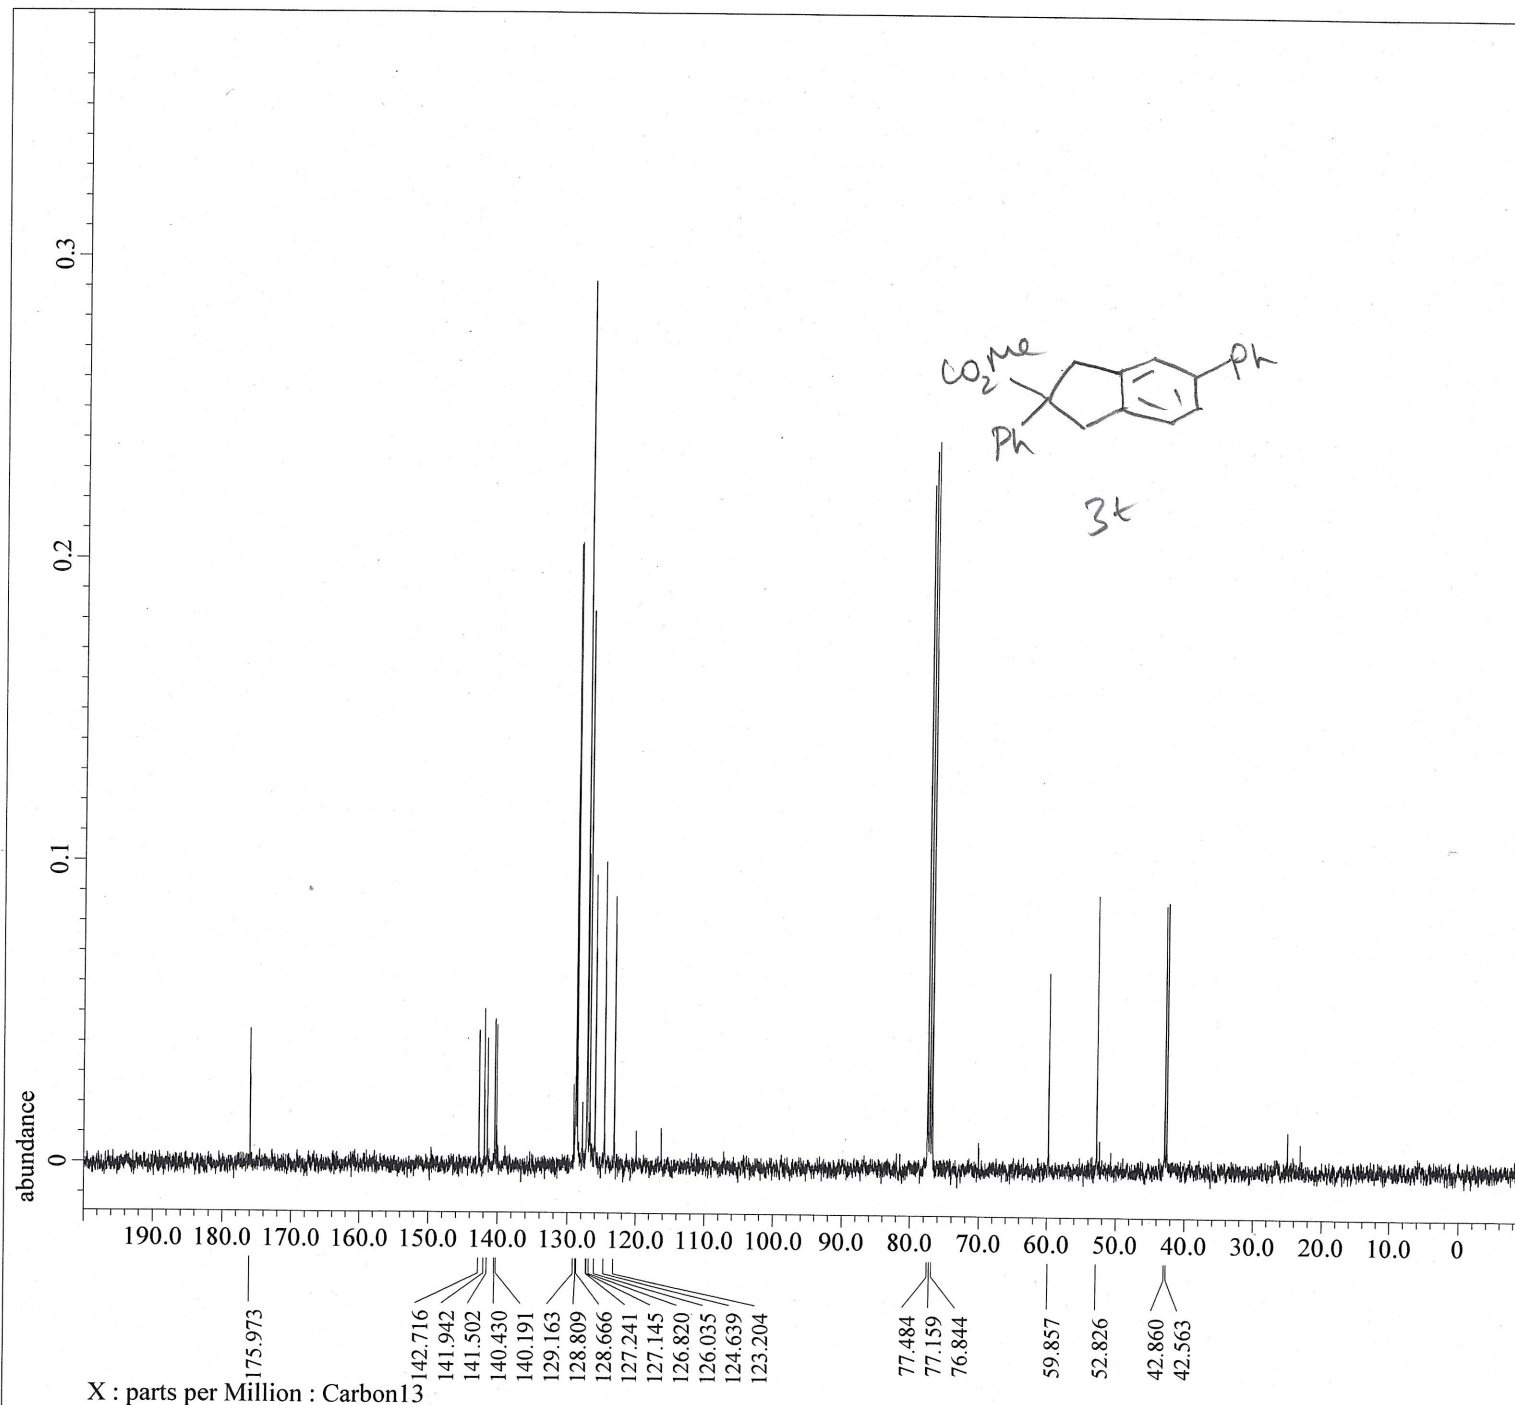

----- PROCESSING PARAMETERS -----  
 dc\_balance( 0, FALSE )  
 secp( 2.0[Hz], 0.0[s] )  
 trapezoid( 0[%], 0[%], 80[%], 100[%] )  
 zerofill( 1 )  
 fft( 1, TRUE, TRUE )  
 machinephase  
 ppm

Derived from: Jana229r\_Carbon-1-1.jdf

Filename = Jana229r\_Carbon-1-2.jdf  
 Author = element  
 Experiment = carbon.jxp  
 Sample\_Id = Jana229r  
 Solvent = CHLOROFORM-D  
 Actual\_Start\_Time = 14-JUN-2024 19:39:24  
 Revision\_Time = 15-JUN-2024 13:18:52

Comment = single pulse decoupled ga  
 Data\_Format = 1D COMPLEX  
 Dim\_Size = 26214  
 X\_Domain = Carbon  
 Dim\_Title = Carbon13  
 Dim\_Units = [ppm]  
 Dimensions = X  
 Spectrometer = DELTA2\_NMR

Field\_Strength = 9.4073814[T] (400[MHz])  
 X\_Acq\_Duration = 1.03809024[s]  
 X\_Domain = 13C  
 X\_Freq = 100.71389092[MHz]  
 X\_Offset = 100[ppm]  
 X\_Points = 32768  
 X\_Prescans = 4  
 X\_Resolution = 0.96330739[Hz]  
 X\_Sweep = 31.56565657[kHz]  
 X\_Sweep\_Clipped = 25.25252525[kHz]  
 Irr\_Domain = Proton  
 Irr\_Freq = 400.53219825[MHz]  
 Irr\_Offset = 5[ppm]  
 Clipped = FALSE  
 Scans = 200  
 Total\_Scans = 200

Relaxation\_Delay = 2[s]  
 Recvr\_Gain = 50  
 Temp\_Get = 19.7[dC]  
 X\_90\_Width = 12.68[us]  
 X\_Acq\_Time = 1.03809024[s]  
 X\_Angle = 30[deg]  
 X\_Atn = 4[dB]  
 X\_Pulse = 4.22666667[us]  
 Irr\_Atn\_Dec = 26.45[dB]  
 Irr\_Atn\_Noe = 26.45[dB]  
 Irr\_Noise = WALTZ  
 Irr\_Pwidth = 0.115[ms]  
 Decoupling = TRUE  
 Initial\_Wait = 1[s]  
 Noe = TRUE  
 Noe\_Time = 2[s]  
 Repetition\_Time = 3.03809024[s]

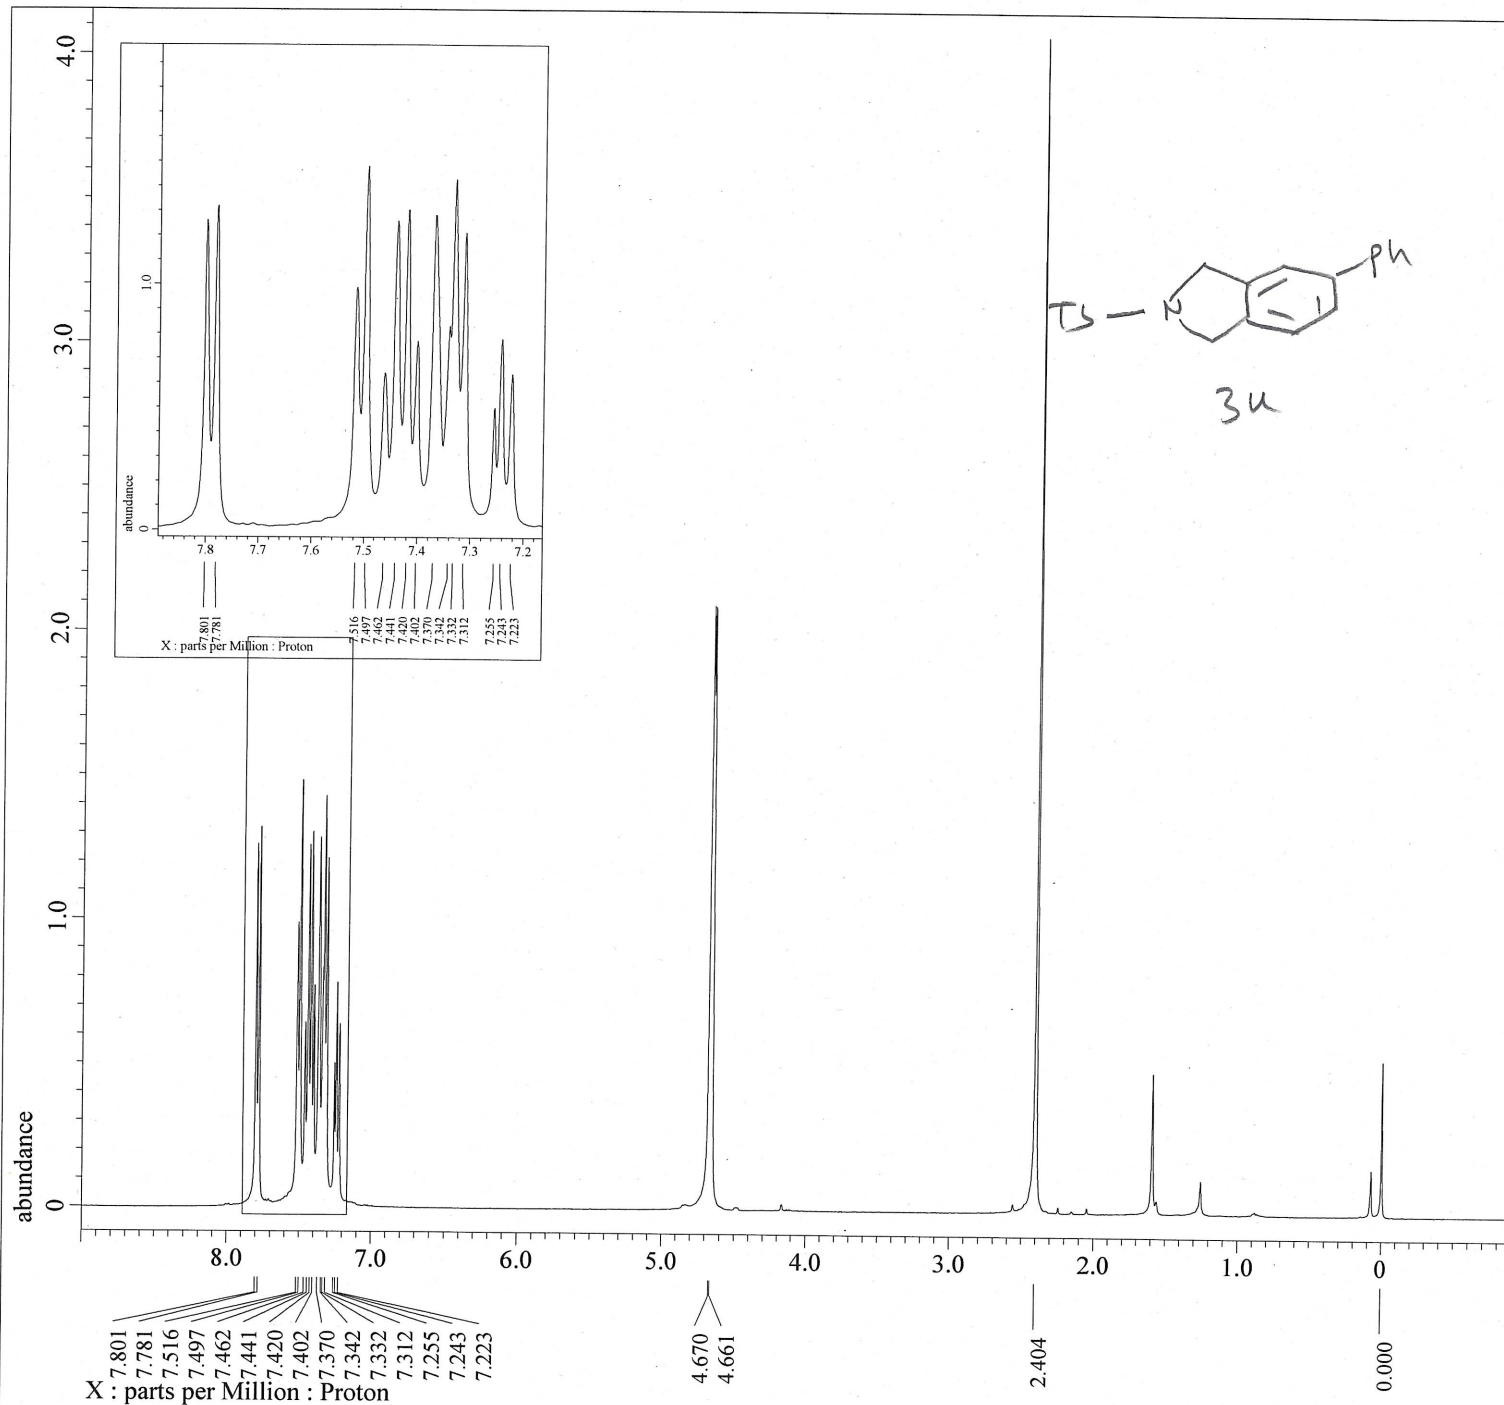

----- PROCESSING PARAMETERS -----  
 dc\_balance( 0, FALSE )  
 sexp( 0.2[Hz], 0.0[s] )  
 trapezoid( 0[%], 0[%], 80[%], 100[%] )  
 zerofill( 1 )  
 fft( 1, TRUE, TRUE )  
 machinephase  
 ppm

Derived from: Jana217p\_Proton-1-1.jdf

Filename = Jana217p\_Proton-1-2.jdf  
 Author = element  
 Experiment = proton.jxp  
 Sample\_Id = Jana217p  
 Solvent = CHLOROFORM-D  
 Actual\_Start\_Time = 31-MAY-2024 14:21:57  
 Revision\_Time = 15-JUN-2024 15:33:54

Comment = single pulse  
 Data Format = 1D COMPLEX  
 Dim\_Size = 13107  
 X\_Domain = Proton  
 Dim\_Title = Proton  
 Dim\_Units = [ppm]  
 Dimensions = X  
 Spectrometer = DELTA2\_NMR

Field\_Strength = 9.4073814[T] (400[MHz])  
 X\_Acq\_Duration = 2.18103808[s]  
 X\_Domain = 1H  
 X\_Freq = 400.53219825[MHz]  
 X\_Offset = 5[ppm]  
 X\_Points = 16384  
 X\_Prescans = 1  
 X\_Resolution = 0.45849727[Hz]  
 X\_Sweep = 7.51201923[kHz]  
 X\_Sweep\_Clipped = 6.00961538[kHz]  
 Irr\_Domain = Proton  
 Irr\_Freq = 400.53219825[MHz]  
 Irr\_Offset = 5[ppm]  
 Tri\_Domain = Proton  
 Tri\_Freq = 400.53219825[MHz]  
 Tri\_Offset = 5[ppm]  
 Clipped = FALSE  
 Scans = 8  
 Total\_Scans = 8

Relaxation\_Delay = 5[s]  
 Recvr\_Gain = 36  
 Temp\_Get = 19.6[dC]  
 X\_90\_Width = 6.7[us]  
 X\_Acq\_Time = 2.18103808[s]  
 X\_Angle = 45[deg]  
 X\_Atn = 0.8[dB]  
 X\_Pulse = 3.35[us]  
 Irr\_Mode = Off  
 Tri\_Mode = Off  
 Dante\_Presat = FALSE  
 Initial\_Wait = 1[s]  
 Repetition\_Time = 7.18103808[s]



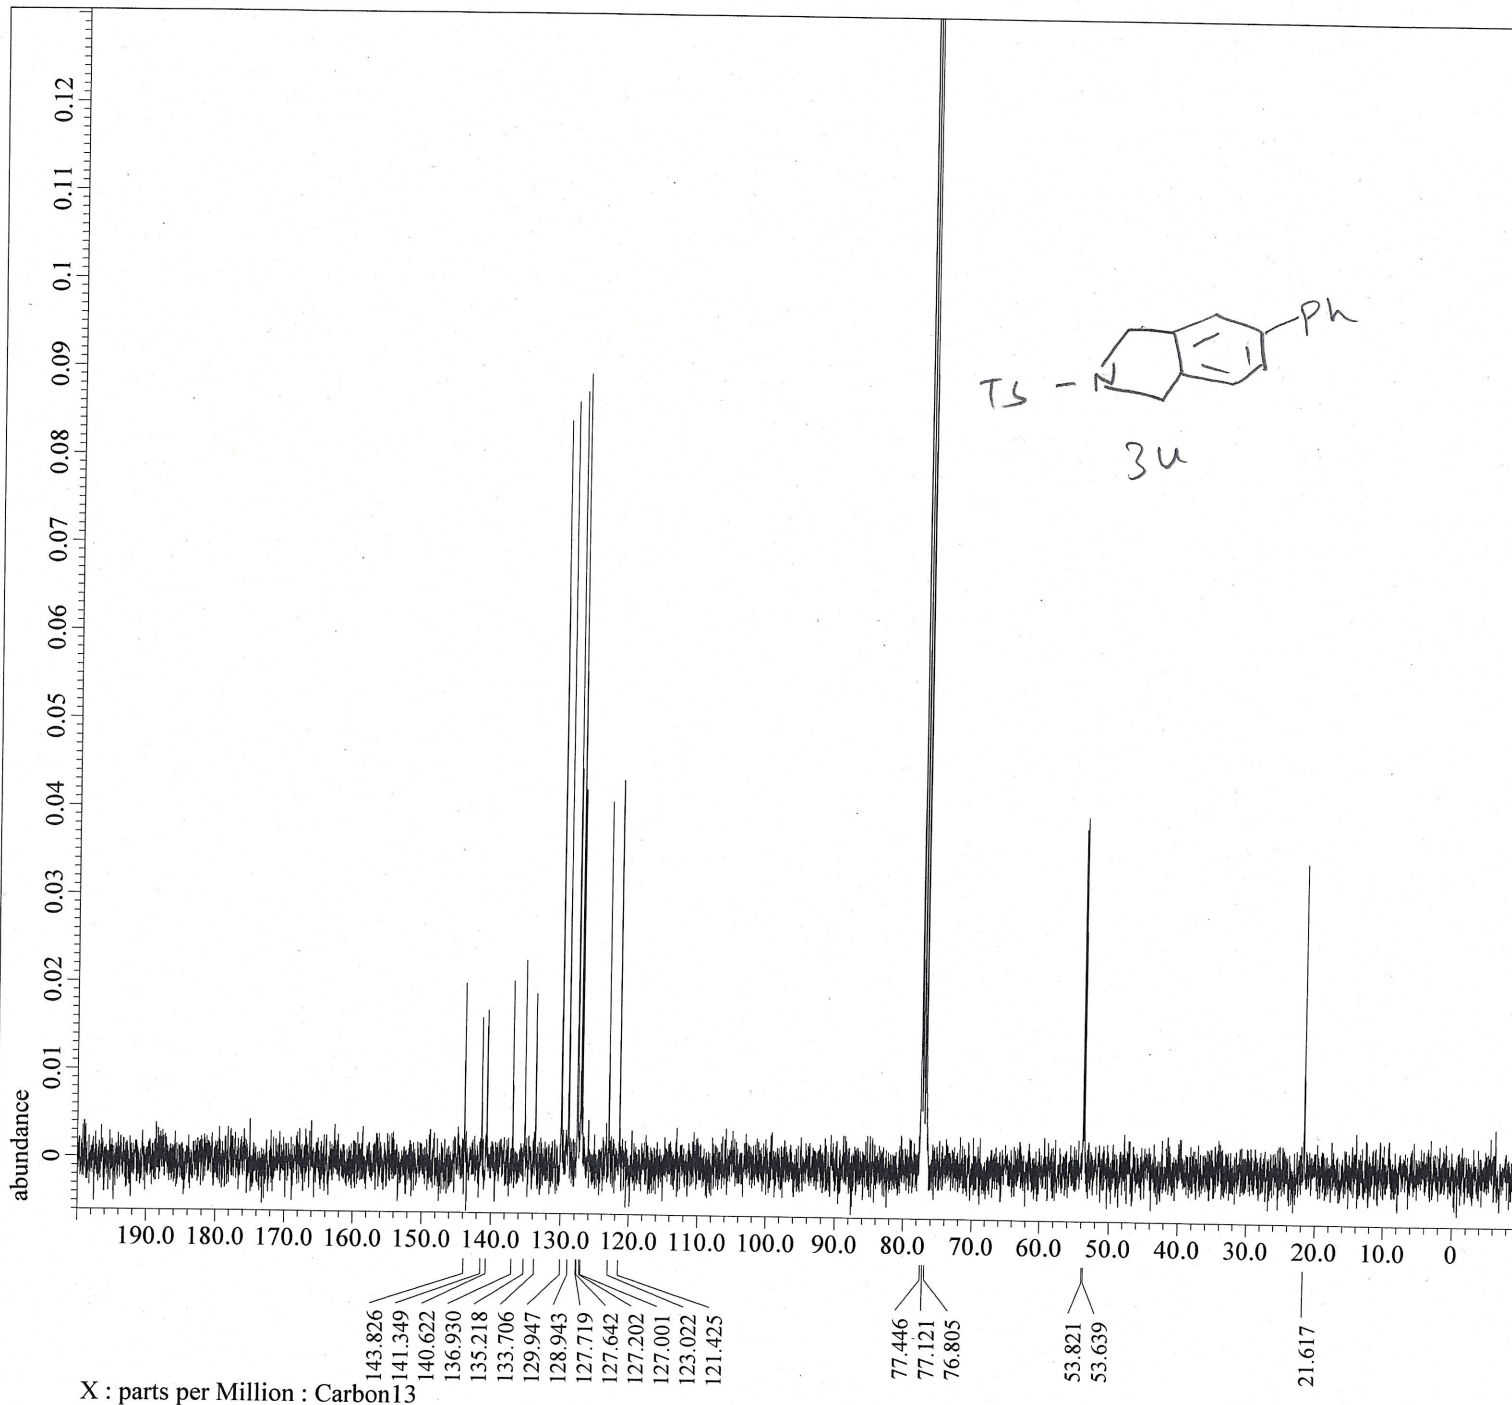

```

---- PROCESSING PARAMETERS ----
dc balance( 0, FALSE )
sexf( 2.0[Hz], 0.0[s] )
trapezoid( 0[%], 0[%], 80[%], 100[%] )
zerofill( 1 )
fft( 1, TRUE, TRUE )
machinephase
ppm

```

Derived from: Jana217\_Carbon-1-1.jdf

```

Filename      = Jana217_Carbon-1-2.jdf
Author        = element
Experiment     = carbon.jxp
Sample_Id     = Jana217p
Solvent       = CHLOROFORM-D
Actual_Start_Time = 31-MAY-2024 14:23:17
Revision_Time  = 15-JUN-2024 15:40:42

```

```

Comment       = single pulse decoupled ga
Data Format    = 1D COMPLEX
Dim_Size      = 26214
X_Domain      = Carbon
Dim_Title     = Carbon13
Dim_Units     = [ppm]
Dimensions    = X
Spectrometer  = DELTA2_NMR

```

```

Field Strength = 9.4073814[T] (400[MHz])
X_Acq_Duration = 1.03809024[s]
X_Domain       = 13C
X_Freq         = 100.71389092[MHz]
X_Offset       = 100[ppm]
X_Points       = 32768
X_Prescans     = 4
X_Resolution   = 0.96330739[Hz]
X_Sweep        = 31.56565657[kHz]
X_Sweep_Clipped = 25.25252525[kHz]
Irr_Domain     = Proton
Irr_Freq       = 400.53219825[MHz]
Irr_Offset     = 5[ppm]
Clipped        = FALSE
Scans          = 200
Total_Scans    = 200

```

```

Relaxation_Delay = 2[s]
Recvr_Gain       = 50
Temp_Get         = 20[dC]
X_90_Width       = 12.68[us]
X_Acq_Time       = 1.03809024[s]
X_Angle          = 30[deg]
X_Atn            = 4[dB]
X_Pulse          = 4.22666667[us]
Irr_Atn_Dec      = 26.45[dB]
Irr_Atn_Noise    = 26.45[dB]
Irr_Noise        = WALTZ
Irr_Pwidth       = 0.115[ms]
Decoupling       = TRUE
Initial_Wait     = 1[s]
Noe              = TRUE
Noe_Time         = 2[s]
Repetition_Time  = 3.03809024[s]

```

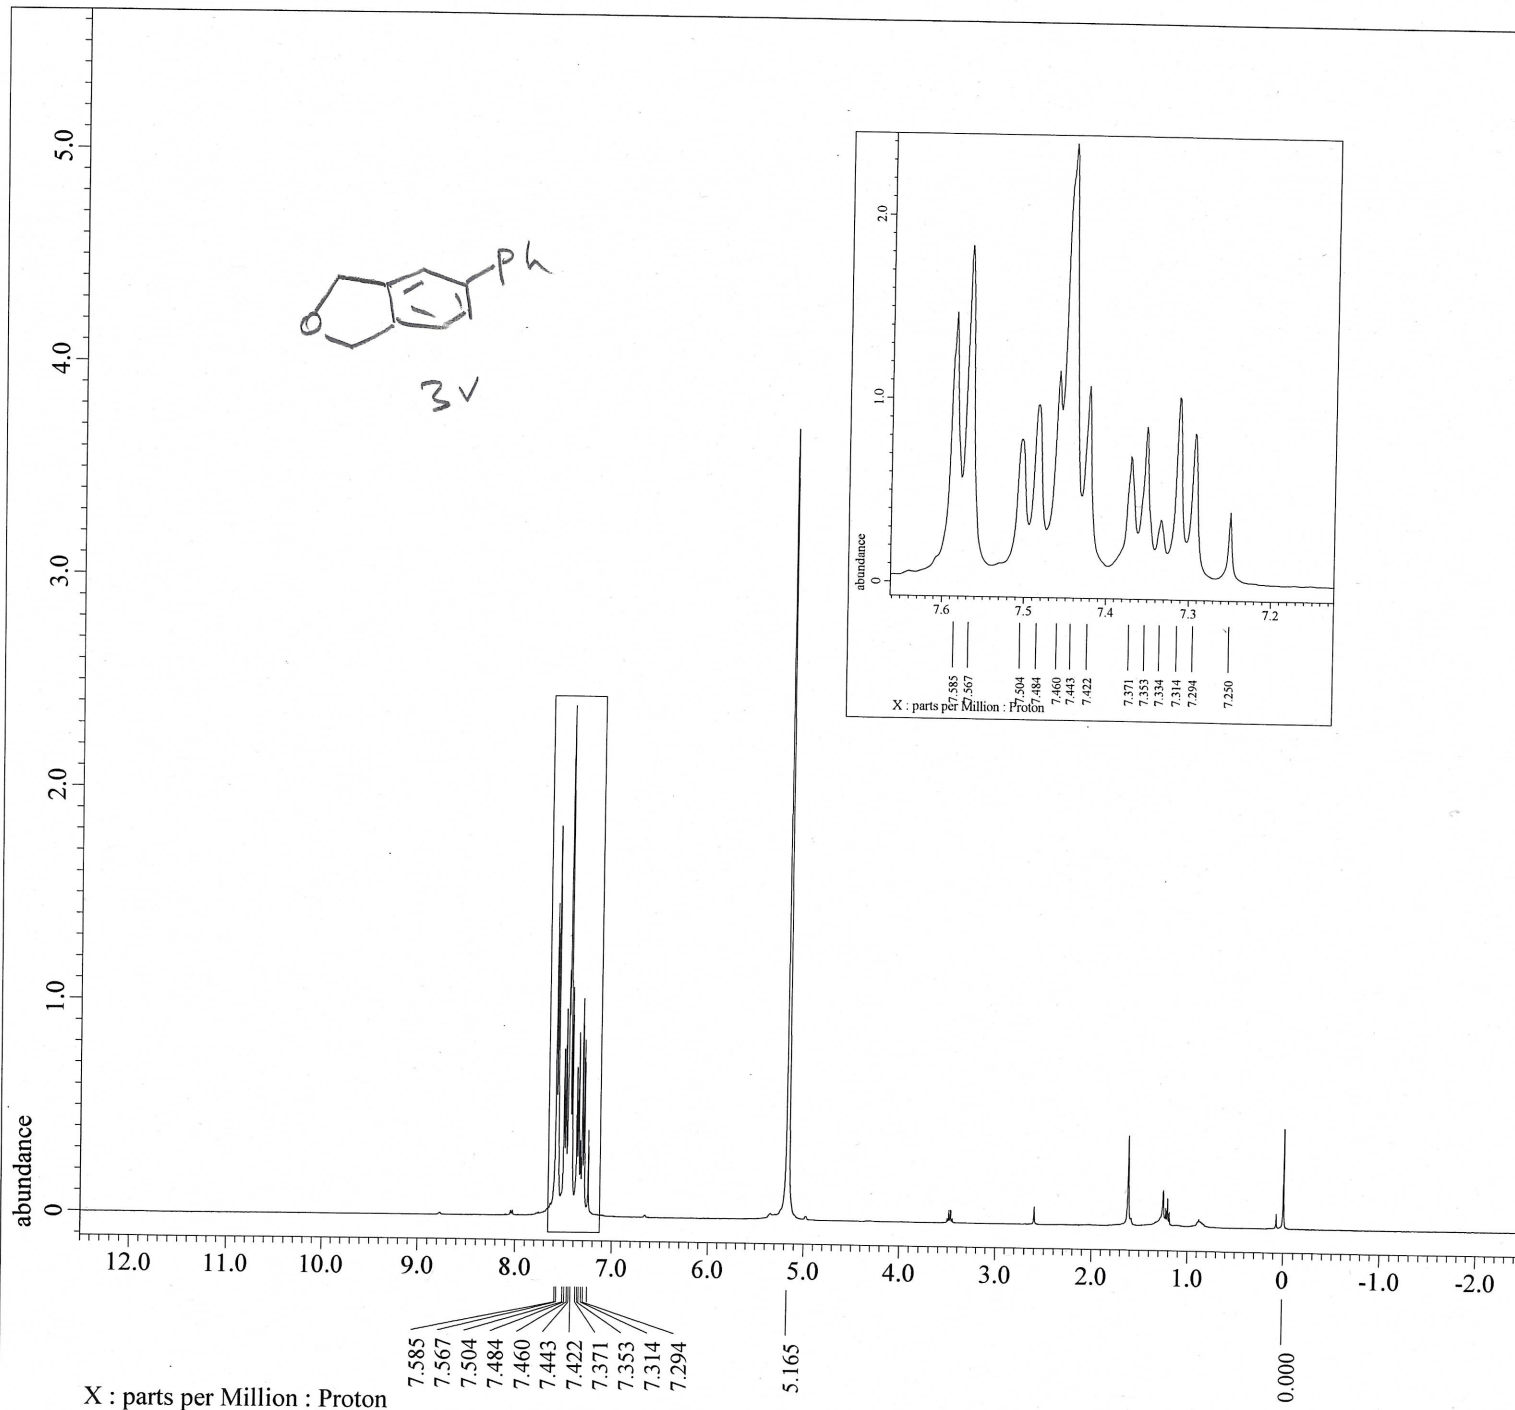

----- PROCESSING PARAMETERS -----  
 dc\_balance( 0, FALSE )  
 secp( 0.2[Hz], 0.0[s] )  
 trapezoid( 0[%], 0[%], 80[%], 100[%] )  
 zerofill( 1 )  
 fft( 1, TRUE, TRUE )  
 machinephase  
 ppm

Derived from: Jana258pp\_Proton-1-1.jdf

Filename = Jana258pp\_Proton-1-2.jdf  
 Author = element  
 Experiment = proton.jxp  
 Sample\_Id = Jana258pp  
 Solvent = CHLOROFORM-D  
 Actual\_Start\_Time = 3-JUL-2024 12:41:14  
 Revision\_Time = 12-FEB-2025 12:48:45

Comment = single\_pulse  
 Data\_Format = 1D COMPLEX  
 Dim\_Size = 13107  
 X\_Domain = Proton  
 Dim\_Title = Proton  
 Dim\_Units = [ppm]  
 Dimensions = X  
 Spectrometer = DELTA2\_NMR

Field\_Strength = 9.4073814[T] (400[MHz])  
 X\_Acq\_Duration = 2.18103808[s]  
 X\_Domain = 1H  
 X\_Freq = 400.53219825[MHz]  
 X\_Offset = 5[ppm]  
 X\_Points = 16384  
 X\_Prescans = 1  
 X\_Resolution = 0.45849727[Hz]  
 X\_Sweep = 7.51201923[kHz]  
 X\_Sweep\_Clipped = 6.00961538[kHz]  
 Irr\_Domain = Proton  
 Irr\_Freq = 400.53219825[MHz]  
 Irr\_Offset = 5[ppm]  
 Tri\_Domain = Proton  
 Tri\_Freq = 400.53219825[MHz]  
 Tri\_Offset = 5[ppm]  
 Clipped = FALSE  
 Scans = 8  
 Total\_Scans = 8

Relaxation\_Delay = 5[s]  
 Recvr\_Gain = 36  
 Temp\_Get = 18.7[dC]  
 X\_90\_Width = 6.7[us]  
 X\_Acq\_Time = 2.18103808[s]  
 X\_Angle = 45[deg]  
 X\_Atn = 0.8[dB]  
 X\_Pulse = 3.35[us]  
 Irr\_Mode = Off  
 Tri\_Mode = Off  
 Dante\_Presat = FALSE  
 Initial\_Wait = 1[s]  
 Repetition\_Time = 7.18103808[s]



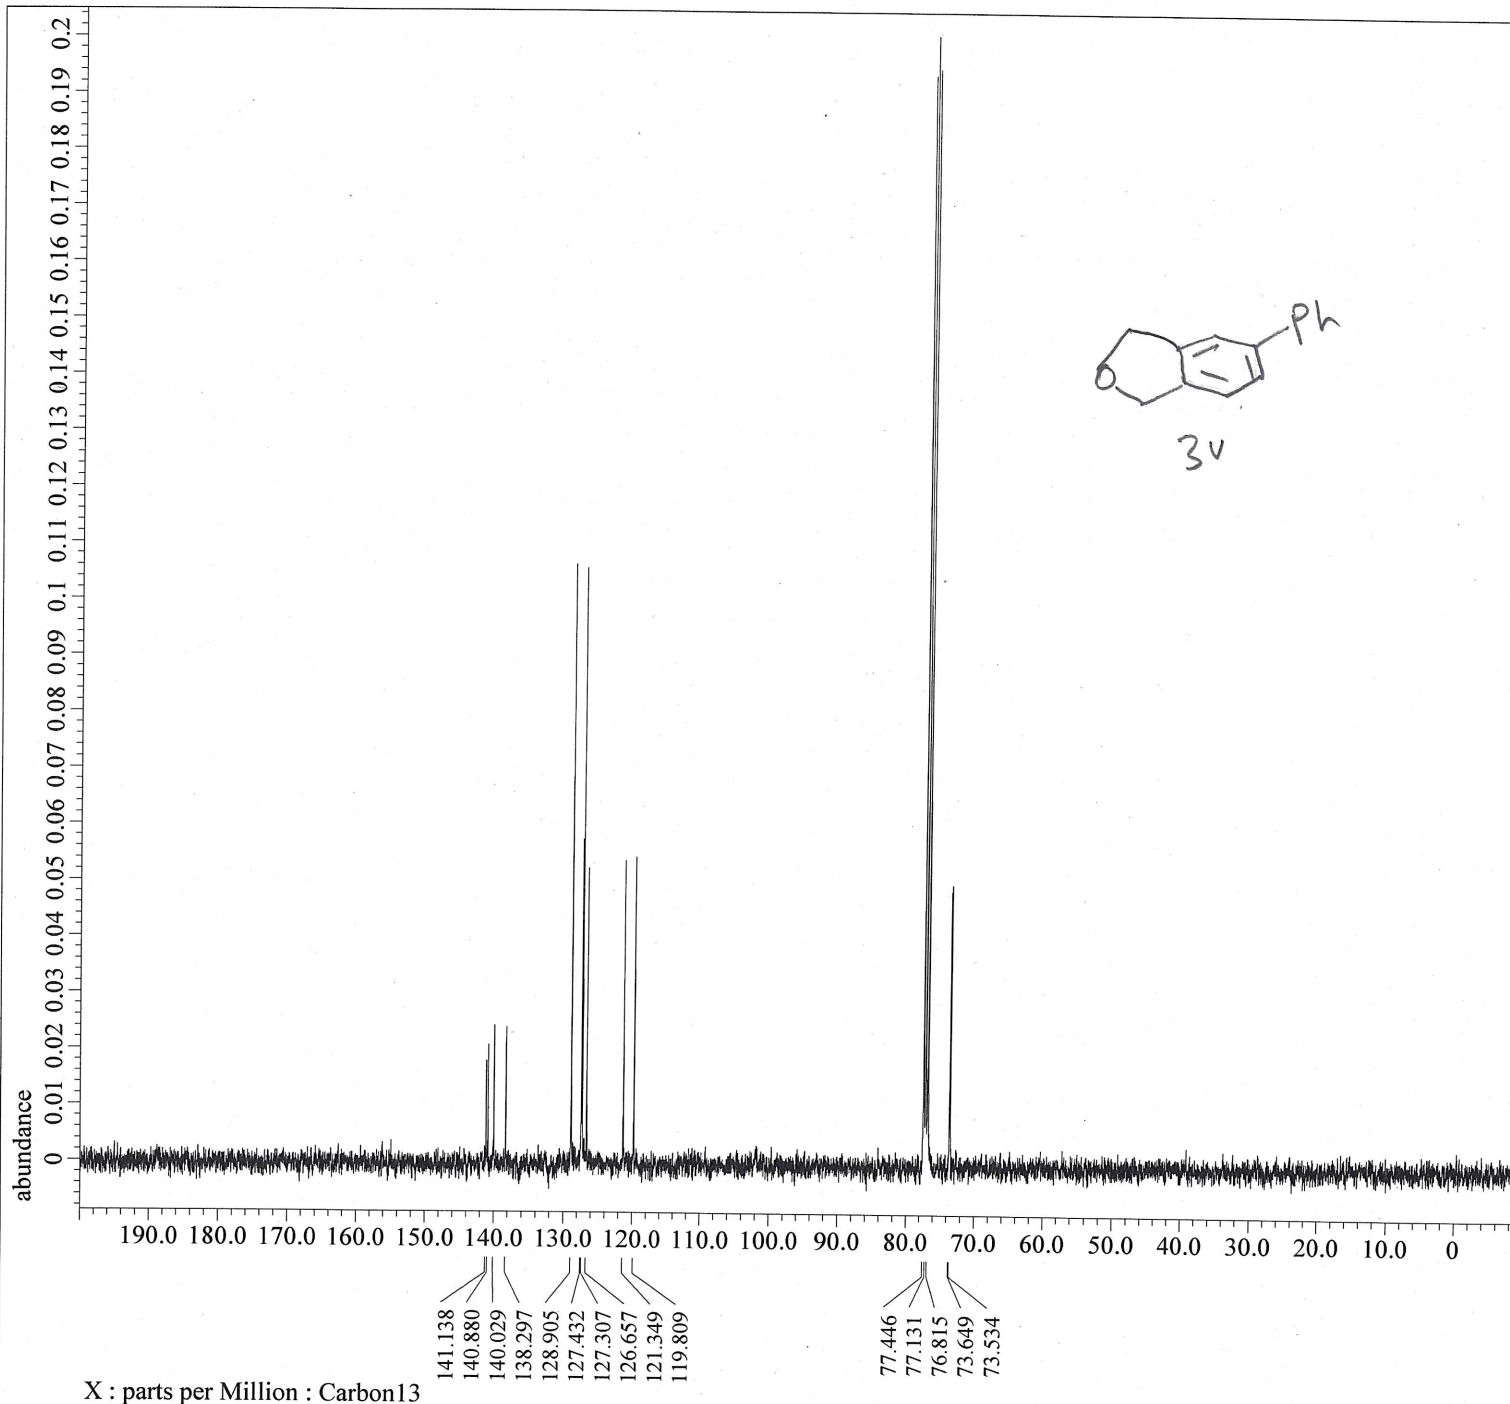

----- PROCESSING PARAMETERS -----  
 dc\_balance( 0, FALSE )  
 sexp( 2.0[Hz], 0.0[s] )  
 trapezoid( 0[%], 0[%], 80[%], 100[%] )  
 zerofill( 1 )  
 fft( 1, TRUE, TRUE )  
 machinephase  
 ppm

Derived from: Jana258pp\_Carbon-1-1.jdf

Filename = Jana258pp\_Carbon-1-2.jdf  
 Author = element  
 Experiment = carbon.jxp  
 Sample\_Id = Jana258pp  
 Solvent = CHLOROFORM-D  
 Actual\_Start\_Time = 3-JUL-2024 12:42:33  
 Revision\_Time = 19-OCT-2024 17:11:35

Comment = single pulse decoupled ga  
 Data Format = 1D COMPLEX  
 Dim\_Size = 26214  
 X\_Domain = Carbon  
 Dim\_Title = Carbon13  
 Dim\_Units = [ppm]  
 Dimensions = X  
 Spectrometer = DELTA2\_NMR

Field\_Strength = 9.4073814[T] (400[MHz])  
 X\_Acq\_Duration = 1.03809024[s]  
 X\_Domain = 13C  
 X\_Freq = 100.71389092[MHz]  
 X\_Offset = 100[ppm]  
 X\_Points = 32768  
 X\_Prescans = 4  
 X\_Resolution = 0.96330739[Hz]  
 X\_Sweep = 31.56565657[kHz]  
 X\_Sweep\_Clipped = 25.25252525[kHz]  
 Irr\_Domain = Proton  
 Irr\_Freq = 400.53219825[MHz]  
 Irr\_Offset = 5[ppm]  
 Clipped = FALSE  
 Scans = 300  
 Total\_Scans = 300

Relaxation\_Delay = 2[s]  
 Recvr\_Gain = 50  
 Temp\_Get = 19.2[dC]  
 X\_90\_Width = 12.68[us]  
 X\_Acq\_Time = 1.03809024[s]  
 X\_Angle = 30[deg]  
 X\_Atn = 4[dB]  
 X\_Pulse = 4.22666667[us]  
 Irr\_Atn\_Dec = 26.45[dB]  
 Irr\_Atn\_No = 26.45[dB]  
 Irr\_Noise = WALTZ  
 Irr\_Pwidth = 0.115[ms]  
 Decoupling = TRUE  
 Initial\_Wait = 1[s]  
 Noe = TRUE  
 Noe\_Time = 2[s]  
 Repetition\_Time = 3.03809024[s]

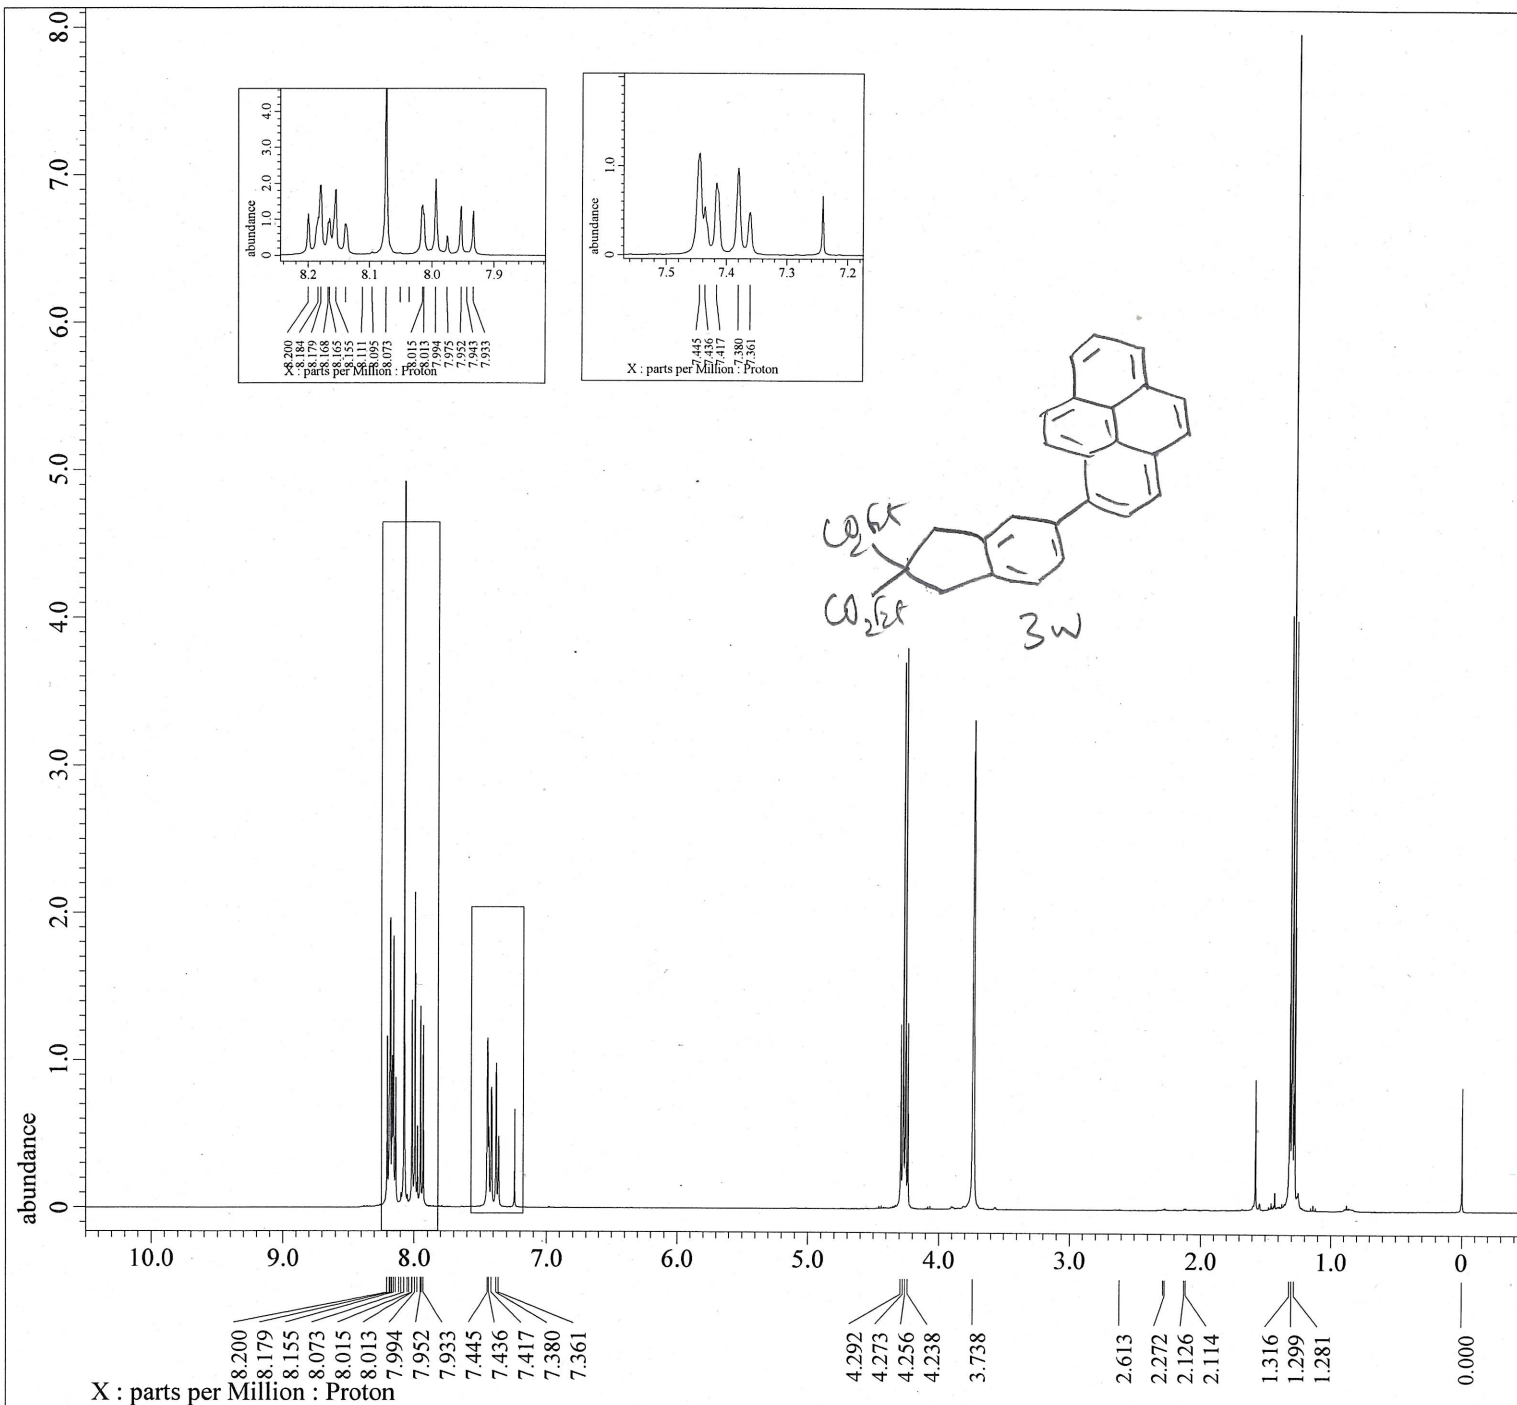

```

---- PROCESSING PARAMETERS ----
dc_balance( 0, FALSE )
sexf( 0.2[Hz], 0.0[s] )
trapezoid( 0[%], 0[%], 80[%], 100[%] )
zerofill( 1 )
fft( 1, TRUE, TRUE )
machinephase
ppm

```

Derived from: Jana265\_Proton-1-1.jdf

```

Filename      = Jana265_Proton-1-2.jdf
Author       = element
Experiment    = proton.jxp
Sample_Id     = Jana265
Solvent       = CHLOROFORM-D
Actual_Start_Time = 3-JUL-2024 21:17:02
Revision_Time  = 15-OCT-2024 19:54:55

```

```

Comment      = single_pulse
Data Format    = 1D COMPLEX
Dim_Size      = 13107
X_Domain      = Proton
Dim_Title     = Proton
Dim_Units     = [ppm]
Dimensions    = X
Spectrometer  = DELTA2_NMR

```

```

Field_Strength = 9.4073814[T] (400[MHz])
X_Acq_Duration = 2.18103808[s]
X_Domain       = 1H
X_Freq         = 400.53219825[MHz]
X_Offset       = 5[ppm]
X_Points       = 16384
X_Prescans     = 1
X_Resolution   = 0.45849727[Hz]
X_Sweep        = 7.51201923[kHz]
X_Sweep_Clippped = 6.00961538[kHz]
Irr_Domain     = Proton
Irr_Freq       = 400.53219825[MHz]
Irr_Offset     = 5[ppm]
Tri_Domain     = Proton
Tri_Freq       = 400.53219825[MHz]
Tri_Offset     = 5[ppm]
Clipped        = FALSE
Scans          = 8
Total_Scans    = 8

```

```

Relaxation_Delay = 5[s]
Recvr_Gain       = 34
Temp_Get         = 19.5[dC]
X_90_Width      = 6.7[us]
X_Acq_Time       = 2.18103808[s]
X_Angle          = 45[deg]
X_Atn            = 0.8[dB]
X_Pulse         = 3.35[us]
Irr_Mode         = Off
Tri_Mode         = Off
Dante_Presat     = FALSE
Initial_Wait     = 1[s]
Repetition_Time  = 7.18103808[s]

```

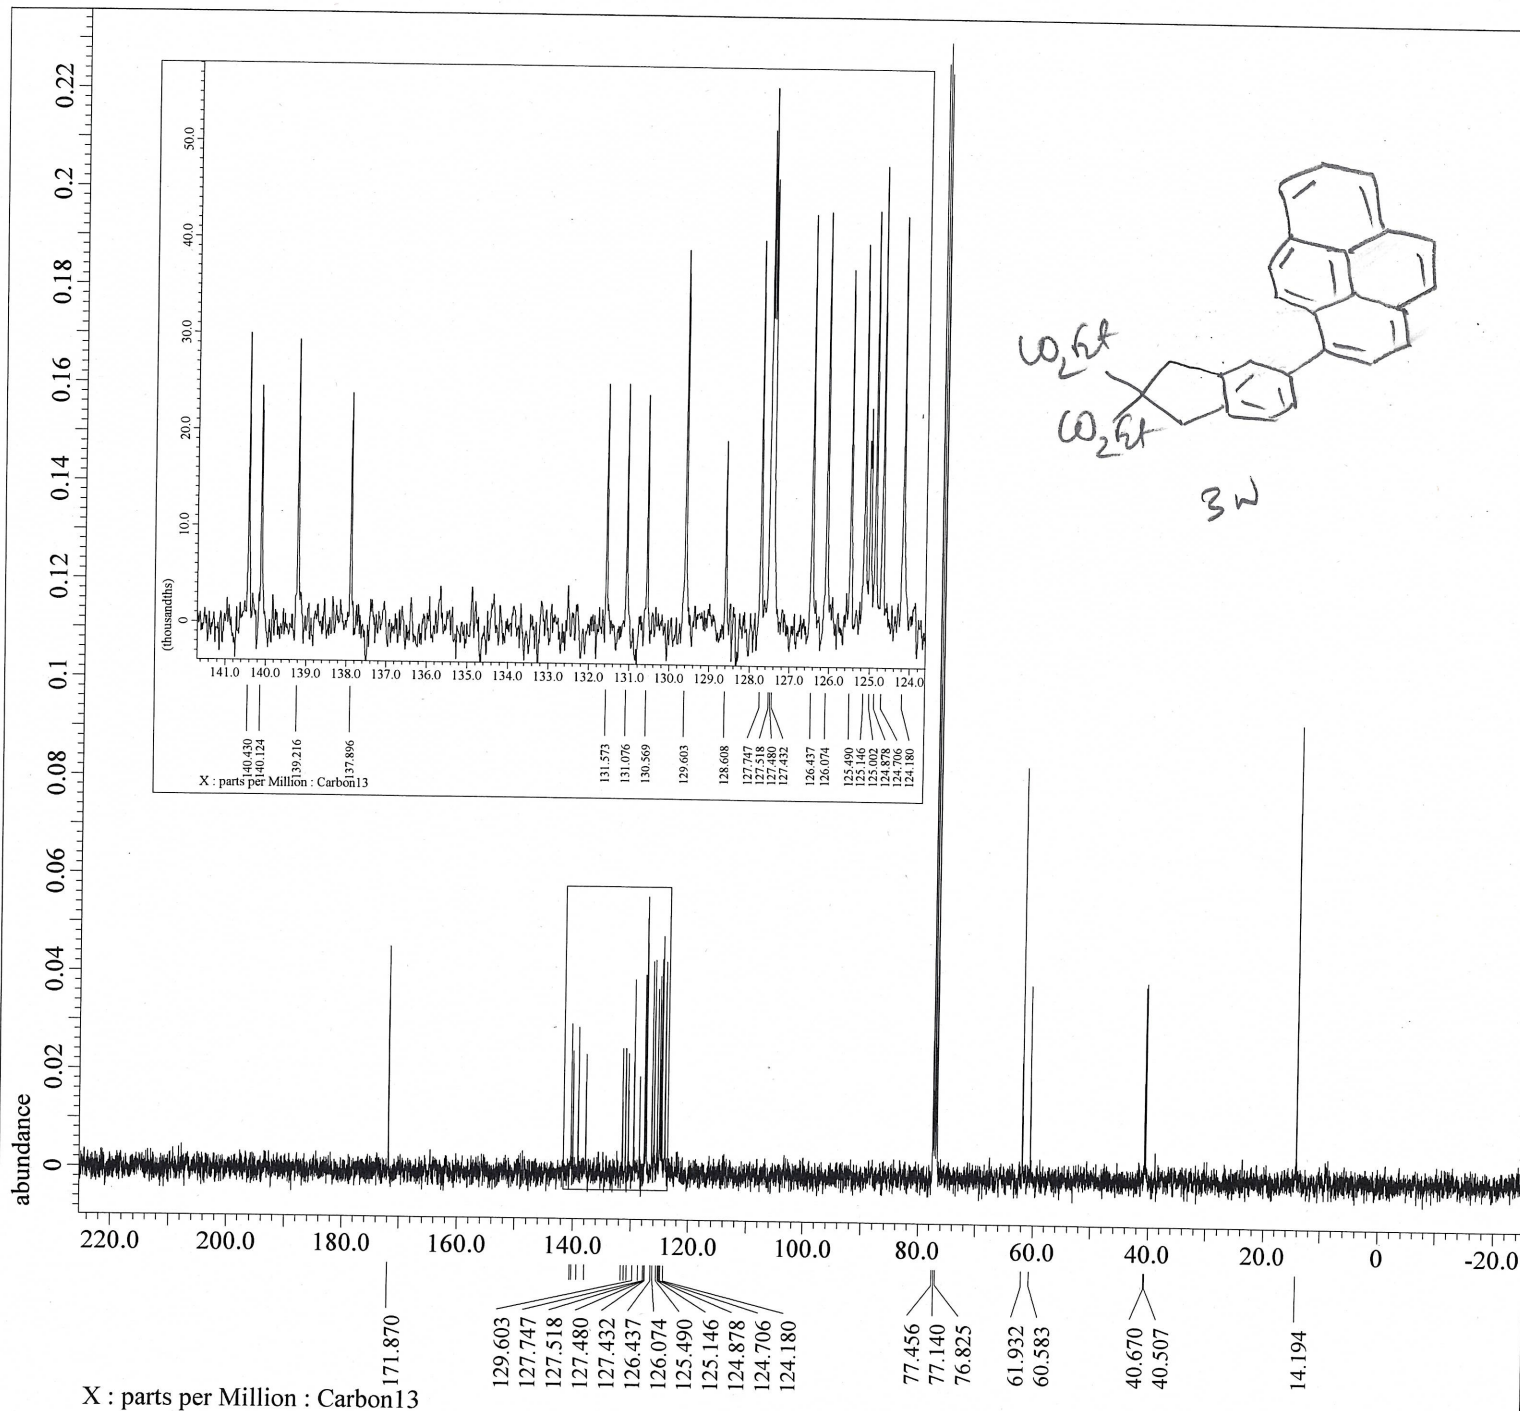

---- PROCESSING PARAMETERS ----  
 dc\_balance( 0, FALSE )  
 sexp( 2.0[Hz], 0.0[s] )  
 trapezoid( 0[%], 0[%], 80[%], 100[%] )  
 zerofill( 1 )  
 fft( 1, TRUE, TRUE )  
 machinephase  
 ppm

Derived from: Jana265\_Carbon-1-1.jdf

Filename = Jana265\_Carbon-1-2.jdf  
 Author = element  
 Experiment = carbon.jxp  
 Sample\_Id = Jana265  
 Solvent = CHLOROFORM-D  
 Actual\_Start\_Time = 3-JUL-2024 21:18:22  
 Revision\_Time = 12-FEB-2025 12:59:58  
 Comment = single pulse decoupled ga  
 Data\_Format = 1D COMPLEX  
 Dim\_Size = 26214  
 X\_Domain = Carbon  
 Dim\_Title = Carbon13  
 Dim\_Units = [ppm]  
 Dimensions = X  
 Spectrometer = DELTA2\_NMR

Field\_Strength = 9.4073814[T] (400[MHz])  
 X\_Acq\_Duration = 1.03809024[s]  
 X\_Domain = 13C  
 X\_Freq = 100.71389092[MHz]  
 X\_Offset = 100[ppm]  
 X\_Points = 32768  
 X\_Prescans = 4  
 X\_Resolution = 0.96330739[Hz]  
 X\_Sweep = 31.56565657[kHz]  
 X\_Sweep\_Clippped = 25.25252525[kHz]  
 Irr\_Domain = Proton  
 Irr\_Freq = 400.53219825[MHz]  
 Irr\_Offset = 5[ppm]  
 Clipped = FALSE  
 Scans = 200  
 Total\_Scans = 200

Relaxation\_Delay = 2[s]  
 Recvr\_Gain = 50  
 Temp\_Get = 19.3[dC]  
 X\_90\_Width = 12.68[us]  
 X\_Acq\_Time = 1.03809024[s]  
 X\_Angle = 30[deg]  
 X\_Atn = 4[dB]  
 X\_Pulse = 4.22666667[us]  
 Irr\_Atn\_Dec = 26.45[dB]  
 Irr\_Atn\_Noie = 26.45[dB]  
 Irr\_Noise = WALTZ  
 Irr\_Pwidth = 0.115[ms]  
 Decoupling = TRUE  
 Initial\_Wait = 1[s]  
 Noe = TRUE  
 Noe\_Time = 2[s]  
 Repetition\_Time = 3.03809024[s]
